# Supplementary material for: The importance of diabatic processes for the dynamics of synoptic-scale extratropical weather systems – a review
Source: Copernicus journal article supplement (doi:10.5194/wcd-5-1299-2024), 2024-10-24

Supplement of Weather Clim. Dynam., 5, 1299–1408, 2024  
<https://doi.org/10.5194/wcd-5-1299-2024-supplement>  
© Author(s) 2024. CC BY 4.0 License.

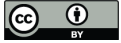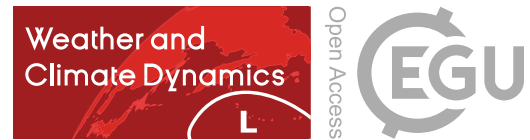

*Supplement of*

## **The importance of diabatic processes for the dynamics of synoptic-scale extratropical weather systems – a review**

**Heini Wernli and Suzanne L. Gray**

*Correspondence to:* Heini Wernli (heini.wernli@env.ethz.ch)

The copyright of individual parts of the supplement might differ from the article licence.

## Supplement

The following pages contain figures for the four “catalyst cyclones” discussed in the paper. The figures are all produced with ERA5 reanalysis data and serve to illustrate the structure and evolution of the four cyclones with synoptic and PV maps, and vertical cross sections (at selected times). The four catalyst cyclones are:

- QE II storm                                00 UTC on 09 September – 18 UTC on 12 September 1978
- President’s Day cyclone                00 UTC on 17 February – 18 UTC on 22 February 1979
- U.K. Great October storm               00 UTC on 13 October – 18 UTC on 18 October 1987
- Lothar                                         00 UTC on 23 December – 18 UTC on 28 December 1999

The following fields are shown for each cyclone on horizontal maps at six-hourly intervals during the time periods indicated above:

- left panels: PV on 315 K (colours, in pvu) and MSLP (contours, every 4 hPa)
- middle panels: PV at 850 hPa (colours, in pvu) and MSLP (contours, every 4 hPa)
- right panels: potential temperature at 850 hPa (colours, in K), hourly accumulated total precipitation (light and dark blue contours for 2 and 5 mm h<sup>-1</sup>, respectively), and MSLP (contours, every 4 hPa)

In addition, meridional (left panels, from S to N) and zonal (right panels, from W to E) vertical cross sections are shown through the centre of the cyclones at the time of minimum MSLP and at a few earlier times (as indicated specifically for each cyclone). Cross-sections show PV (colours, in PVU) and equivalent potential temperature (contours, every 3 K).

**Acknowledgements:** We are most grateful to Franziska Schnyder (ETH Zurich) for producing all figures shown in this Supplement.

## QE II storm

Horizontal maps from 00 UTC on 09 September – 18 UTC on 12 September 1978

Vertical cross sections from 18 UTC on 09 September – 18 UTC on 10 September 1978

meridional cross sections (S to N)

| date        | cyclone center | cross sections |               | minimum MSLP |
|-------------|----------------|----------------|---------------|--------------|
|             |                | from           | to            |              |
| 19780909_18 | 64°W / 39°N    | 64°W / 29°N    | 64°W / 49°N   | 998 hPa      |
| 19780910_00 | 58°W / 39.5°N  | 58°W / 29.5°N  | 58°W / 49.5°N | 986 hPa      |
| 19780910_06 | 55°W / 41.5°N  | 55°W / 31.5°N  | 55°E / 51.5°N | 970 hPa      |
| 19780910_12 | 51°W / 42.5°N  | 51°W / 32.5°N  | 51°W / 52.5°N | 958 hPa      |
| 19780910_18 | 49°W / 45.5°N  | 49°W / 35.5°N  | 49°W / 55.5°N | 958 hPa      |

zonal cross sections (W to E)

| date        | cyclone center | cross sections |               | minimum MSLP |
|-------------|----------------|----------------|---------------|--------------|
|             |                | from           | to            |              |
| 19780909_18 | 64°W / 39°N    | 84°W / 39°N    | 44°W / 39°N   | 998 hPa      |
| 19780910_00 | 58°W / 39.5°N  | 78°W / 39.5°N  | 38°W / 39.5°N | 986 hPa      |
| 19780910_06 | 55°W / 41.5°N  | 75°W / 41.5°N  | 35°W / 41.5°N | 970 hPa      |
| 19780910_12 | 51°W / 42.5°N  | 71°W / 42.5°N  | 31°W / 42.5°N | 958 hPa      |
| 19780910_18 | 49°W / 45.5°N  | 69°W / 45.5°N  | 29°W / 45.5°N | 958 hPa      |

00 UTC on 09 September 1978

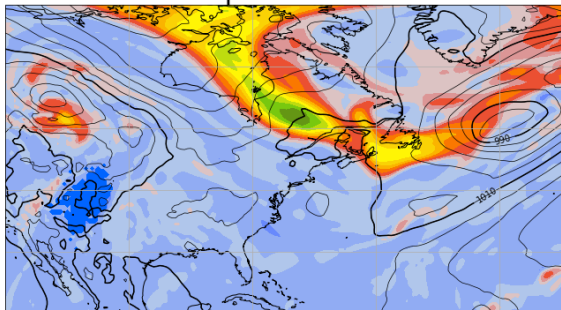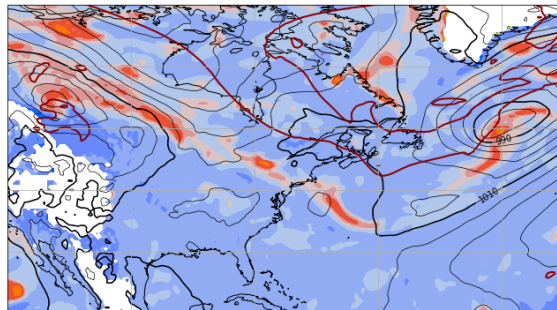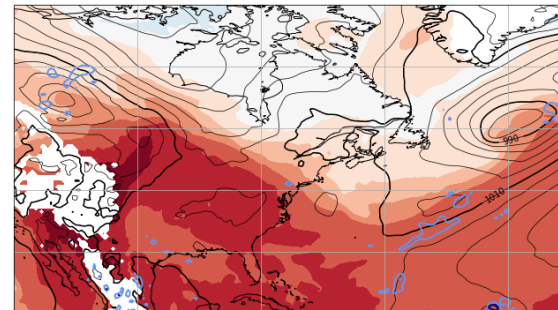

06 UTC on 09 September 1978

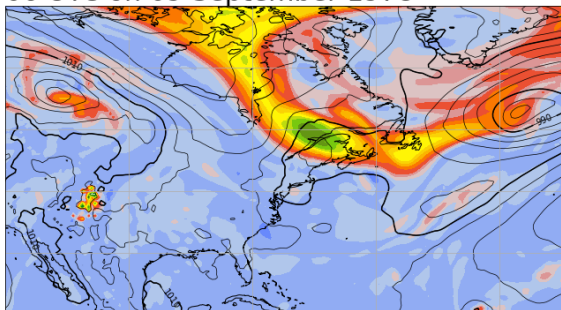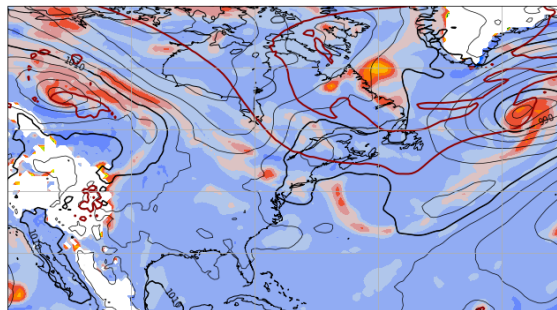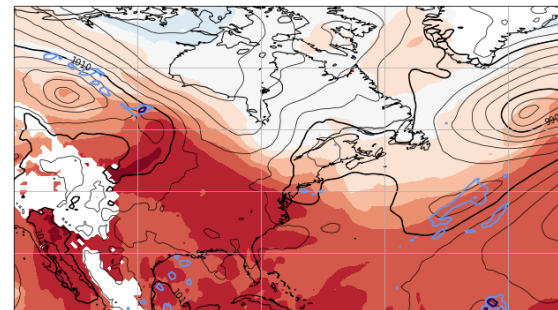

12 UTC on 09 September 1978

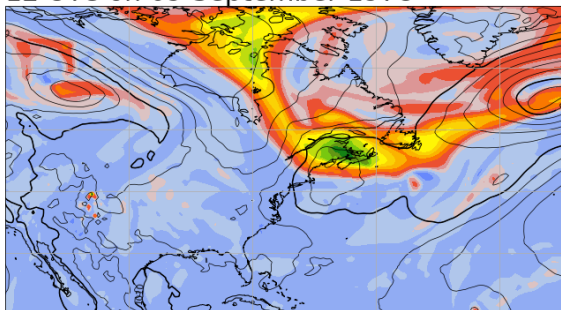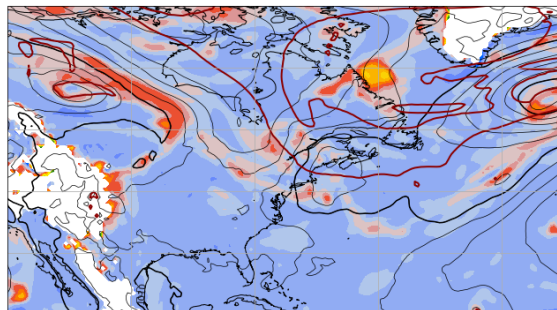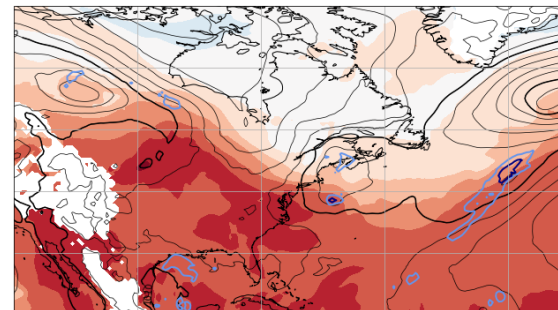

18 UTC on 09 September 1978

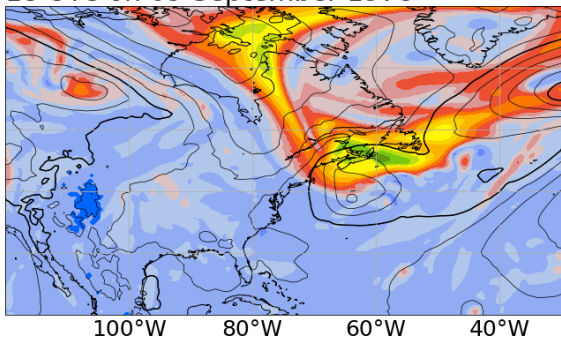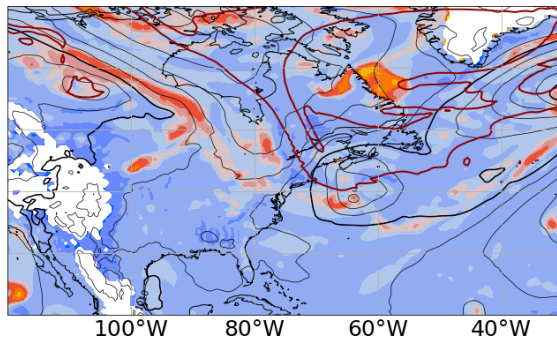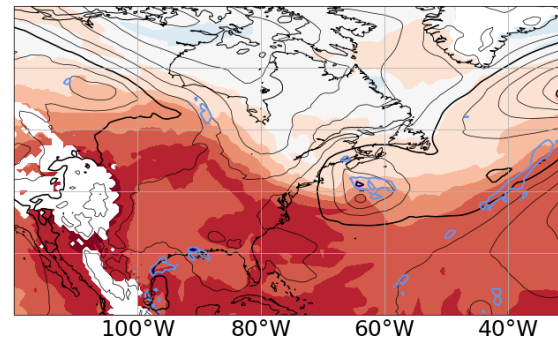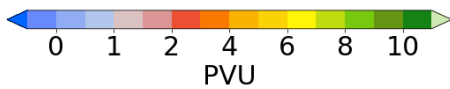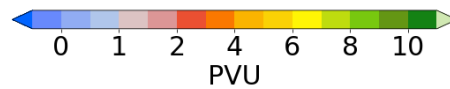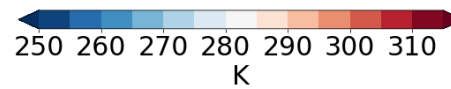

00 UTC on 10 September 1978

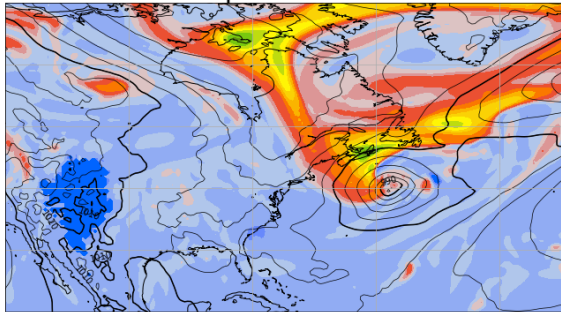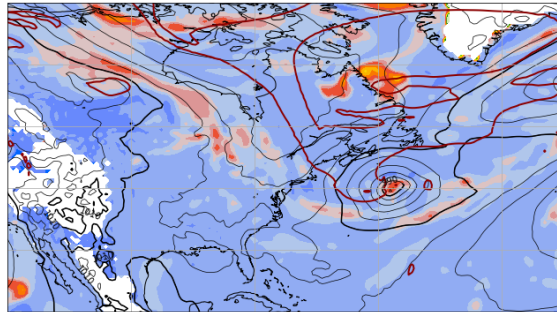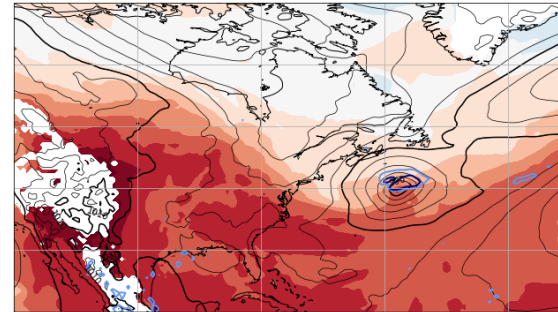

60°N  
50°N  
40°N  
30°N

06 UTC on 10 September 1978

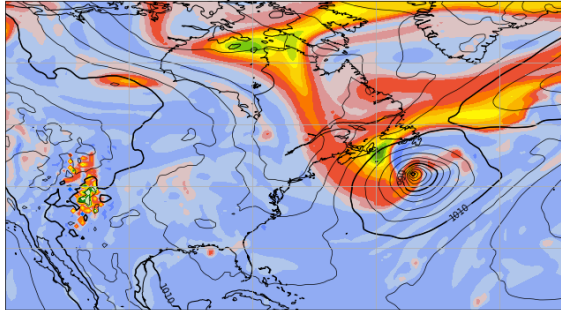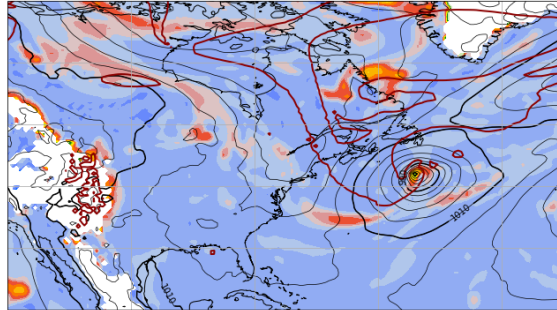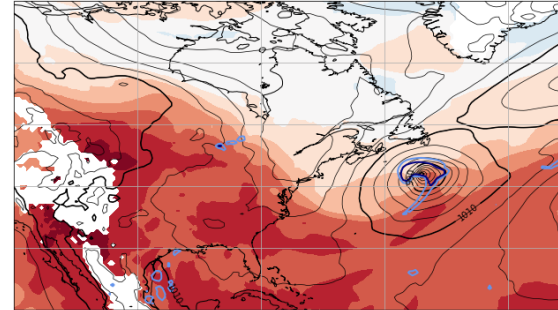

60°N  
50°N  
40°N  
30°N

12 UTC on 10 September 1978

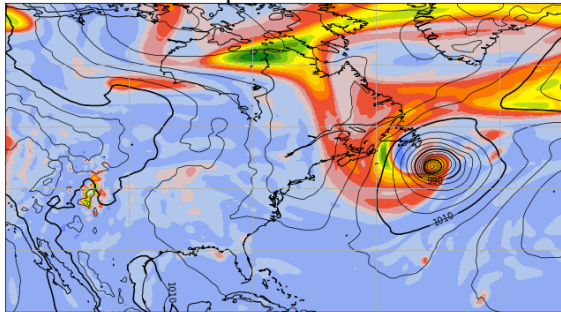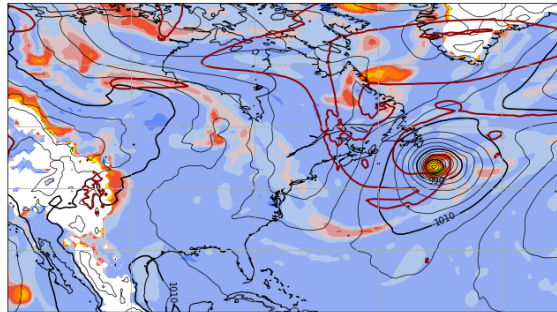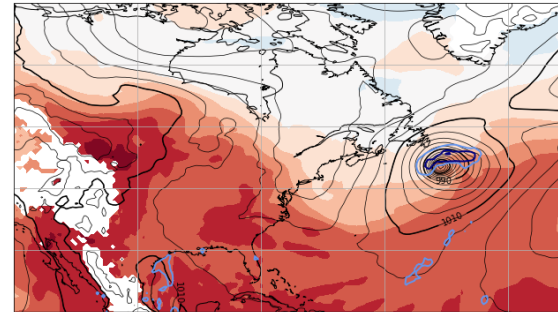

60°N  
50°N  
40°N  
30°N

18 UTC on 10 September 1978

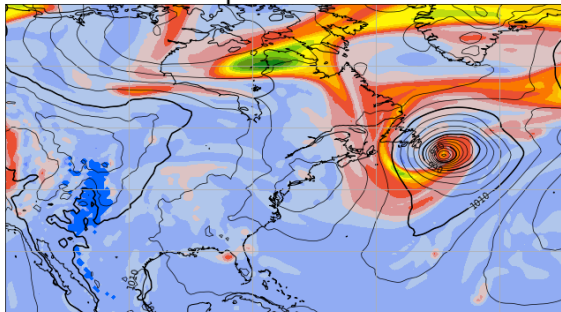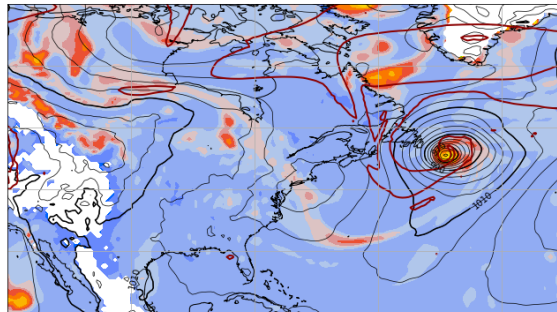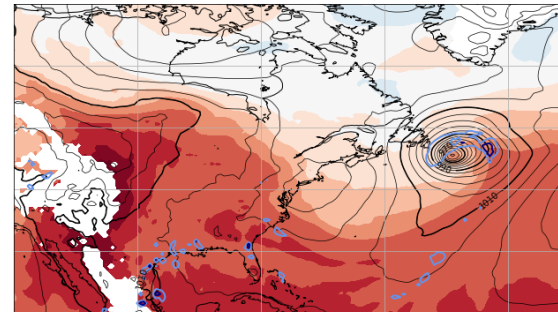

60°N  
50°N  
40°N  
30°N

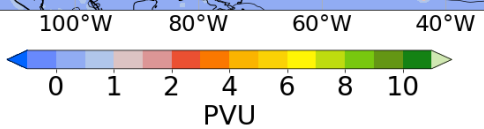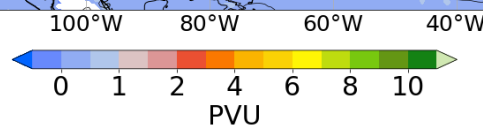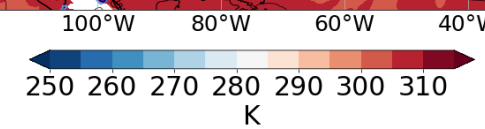

00 UTC on 11 September 1978

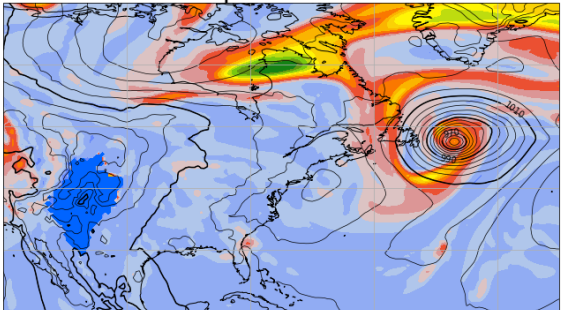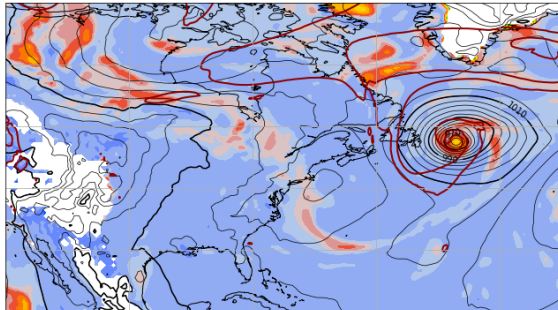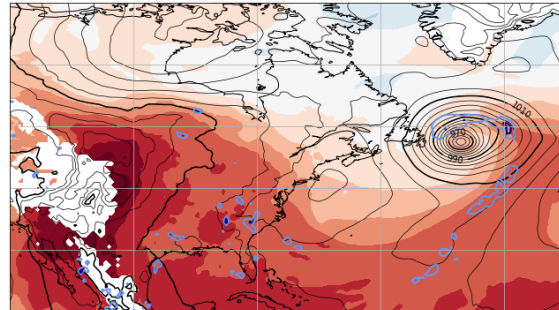

60°N  
50°N  
40°N  
30°N

06 UTC on 11 September 1978

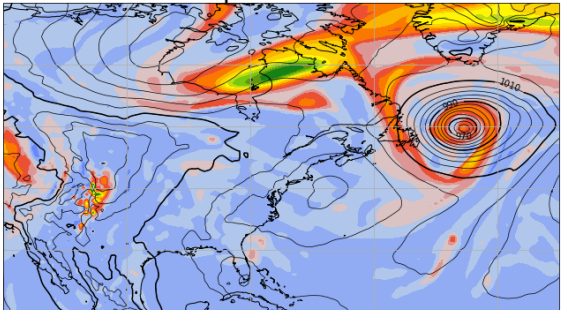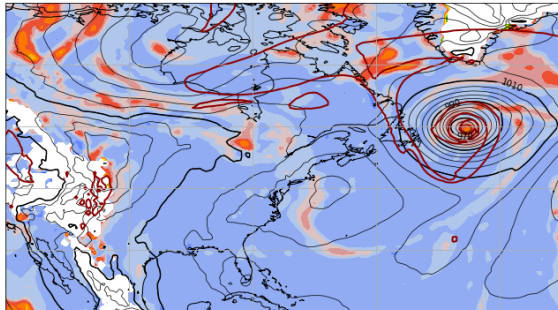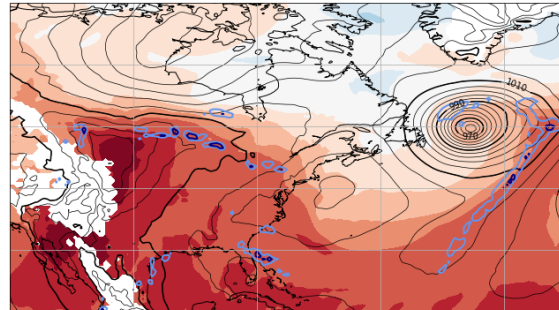

60°N  
50°N  
40°N  
30°N

12 UTC on 11 September 1978

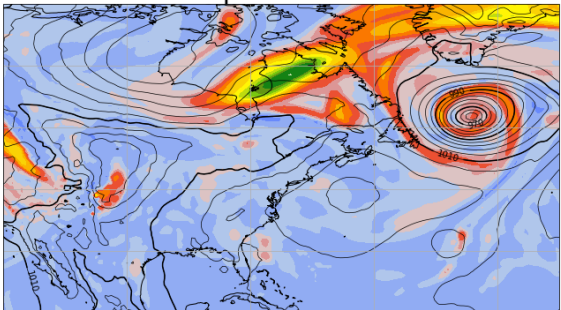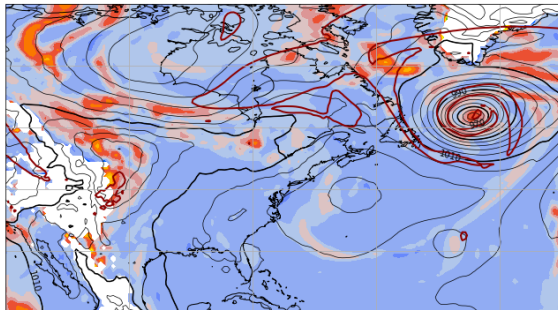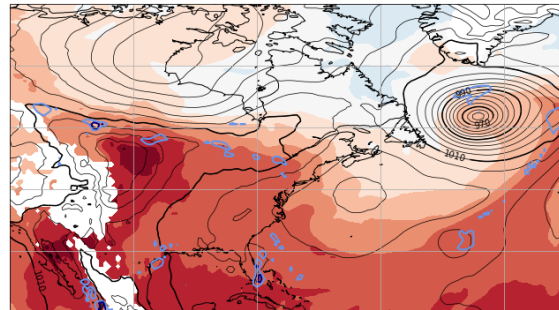

60°N  
50°N  
40°N  
30°N

18 UTC on 11 September 1978

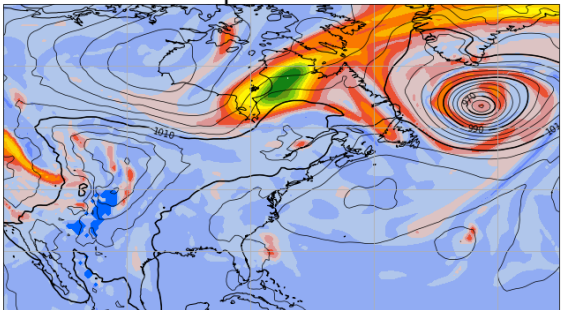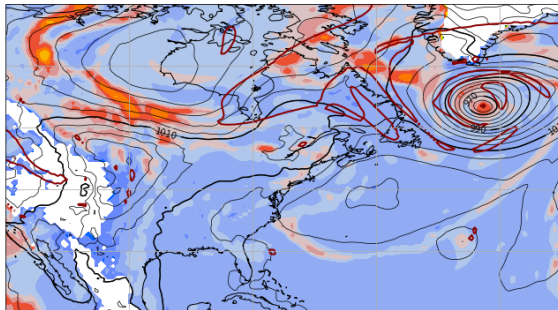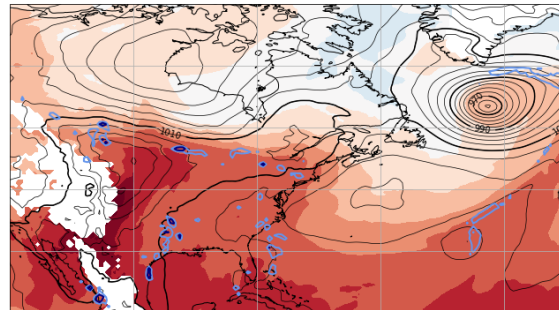

60°N  
50°N  
40°N  
30°N

100°W 80°W 60°W 40°W

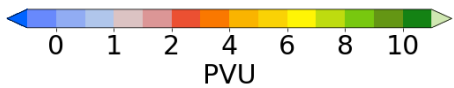

100°W 80°W 60°W 40°W

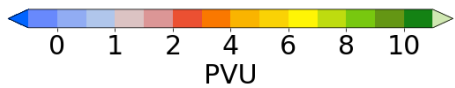

100°W 80°W 60°W 40°W

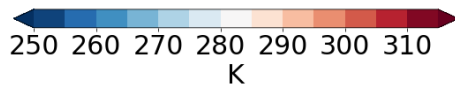

00 UTC on 12 September 1978

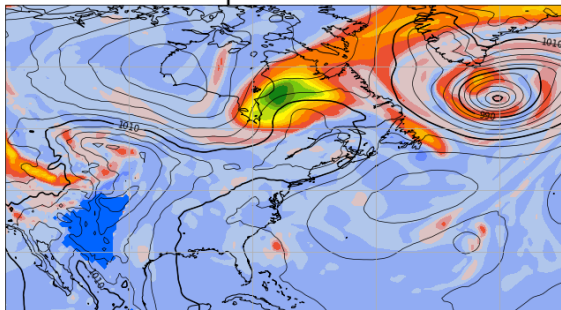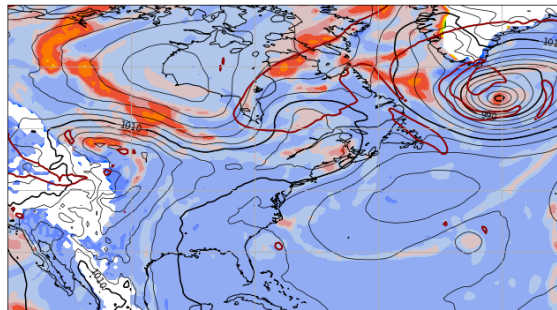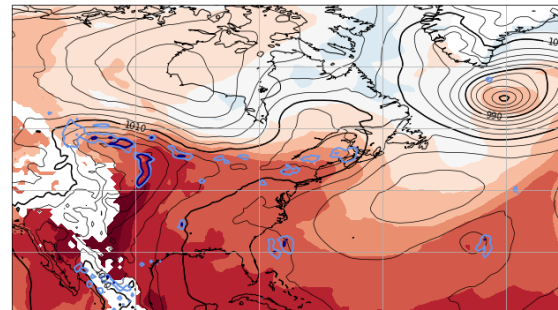

60°N  
50°N  
40°N  
30°N

06 UTC on 12 September 1978

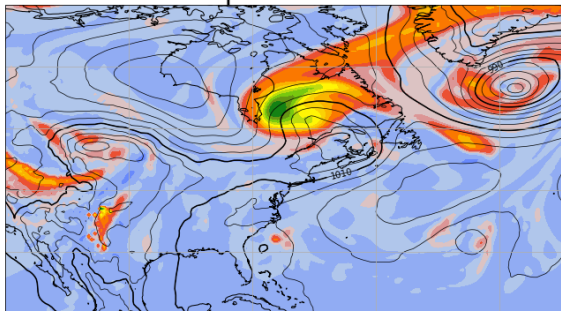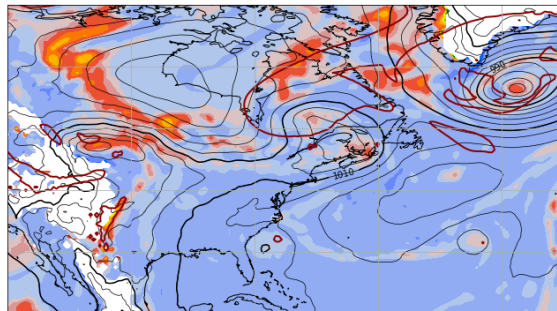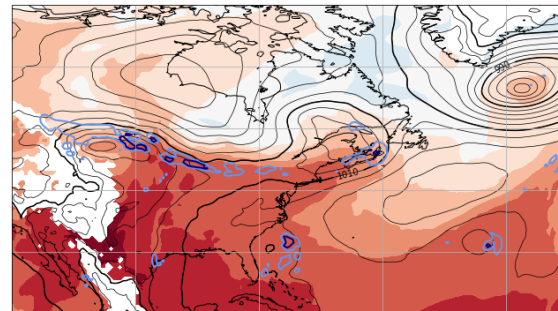

60°N  
50°N  
40°N  
30°N

12 UTC on 12 September 1978

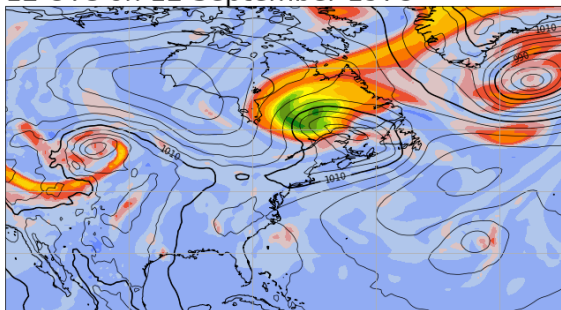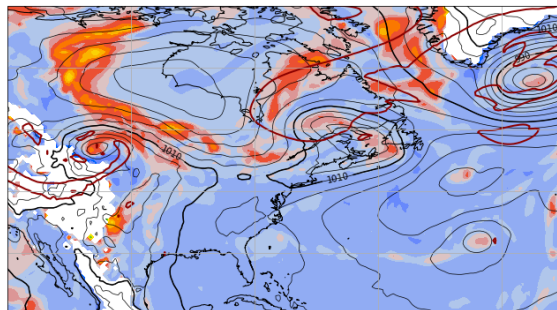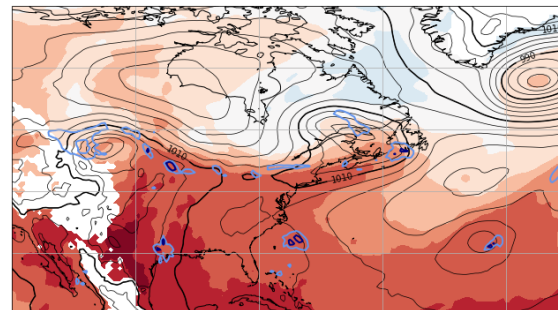

60°N  
50°N  
40°N  
30°N

18 UTC on 12 September 1978

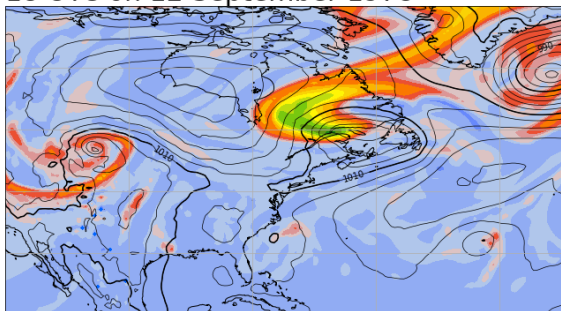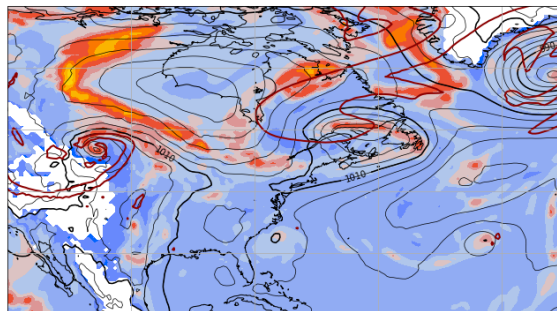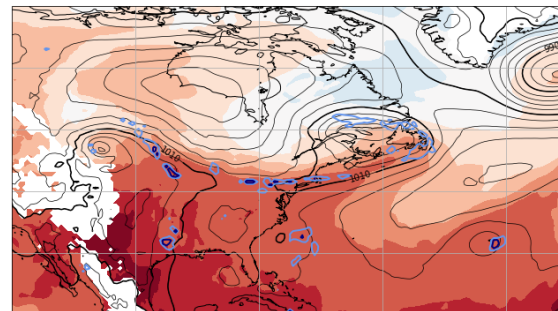

60°N  
50°N  
40°N  
30°N

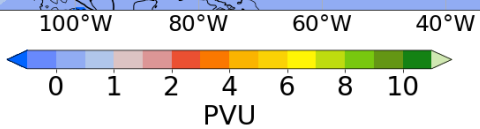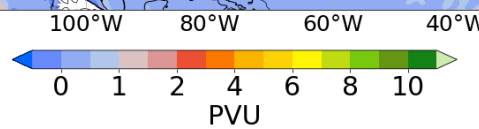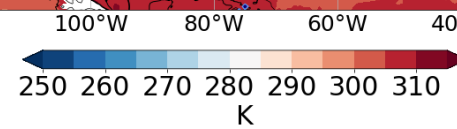





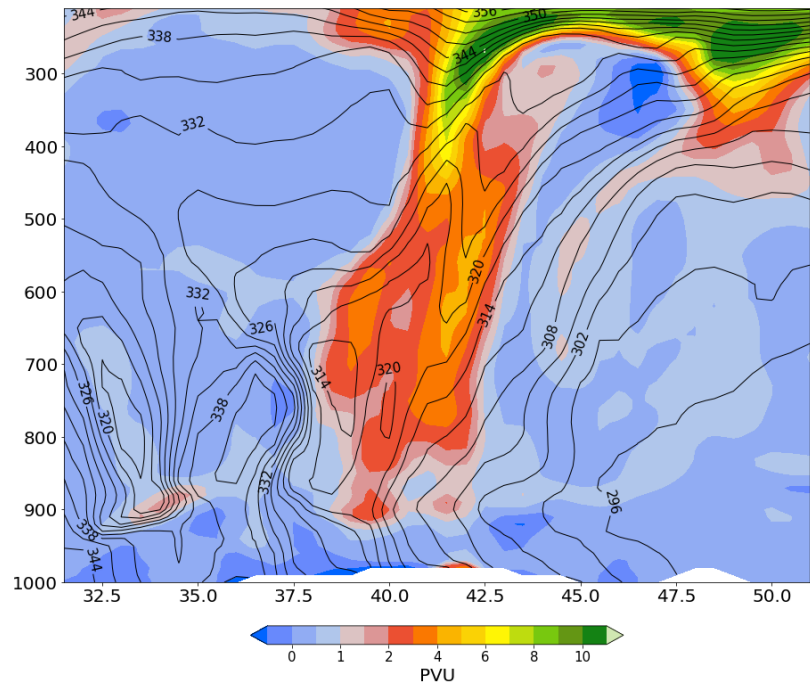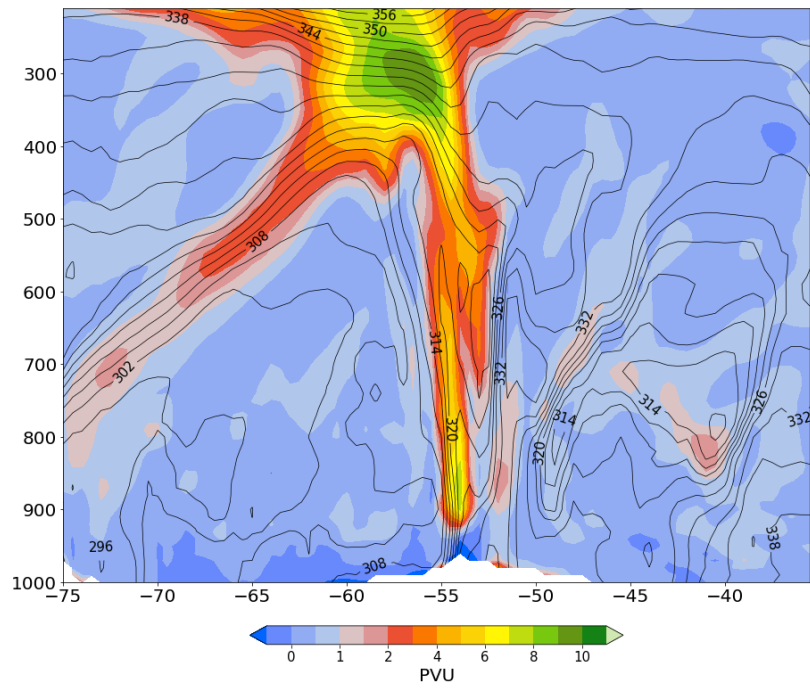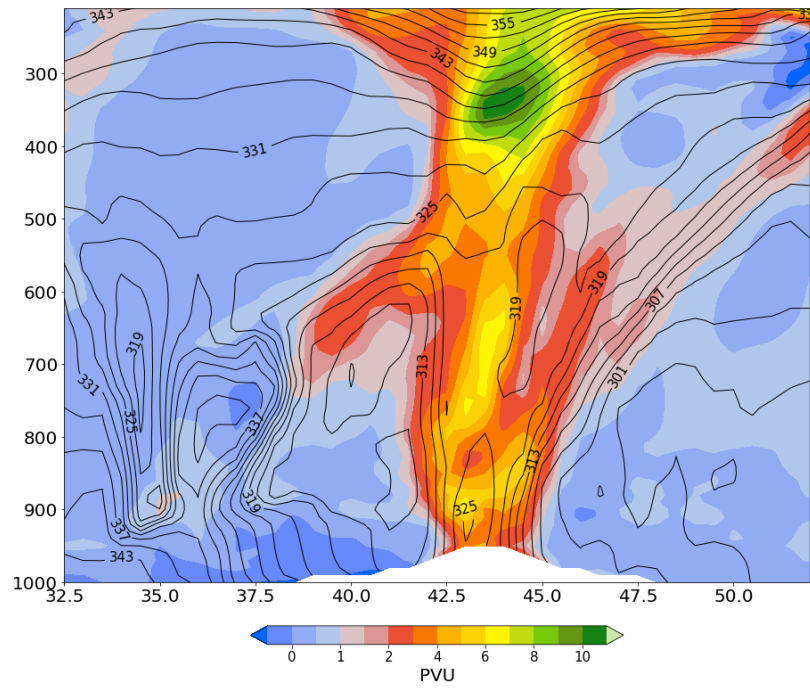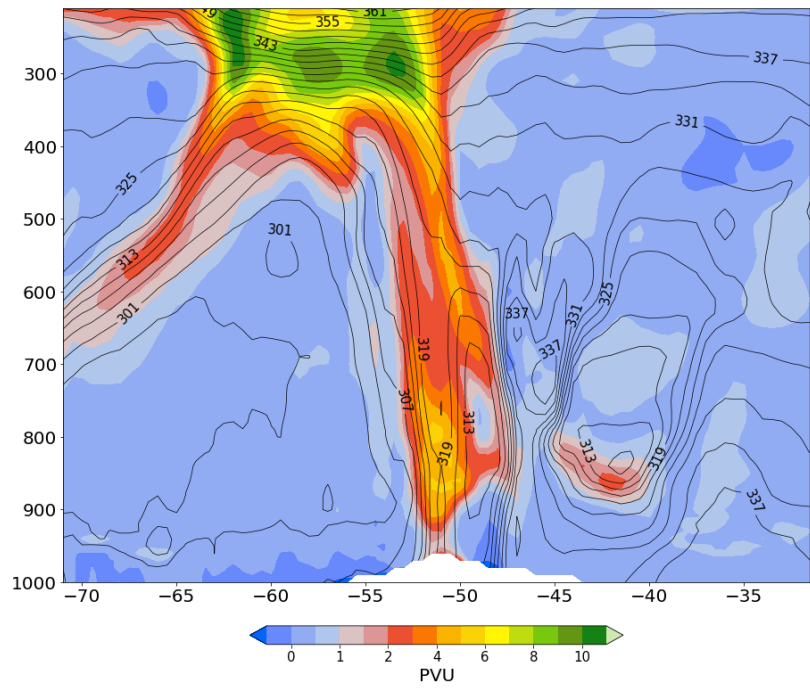

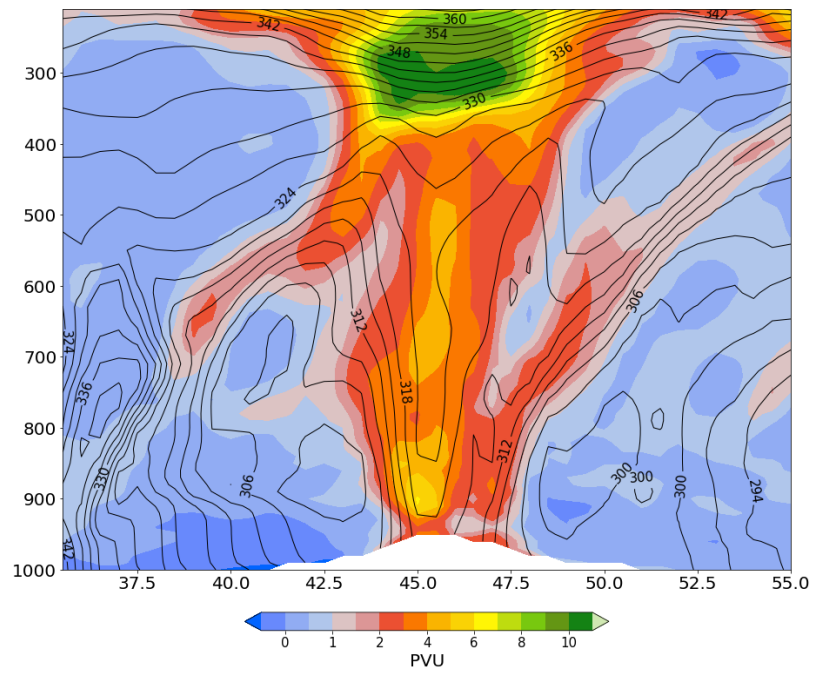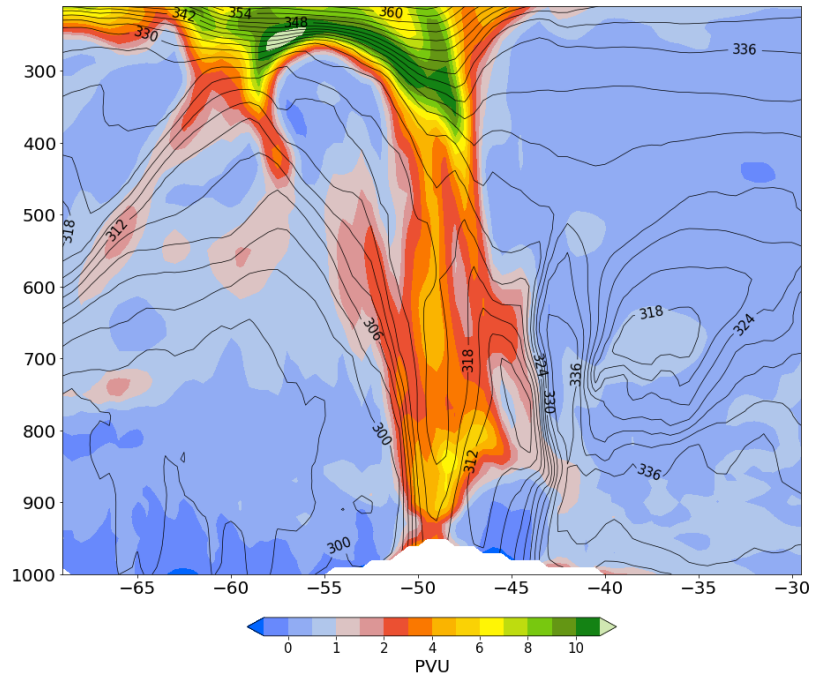

# President's Day cyclone

Horizontal maps from 00 UTC on 17 February – 18 UTC on 22 February 1979

Vertical cross sections from 12 UTC on 19 February – 18 UTC on 20 February 1979

meridional cross sections (S to N)

| date        | cyclone center | cross sections |               | minimum MSLP |
|-------------|----------------|----------------|---------------|--------------|
|             |                | from           | to            |              |
| 19790219_12 | 75°W / 36°N    | 75°W / 26°N    | 75°W / 46°N   | 1010 hPa     |
| 19790219_18 | 74°W / 37.5°N  | 74°W / 27.5°N  | 74°W / 47.5°N | 994 hPa      |
| 19790220_00 | 69°W / 37.5°N  | 69°W / 27.5°N  | 69°W / 47.5°N | 994 hPa      |
| 19790220_06 | 65°W / 37°N    | 65°W / 27°N    | 65°W / 47°N   | 994 hPa      |
| 19790220_12 | 59°W / 37°N    | 59°W / 27°N    | 59°W / 47°N   | 990 hPa      |
| 19790220_18 | 55°W / 38°N    | 55°W / 28°N    | 55°W / 48°N   | 990 hPa      |

zonal cross sections (W to E)

| date        | cyclone center | cross sections |               | minimum MSLP |
|-------------|----------------|----------------|---------------|--------------|
|             |                | from           | to            |              |
| 19790219_12 | 75°W / 36°N    | 95°W / 36°N    | 55°W / 36°N   | 1010 hPa     |
| 19790219_18 | 74°W / 37.5°N  | 94°W / 37.5°N  | 54°W / 37.5°N | 994 hPa      |
| 19790220_00 | 69°W / 37.5°N  | 89°W / 37.5°N  | 49°W / 37.5°N | 994 hPa      |
| 19790220_06 | 65°W / 37°N    | 85°W / 37°N    | 45°W / 37°N   | 994 hPa      |
| 19790220_12 | 59°W / 37°N    | 79°W / 37°N    | 39°W / 37°N   | 990 hPa      |
| 19790220_18 | 55°W / 38°N    | 75°W / 38°N    | 35°W / 38°N   | 990 hPa      |

00 UTC on 17 February 1979

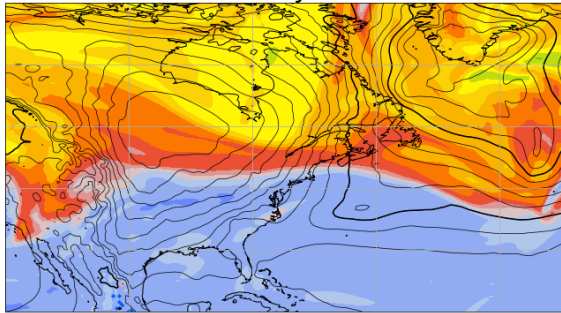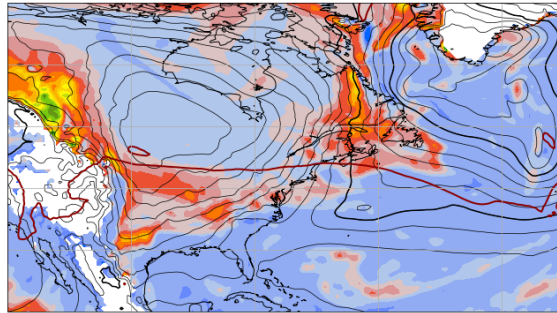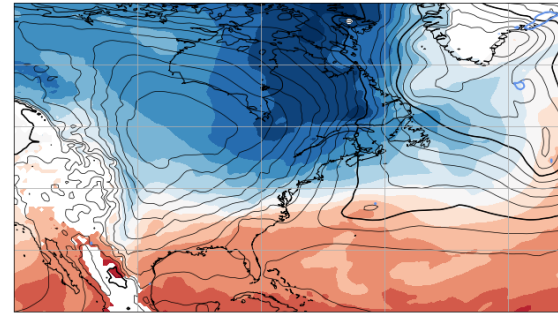

60°N  
50°N  
40°N  
30°N

06 UTC on 17 February 1979

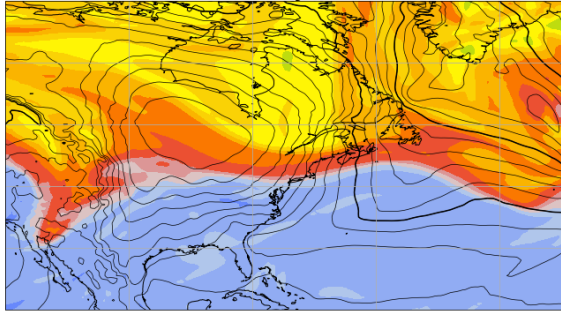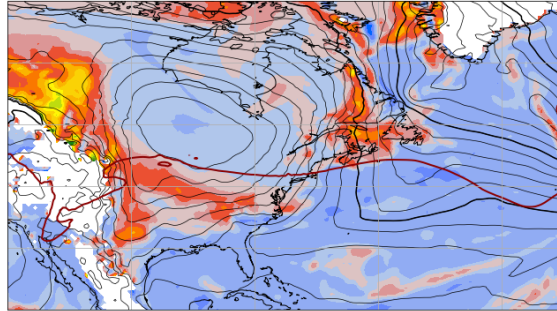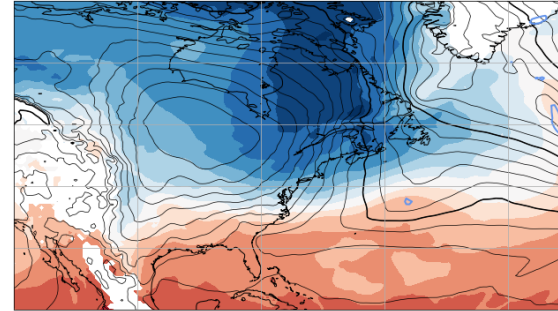

60°N  
50°N  
40°N  
30°N

12 UTC on 17 February 1979

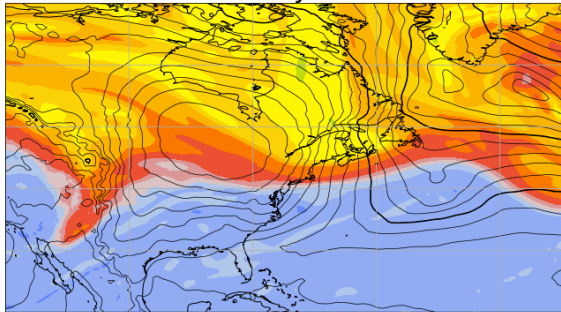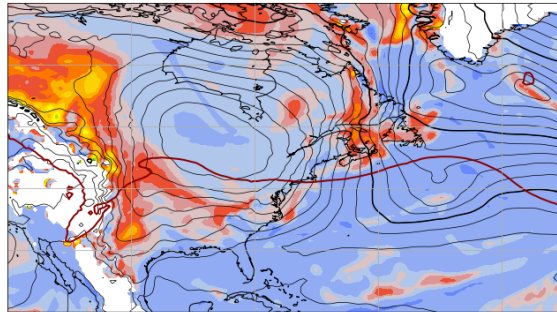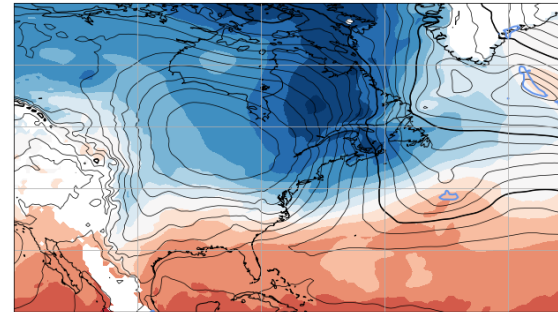

60°N  
50°N  
40°N  
30°N

18 UTC on 17 February 1979

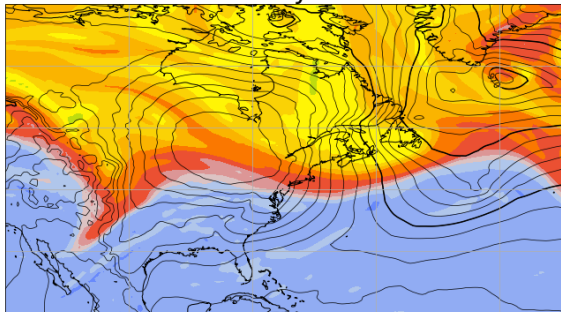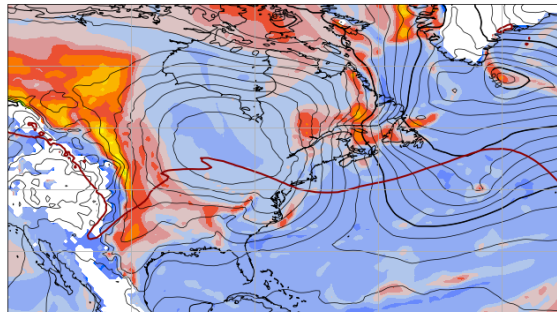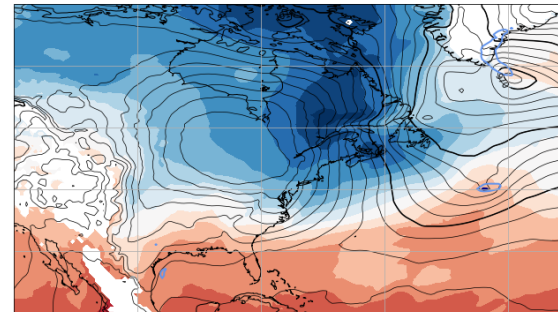

60°N  
50°N  
40°N  
30°N

100°W 80°W 60°W 40°W

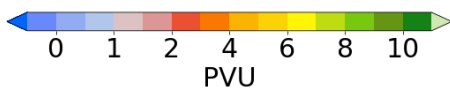

100°W 80°W 60°W 40°W

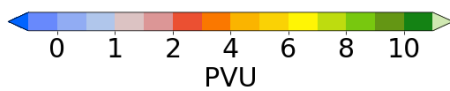

100°W 80°W 60°W 40°W

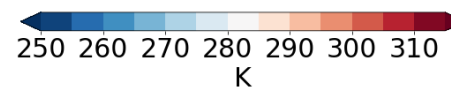

00 UTC on 18 February 1979

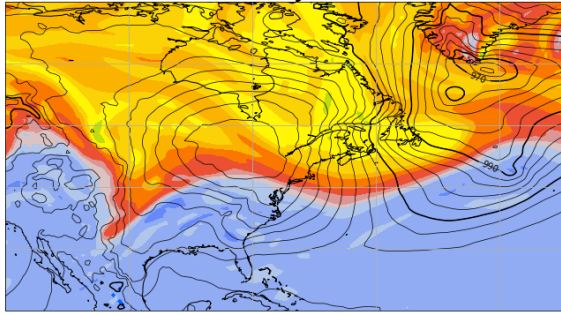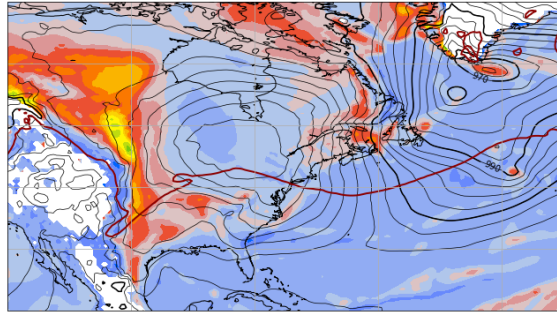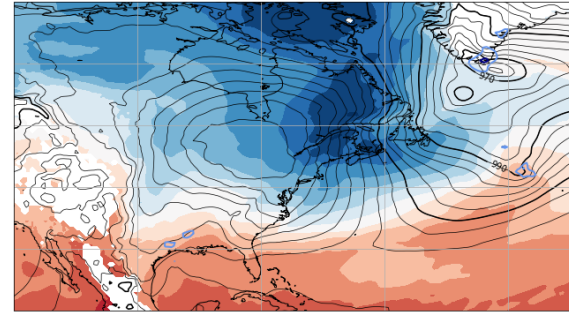

60°N  
50°N  
40°N  
30°N

06 UTC on 18 February 1979

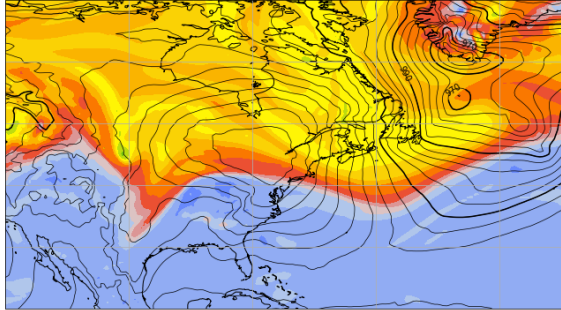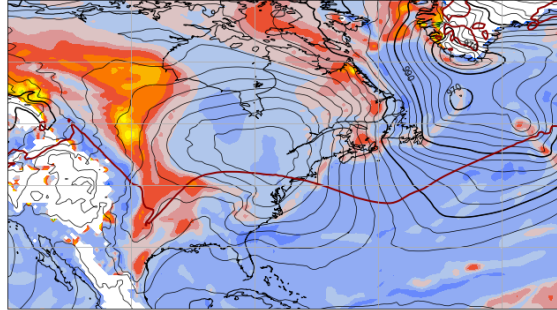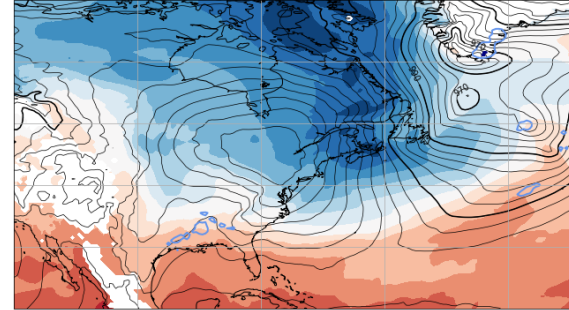

60°N  
50°N  
40°N  
30°N

12 UTC on 18 February 1979

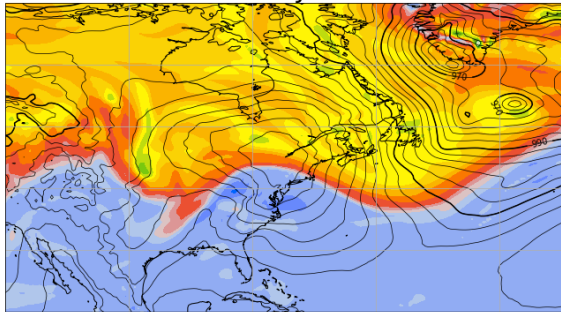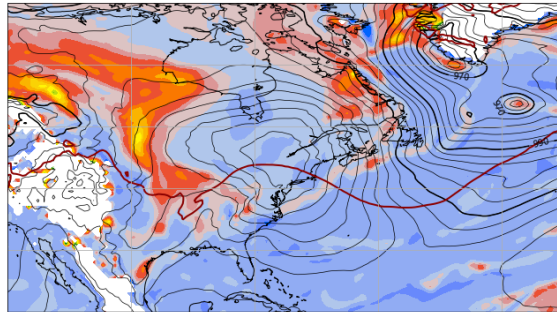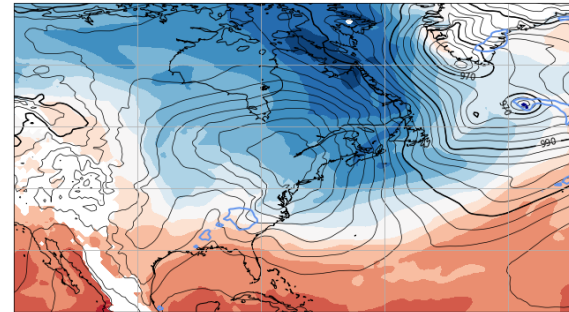

60°N  
50°N  
40°N  
30°N

18 UTC on 18 February 1979

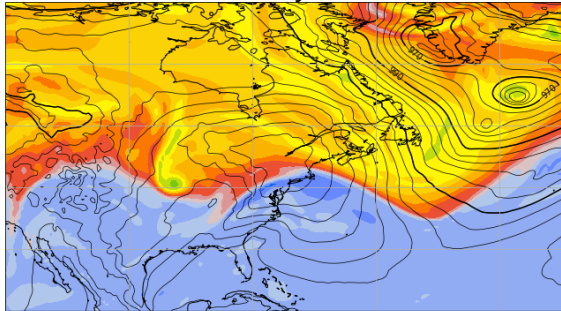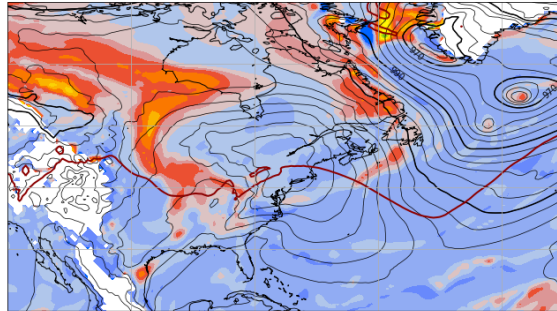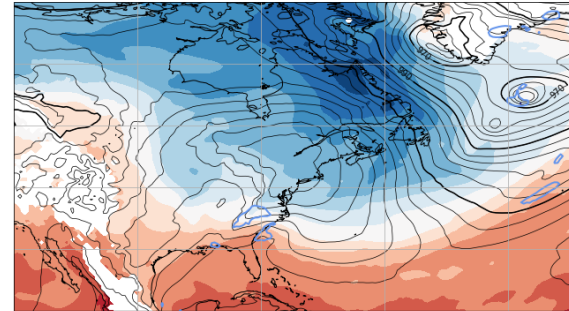

60°N  
50°N  
40°N  
30°N

100°W 80°W 60°W 40°W

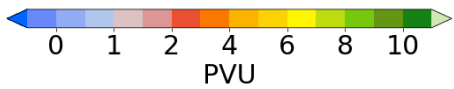

100°W 80°W 60°W 40°W

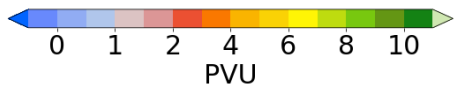

100°W 80°W 60°W 40°W

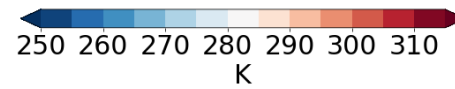

00 UTC on 19 February 1979

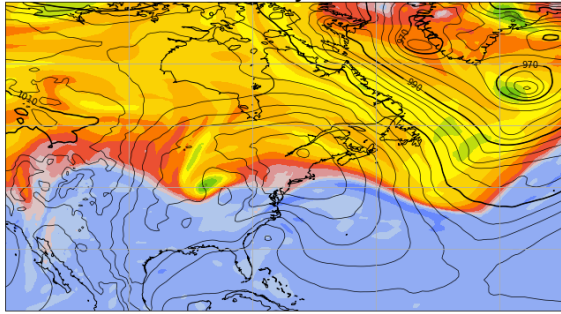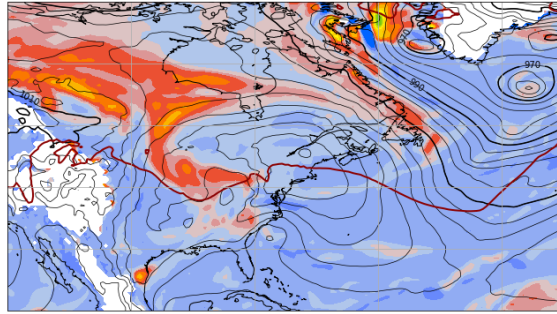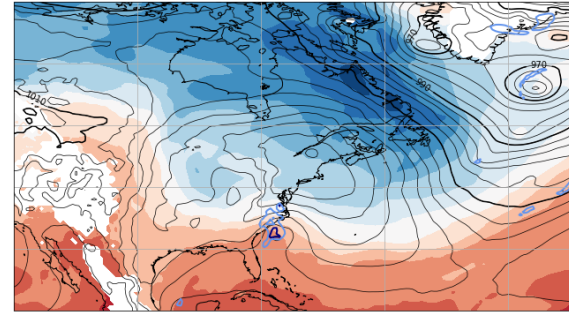

60°N  
50°N  
40°N  
30°N

06 UTC on 19 February 1979

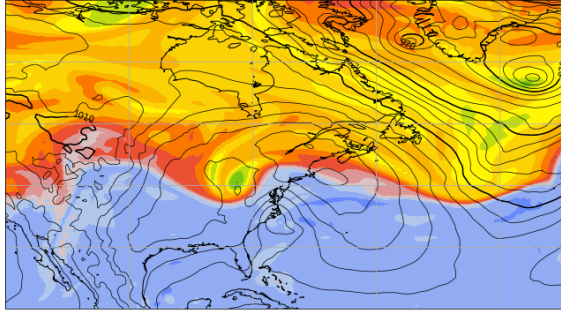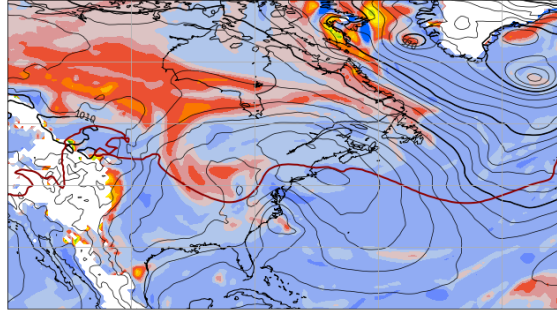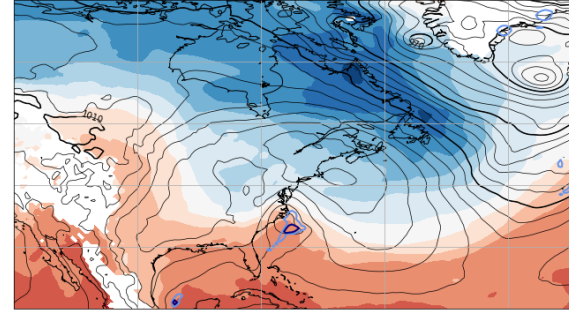

60°N  
50°N  
40°N  
30°N

12 UTC on 19 February 1979

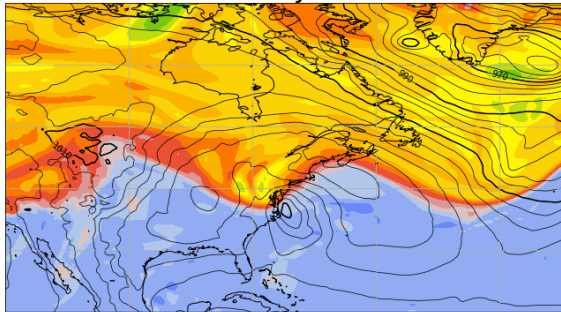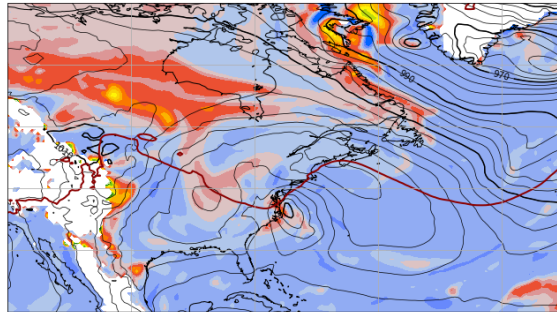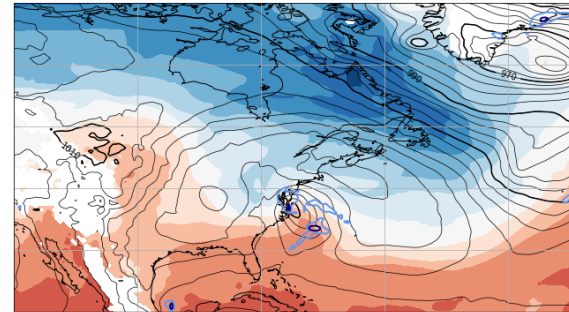

60°N  
50°N  
40°N  
30°N

18 UTC on 19 February 1979

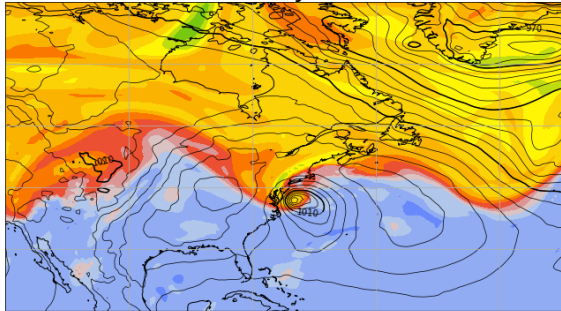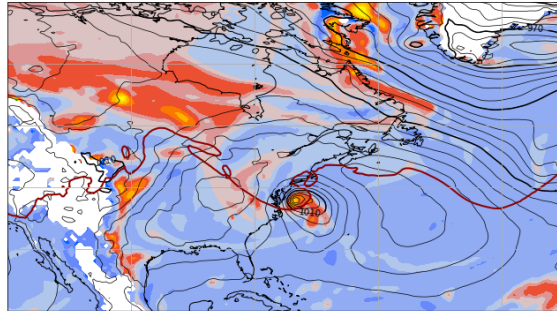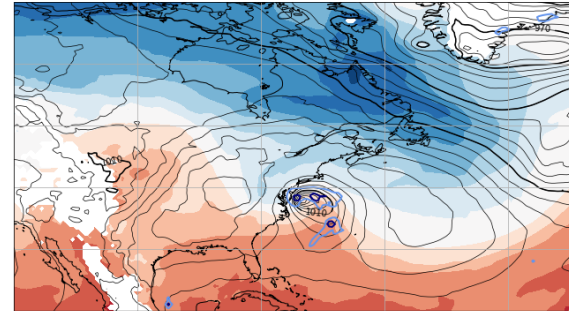

60°N  
50°N  
40°N  
30°N

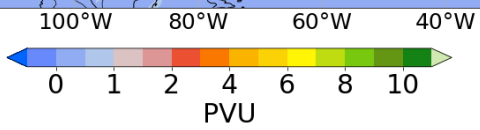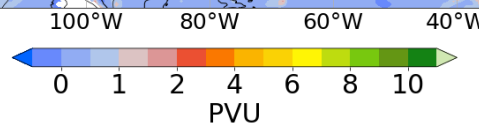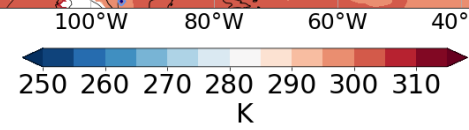

00 UTC on 20 February 1979

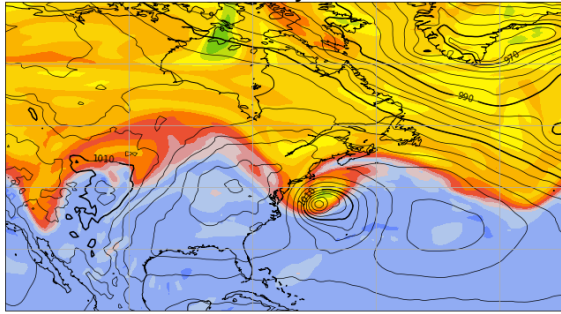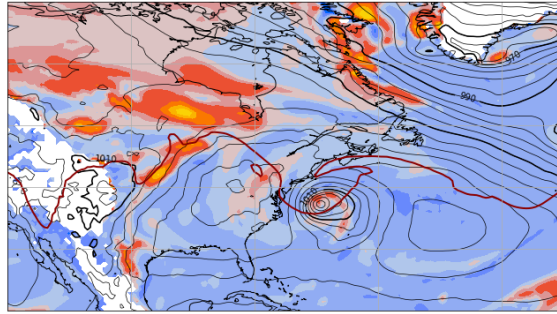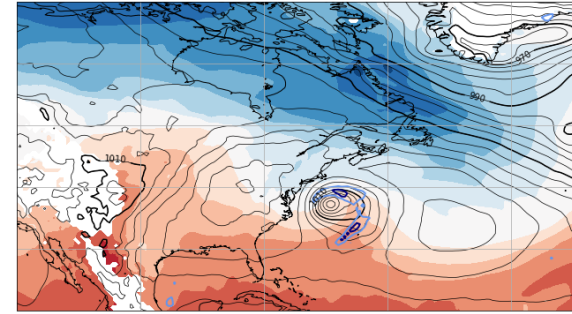

60°N  
50°N  
40°N  
30°N

06 UTC on 20 February 1979

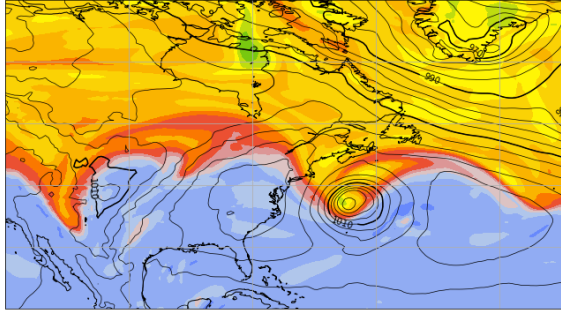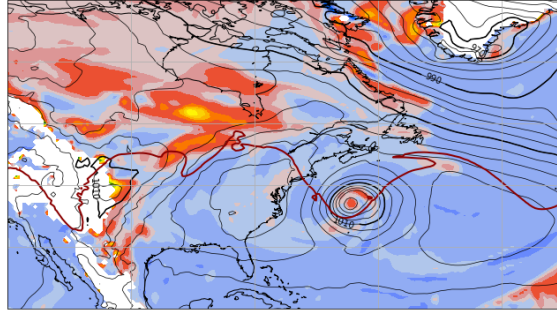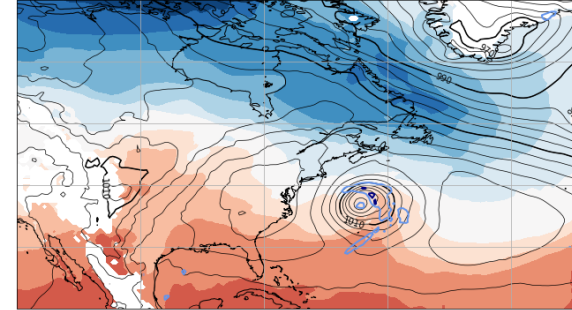

60°N  
50°N  
40°N  
30°N

12 UTC on 20 February 1979

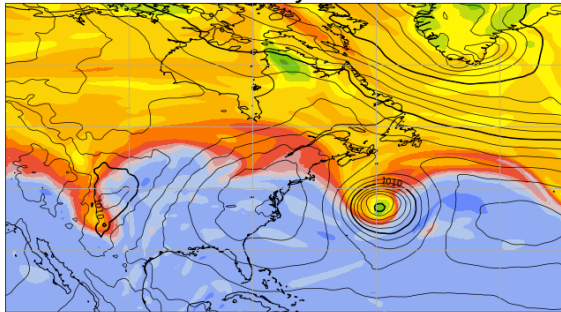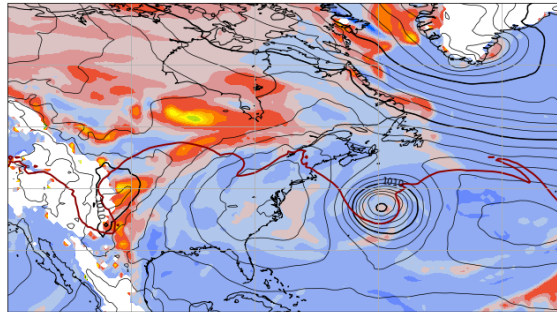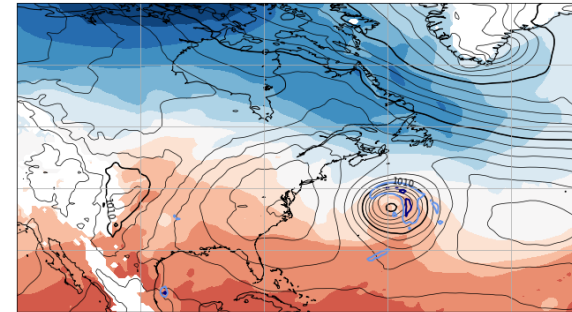

60°N  
50°N  
40°N  
30°N

18 UTC on 20 February 1979

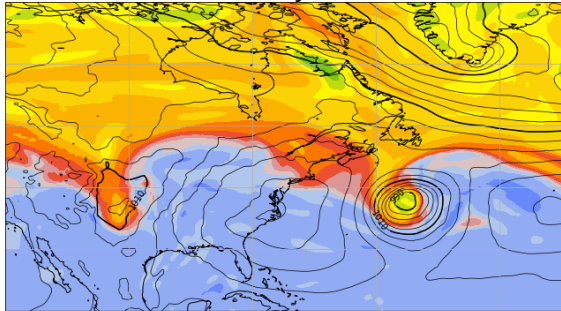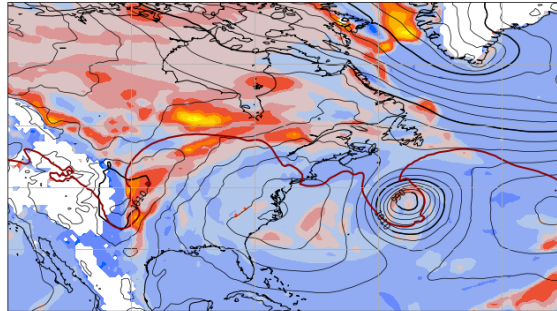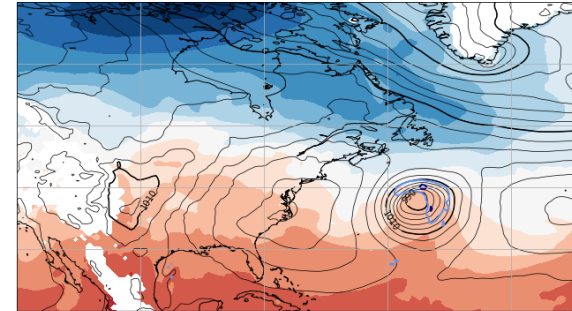

60°N  
50°N  
40°N  
30°N

100°W 80°W 60°W 40°W

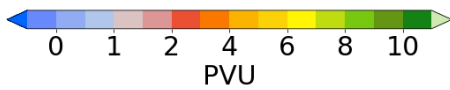

100°W 80°W 60°W 40°W

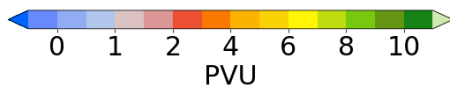

100°W 80°W 60°W 40°W

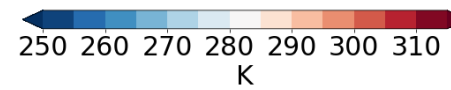

00 UTC on 21 February 1979

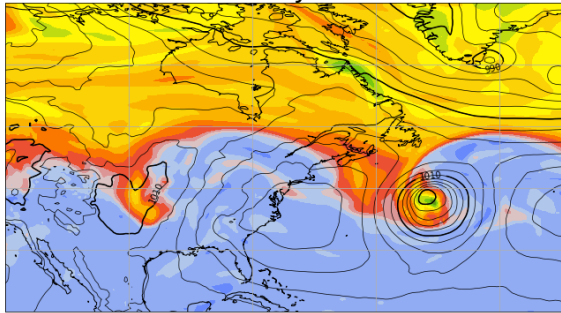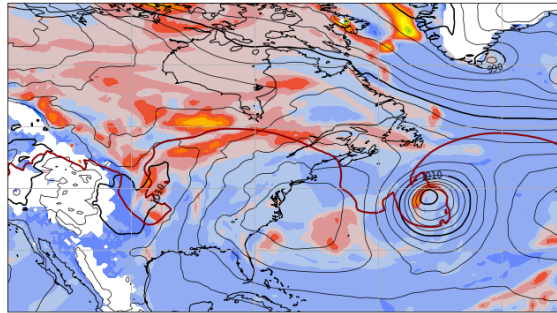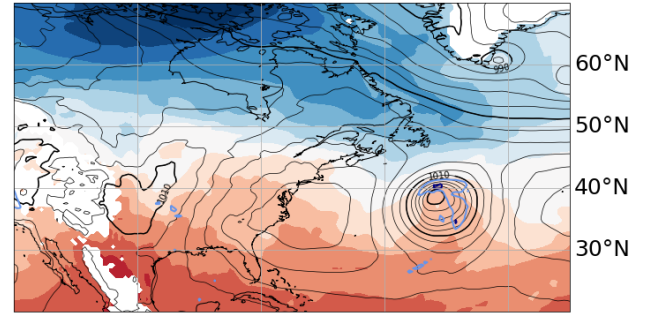

06 UTC on 21 February 1979

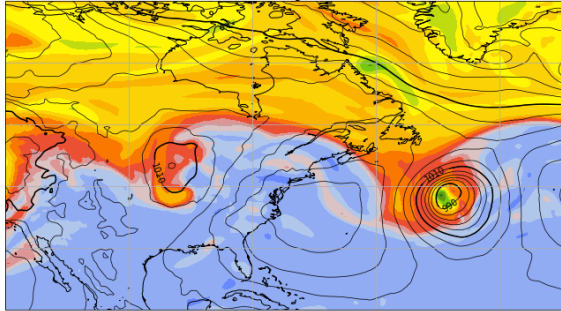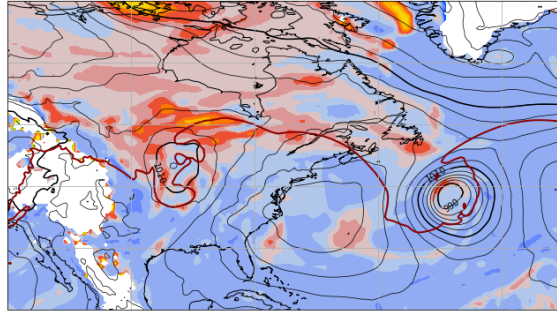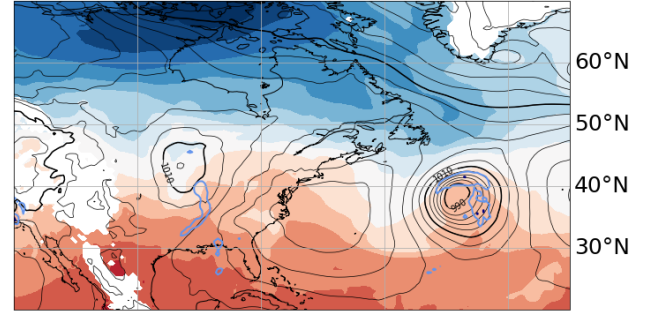

12 UTC on 21 February 1979

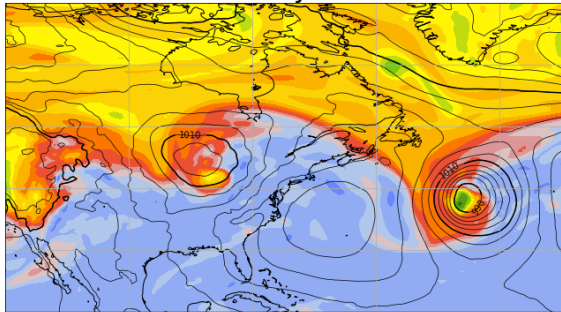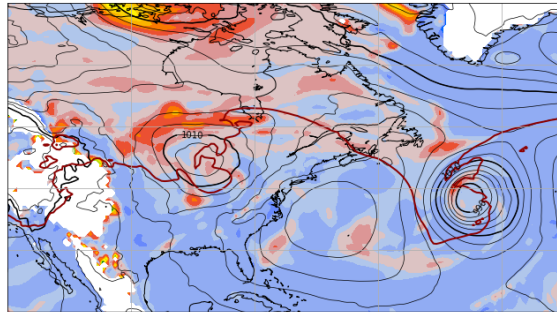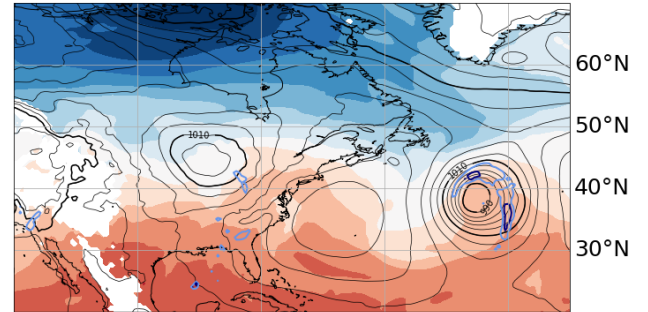

18 UTC on 21 February 1979

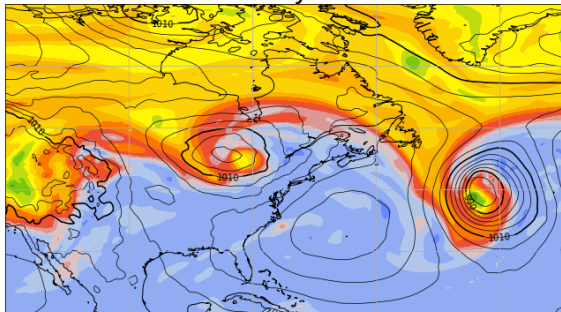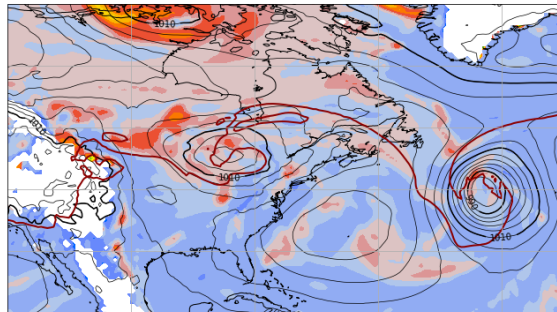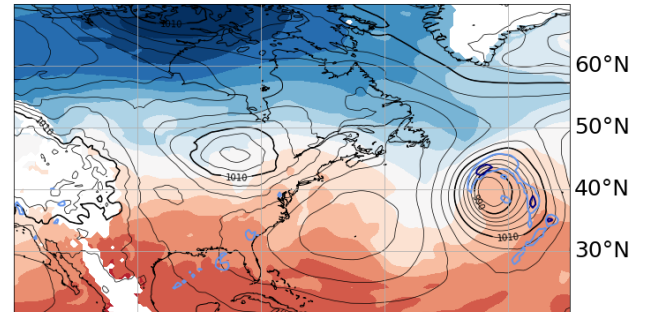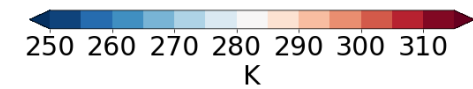



00 UTC on 22 February 1979

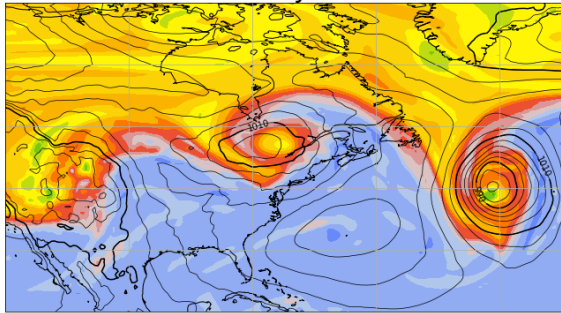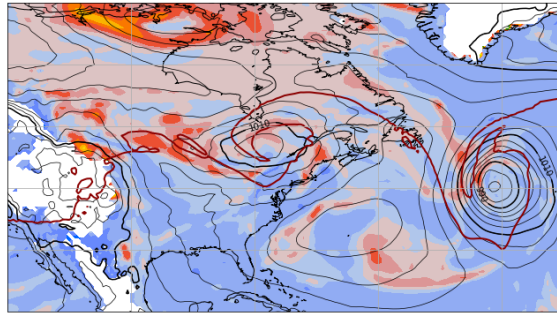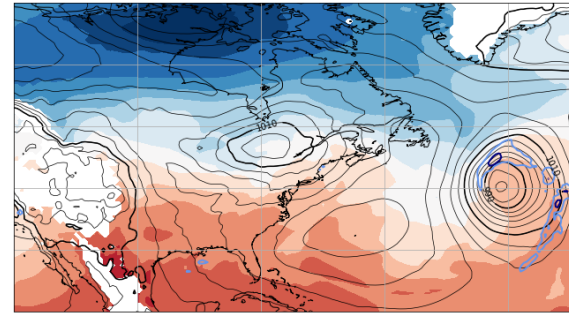

60°N  
50°N  
40°N  
30°N

06 UTC on 22 February 1979

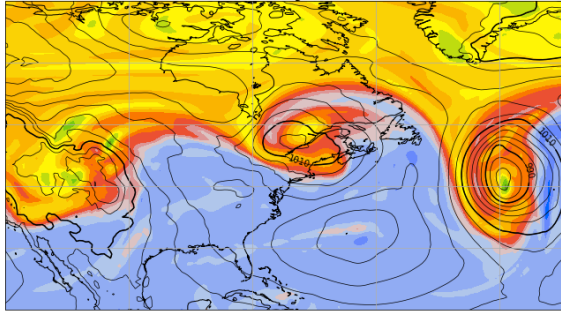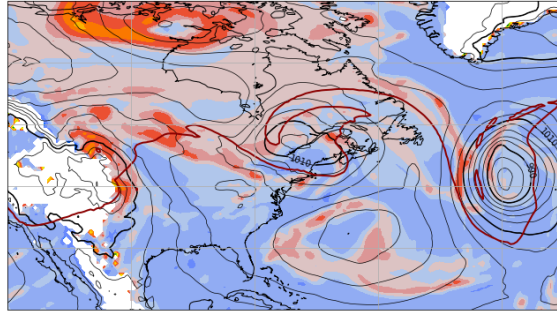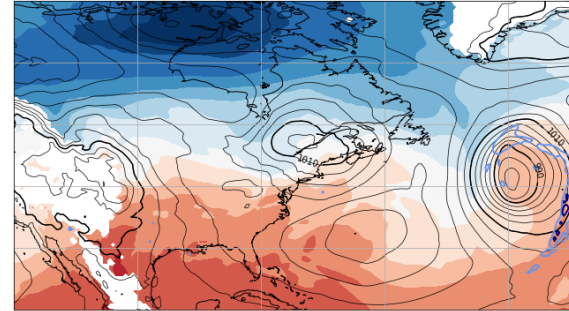

60°N  
50°N  
40°N  
30°N

12 UTC on 22 February 1979

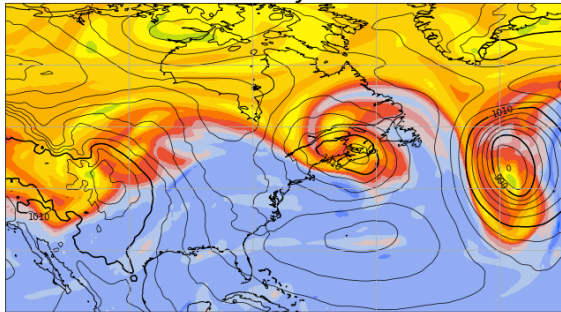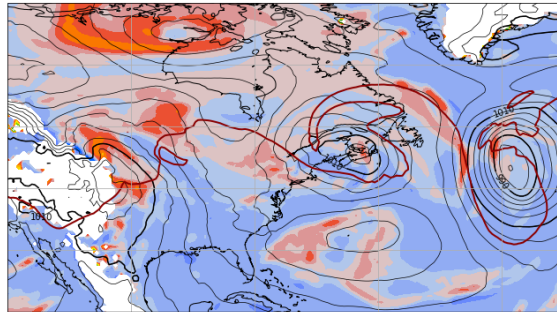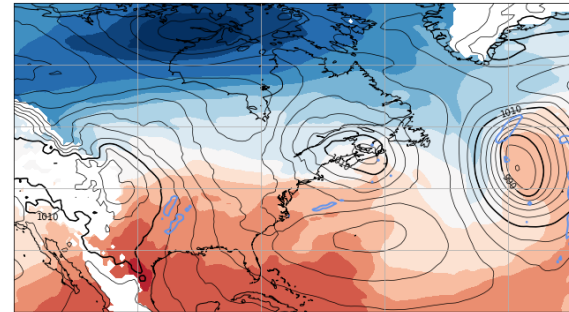

60°N  
50°N  
40°N  
30°N

18 UTC on 22 February 1979

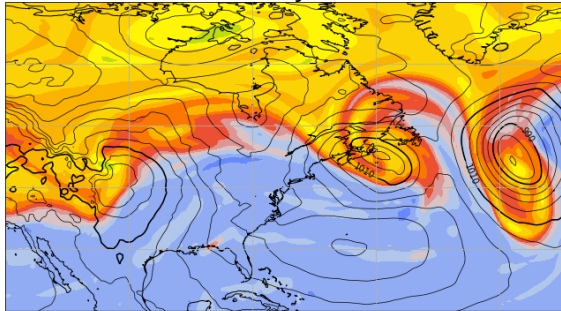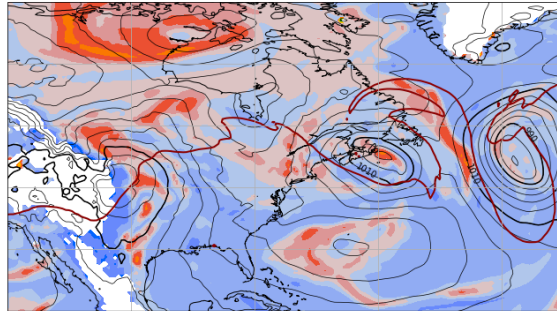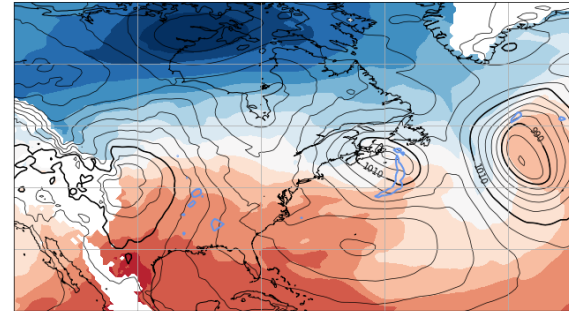

60°N  
50°N  
40°N  
30°N

100°W 80°W 60°W 40°W

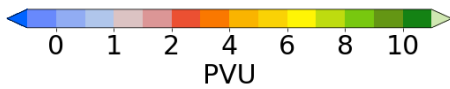

100°W 80°W 60°W 40°W

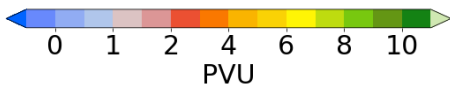

100°W 80°W 60°W 40°W

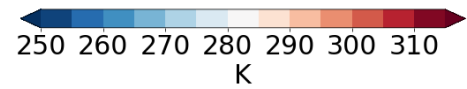

President's Day Cyclone 12 UTC 19 Feb to 18 UTC 20 Feb 1979

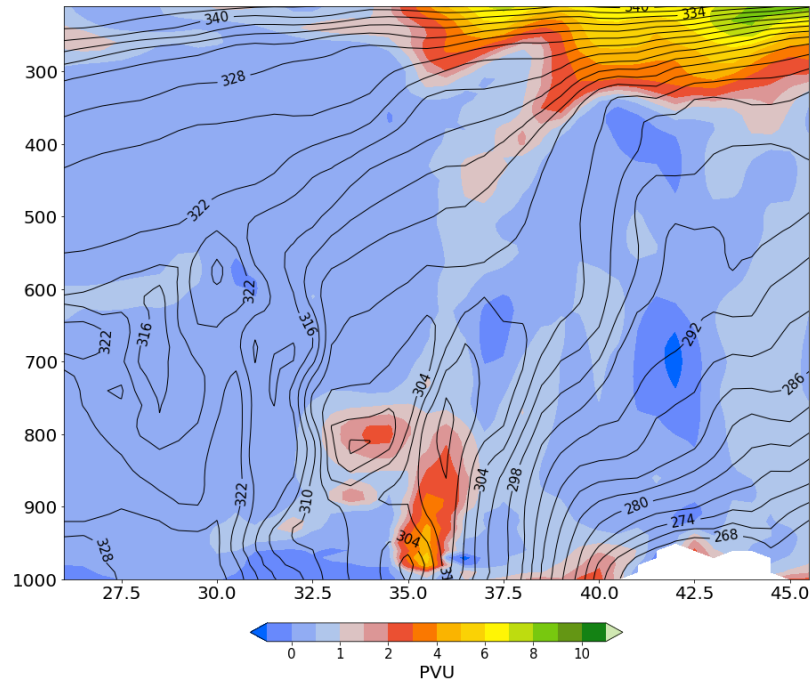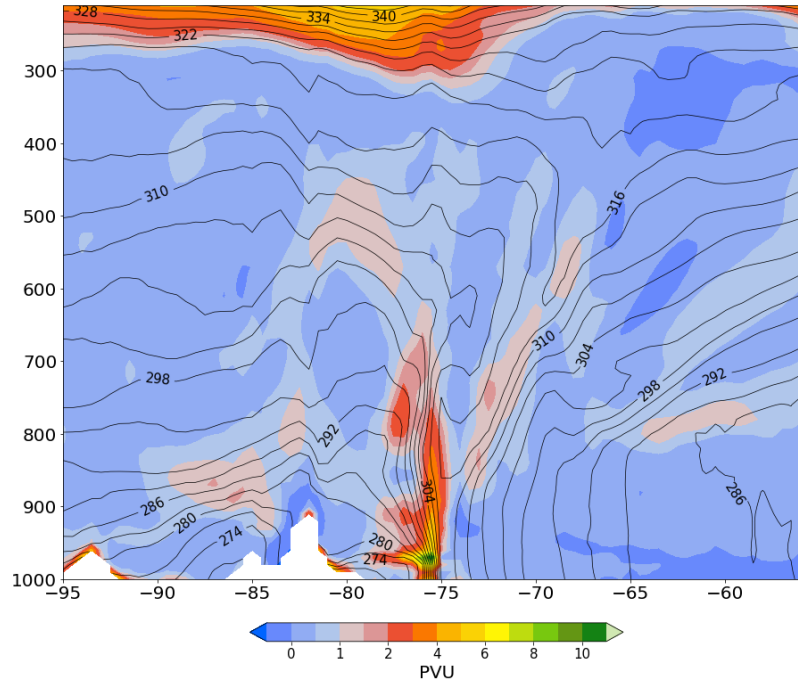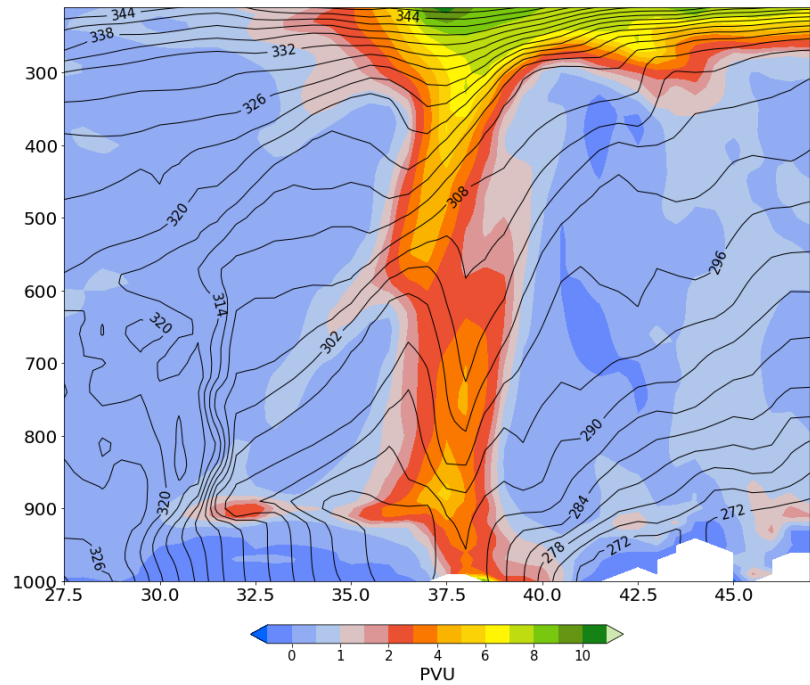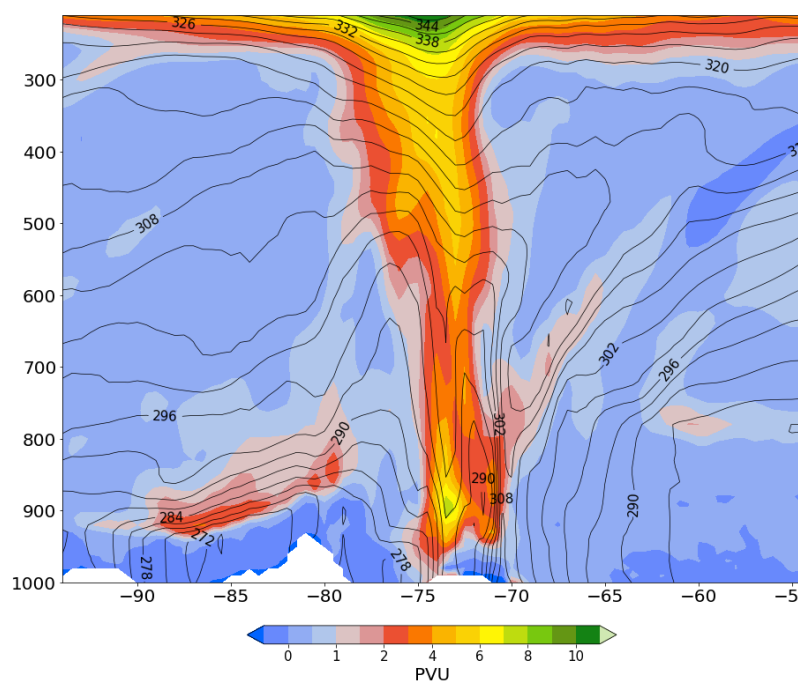

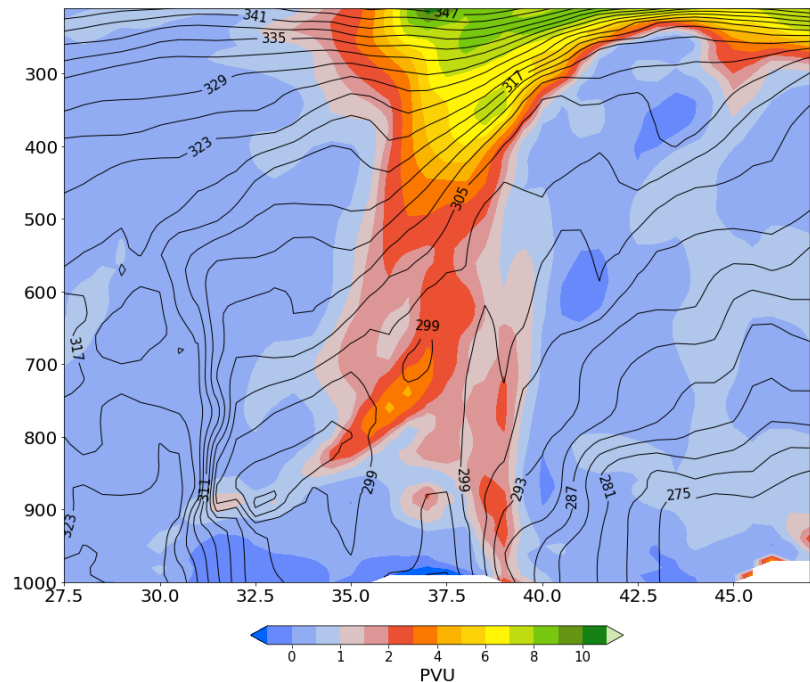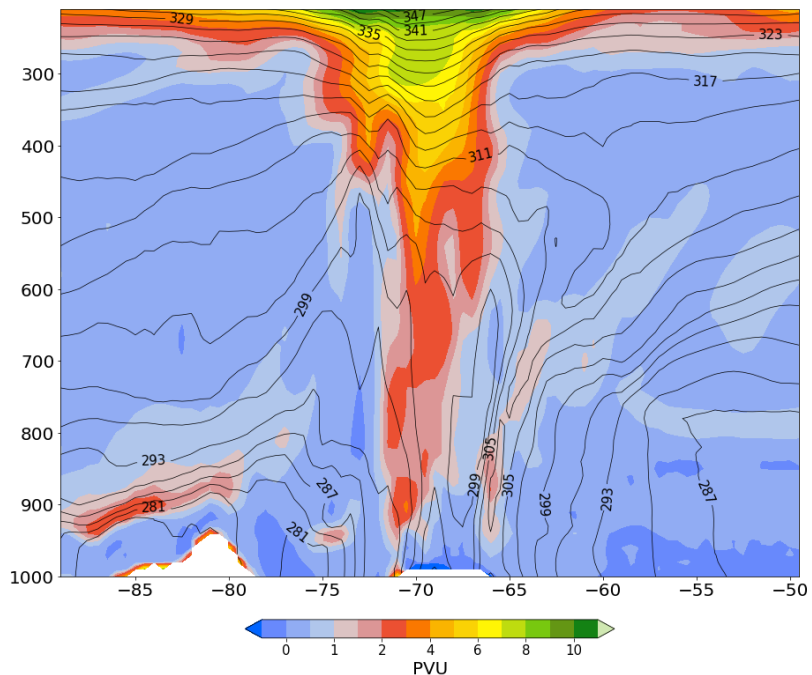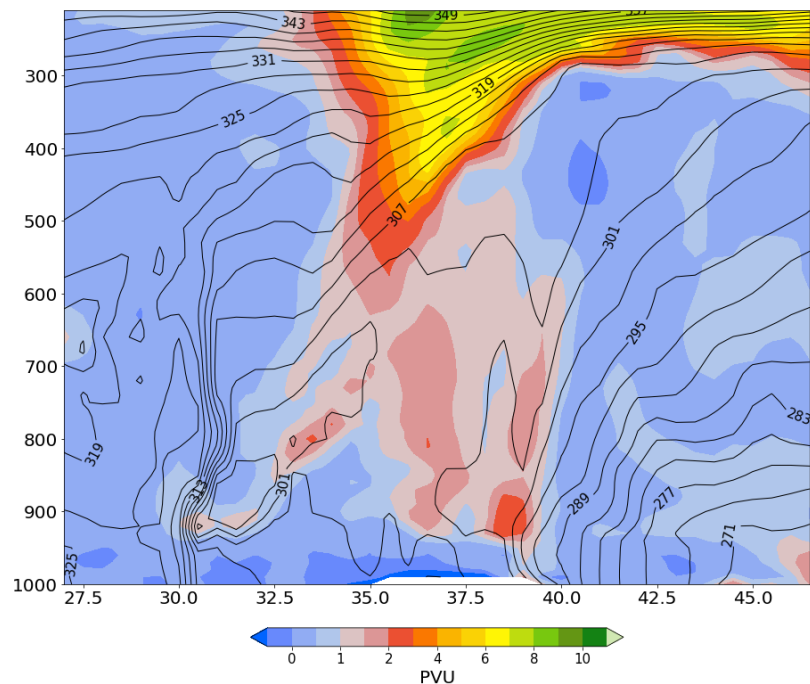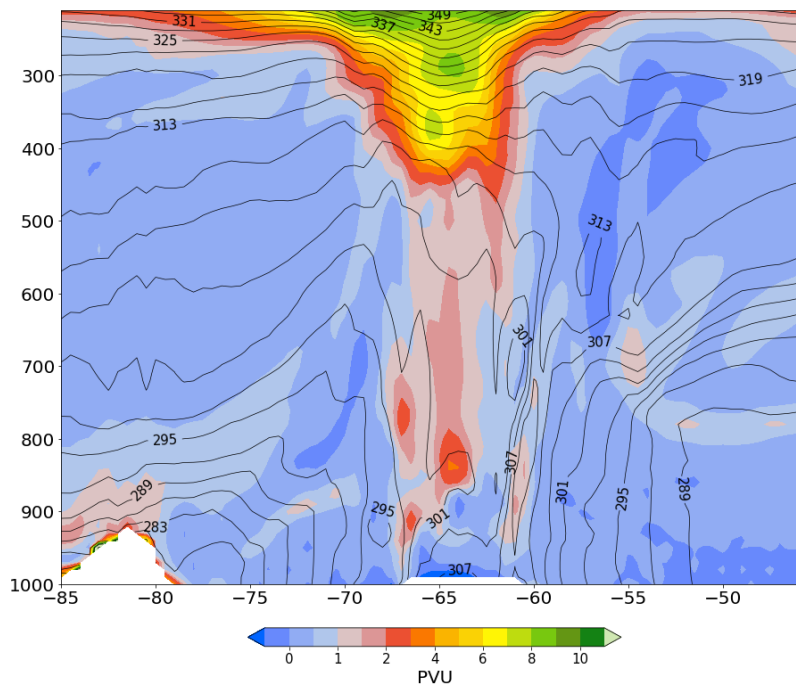

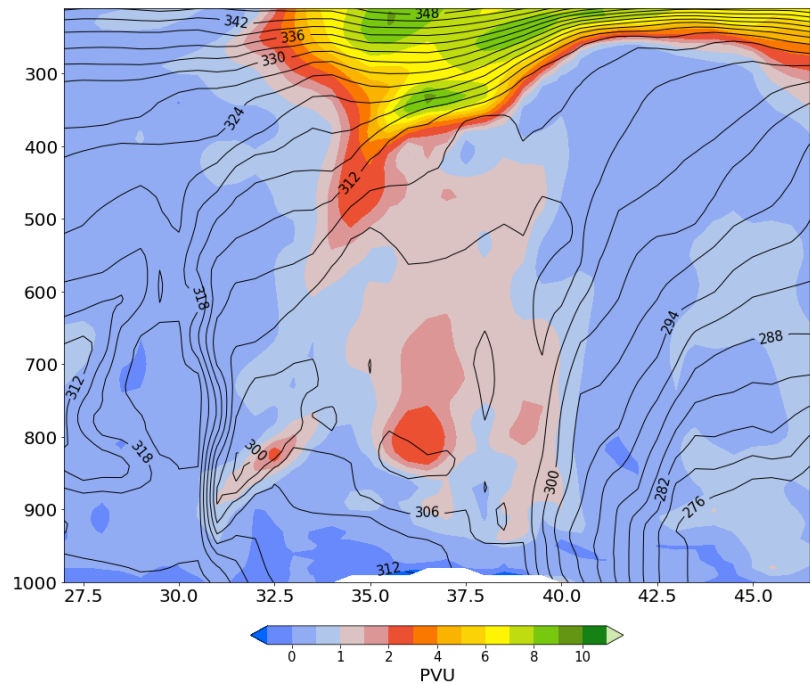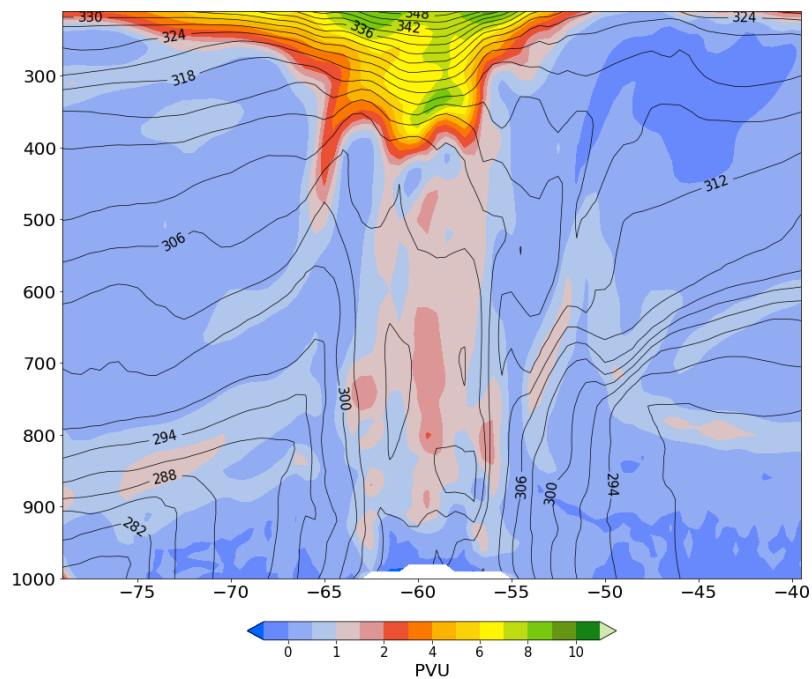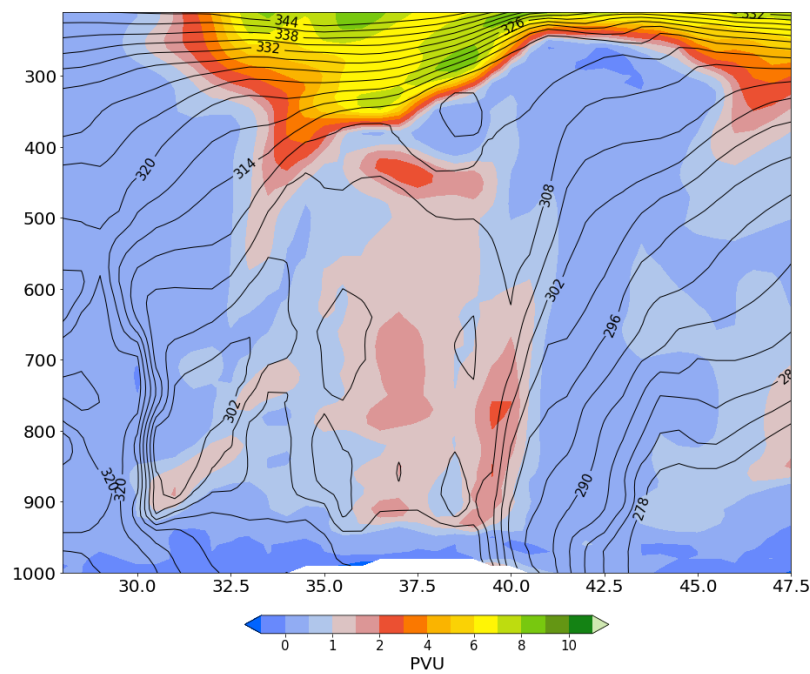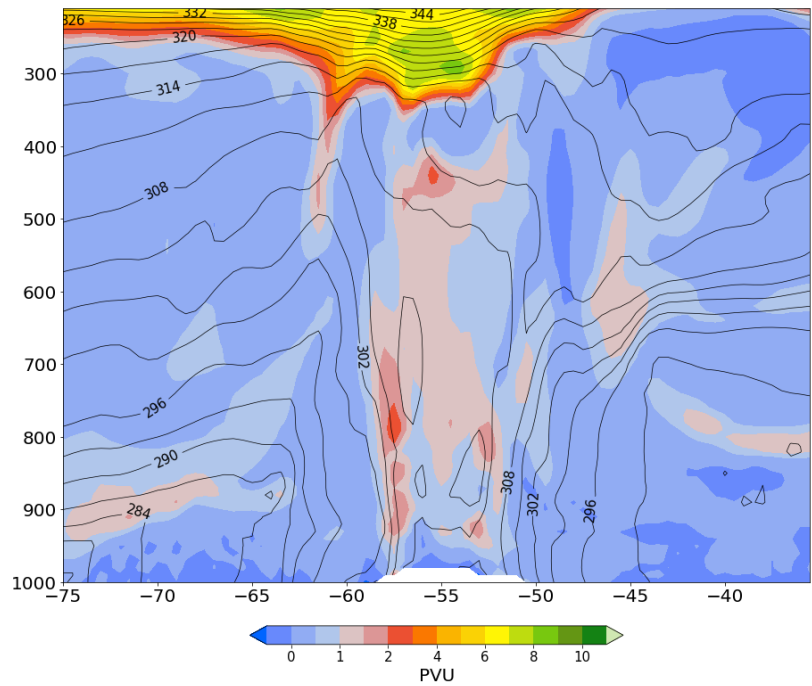

# U.K. Great October storm

Horizontal maps from 00 UTC on 13 October – 18 UTC on 18 October 1987

Vertical cross sections from 12 UTC on 15 October – 06 UTC on 16 October 1987

meridional cross sections (S to N)

| date        | cyclone center | cross sections |              | minimum MSLP |
|-------------|----------------|----------------|--------------|--------------|
|             |                | from           | to           |              |
| 19871015_12 | 14°W / 44°N    | 14°W / 34°N    | 14°W / 54°N  | 970 hPa      |
| 19871015_18 | 9°W / 46°N     | 9°W / 36°N     | 9°W / 56°N   | 962 hPa      |
| 19871016_00 | 4°W / 49°N     | 4°W / 39°N     | 4°W / 59°N   | 958 hPa      |
| 19871016_06 | 0.5°W / 53°N   | 0.5°W / 43°N   | 0.5°W / 63°N | 958 hPa      |

zonal cross sections (W to E)

| date        | cyclone center | cross sections |               | minimum MSLP |
|-------------|----------------|----------------|---------------|--------------|
|             |                | from           | to            |              |
| 19871015_12 | 14°W / 44°N    | 34°W / 44°N    | 6°E / 44°N    | 970 hPa      |
| 19871015_18 | 9°W / 46°N     | 29°W / 46°N    | 11°E / 46°N   | 962 hPa      |
| 19871016_00 | 4°W / 49°N     | 24°W / 49°N    | 16°E / 49°N   | 958 hPa      |
| 19871016_06 | 0.5°W / 53°N   | 20.5°W / 53°N  | 19.5°E / 53°N | 958 hPa      |

00 UTC on 13 October 1987

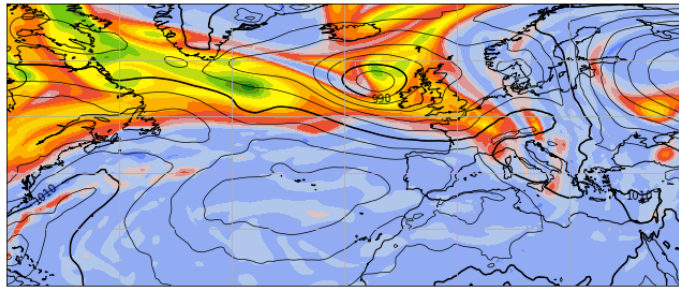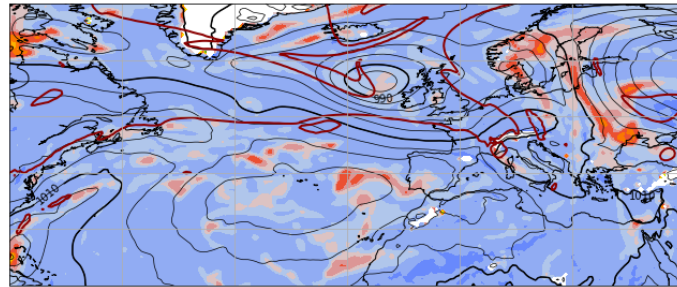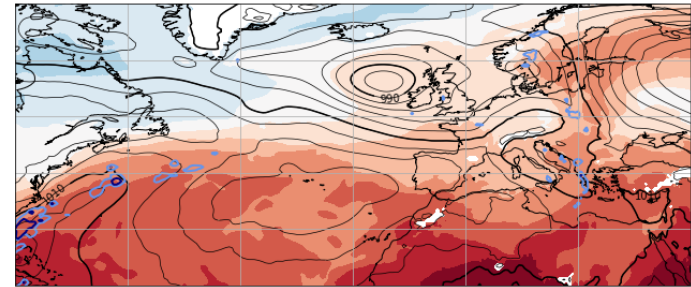

60°N  
50°N  
40°N  
30°N

06 UTC on 13 October 1987

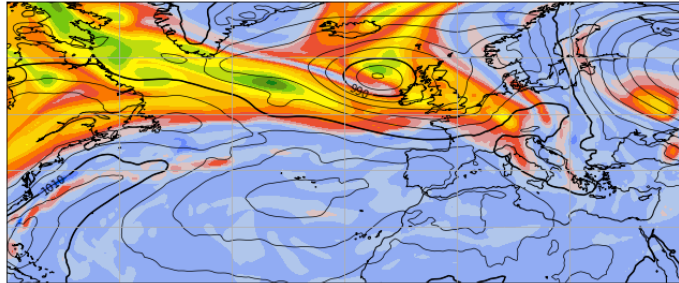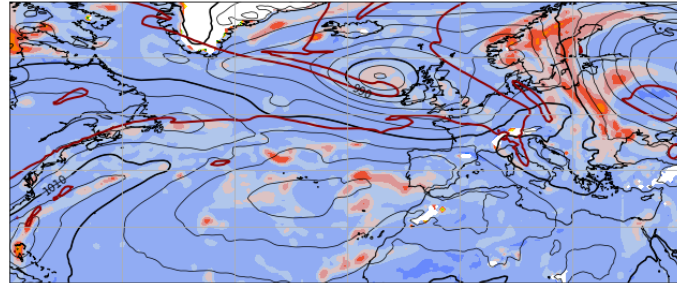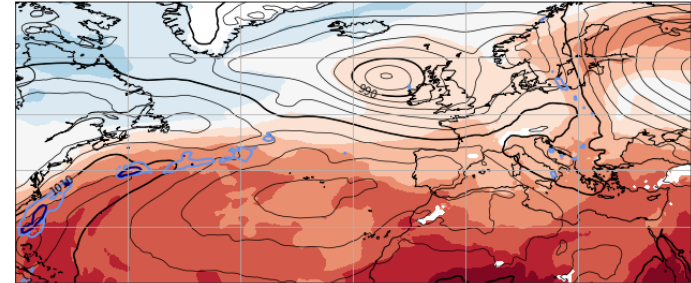

60°N  
50°N  
40°N  
30°N

12 UTC on 13 October 1987

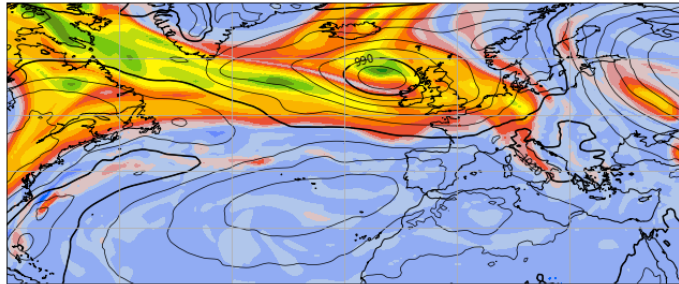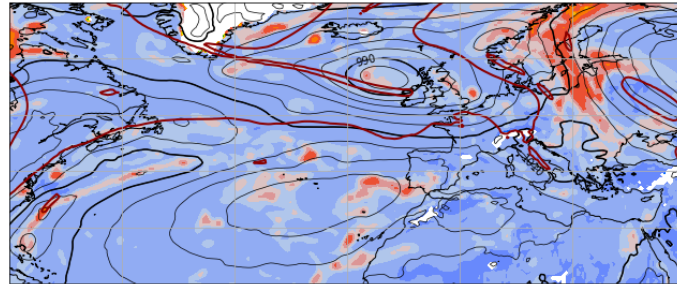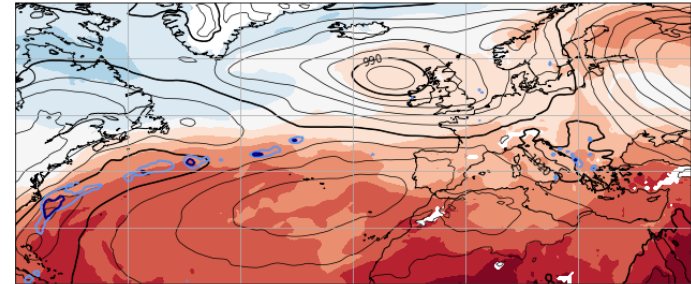

60°N  
50°N  
40°N  
30°N

18 UTC on 13 October 1987

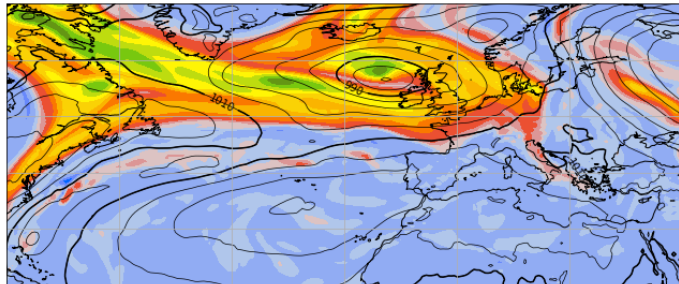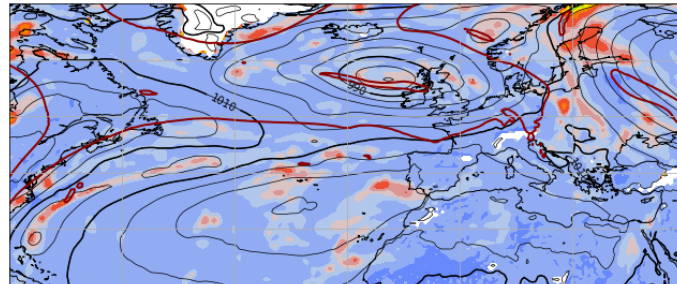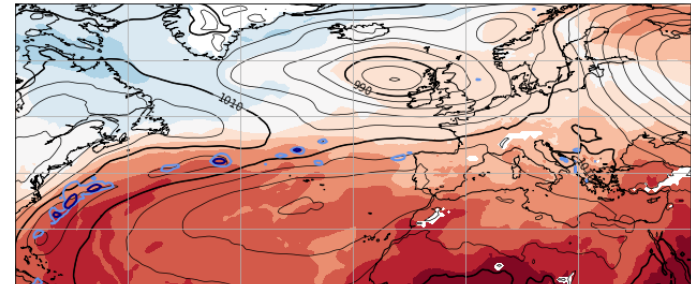

60°N  
50°N  
40°N  
30°N

60°W 40°W 20°W 0° 20°E

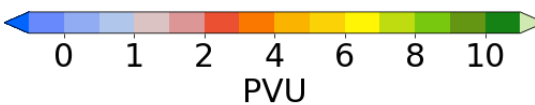

60°W 40°W 20°W 0° 20°E

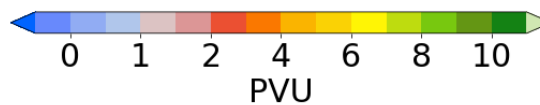

60°W 40°W 20°W 0° 20°E

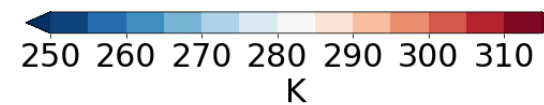

00 UTC on 14 October 1987

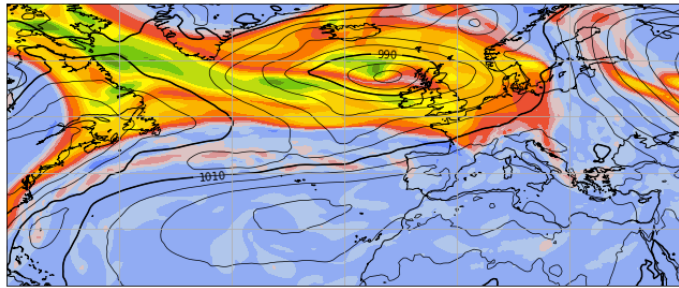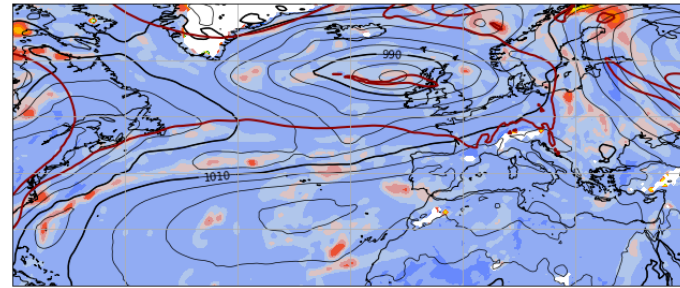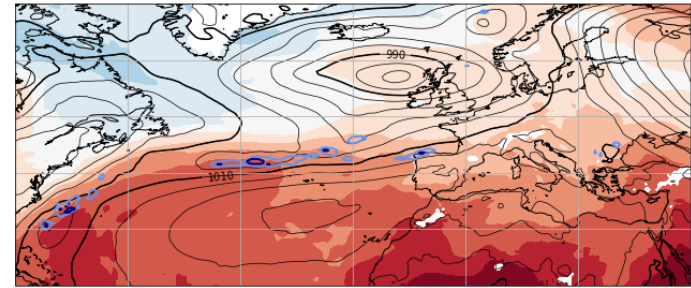

60°N  
50°N  
40°N  
30°N

06 UTC on 14 October 1987

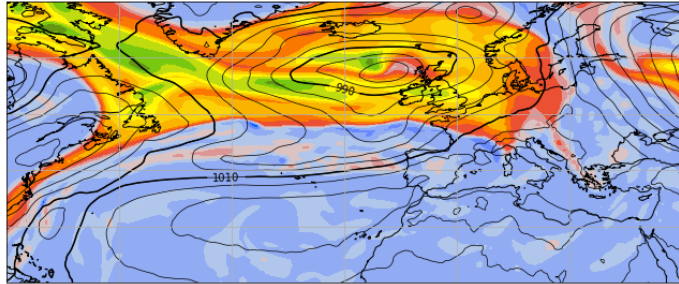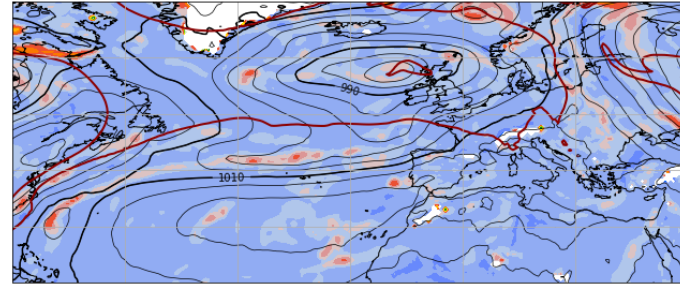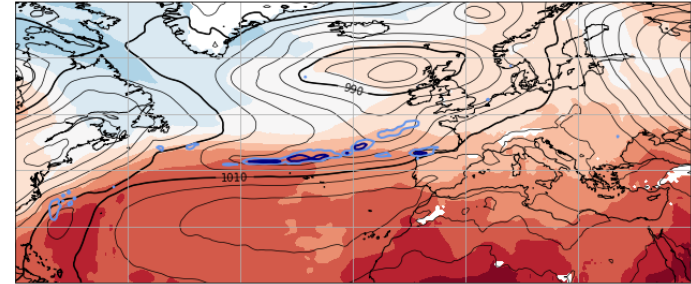

60°N  
50°N  
40°N  
30°N

12 UTC on 14 October 1987

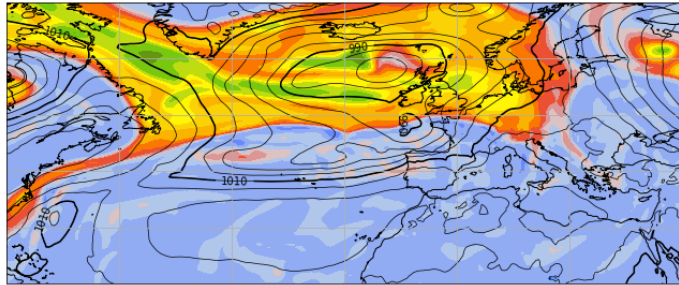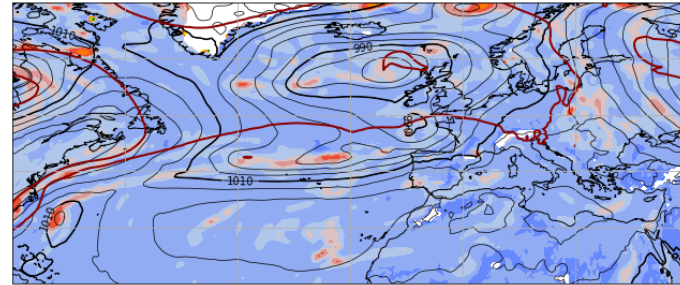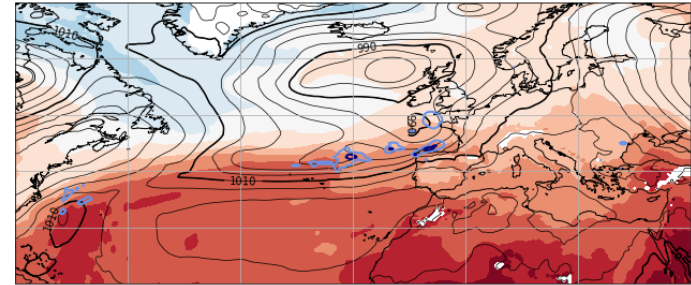

60°N  
50°N  
40°N  
30°N

18 UTC on 14 October 1987

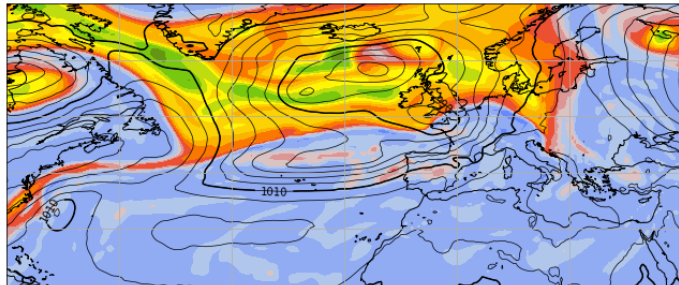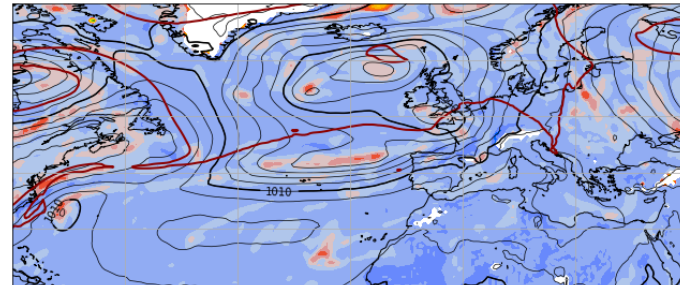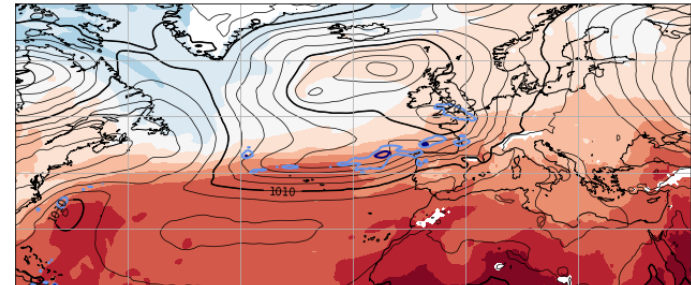

60°N  
50°N  
40°N  
30°N

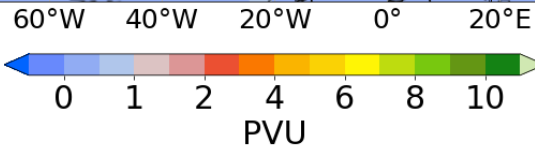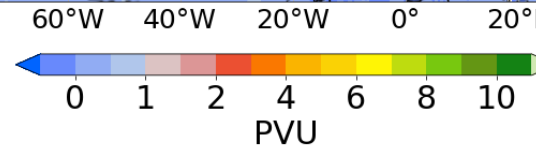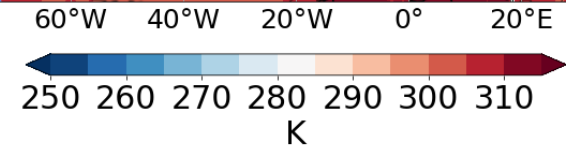

00 UTC on 15 October 1987

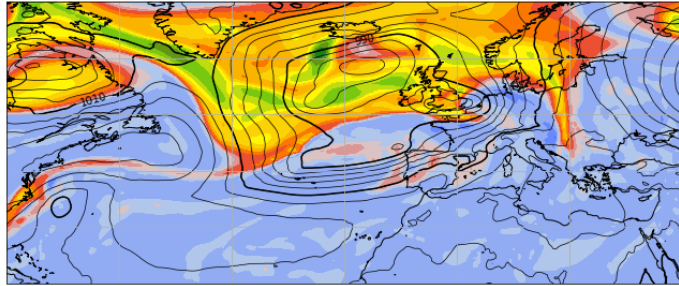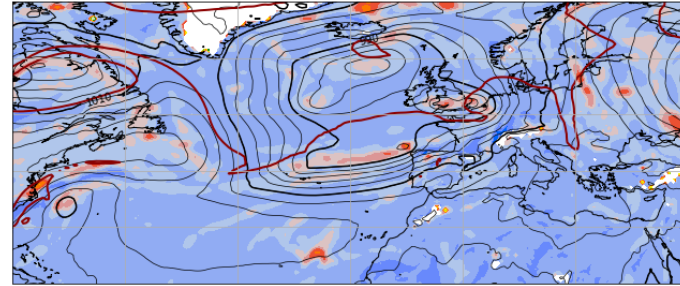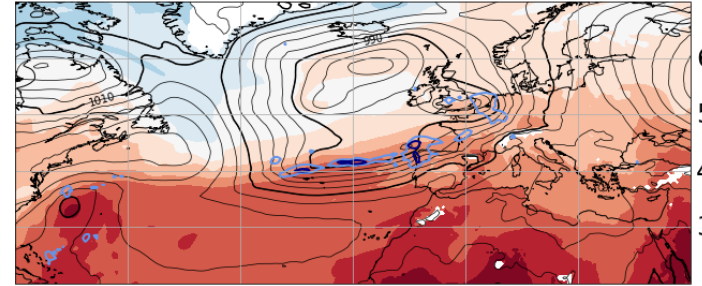

60°N  
50°N  
40°N  
30°N

06 UTC on 15 October 1987

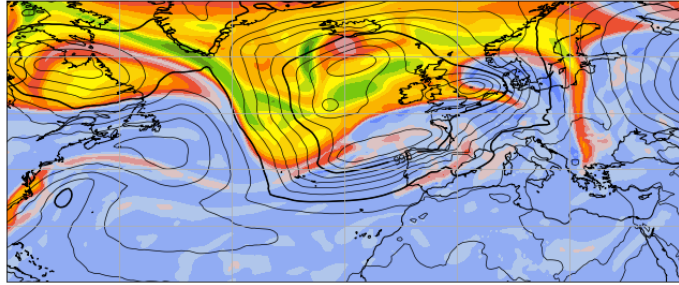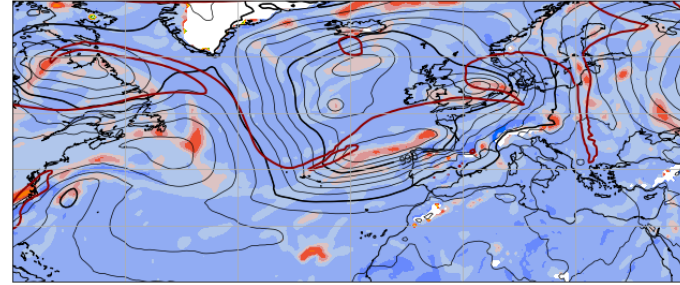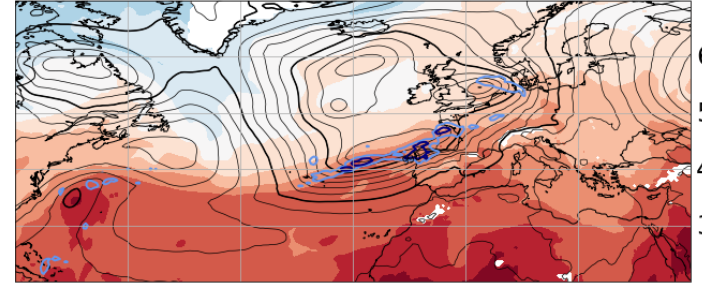

60°N  
50°N  
40°N  
30°N

12 UTC on 15 October 1987

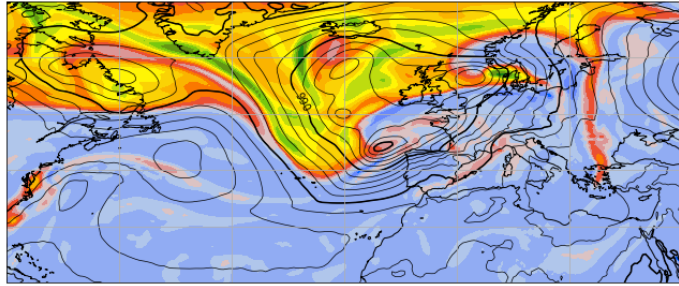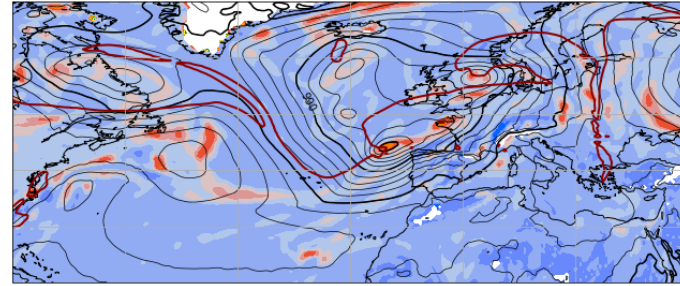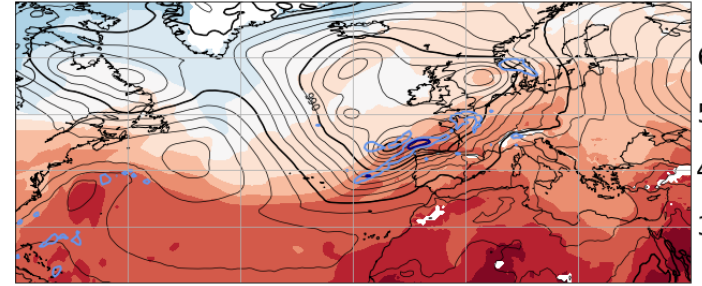

60°N  
50°N  
40°N  
30°N

18 UTC on 15 October 1987

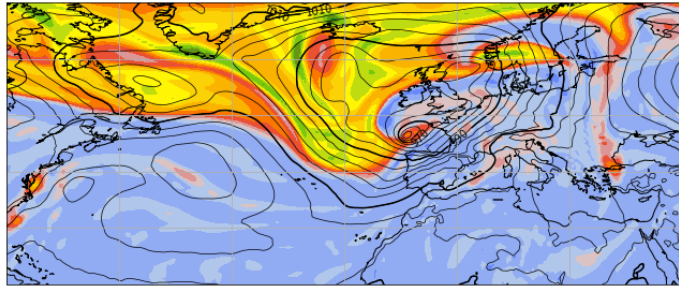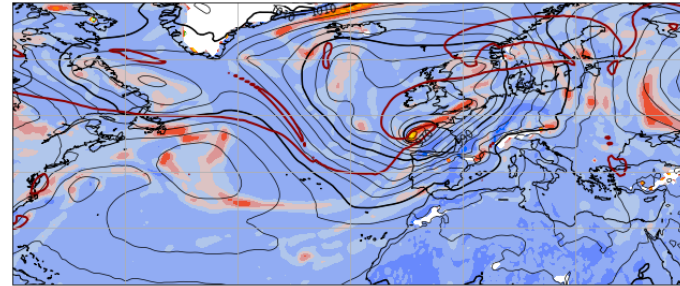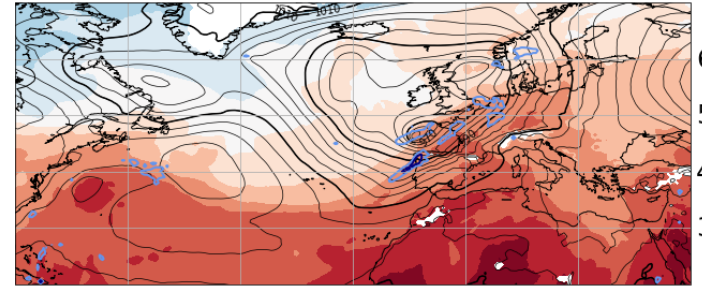

60°N  
50°N  
40°N  
30°N

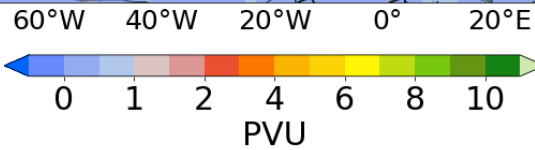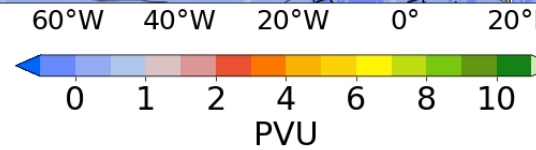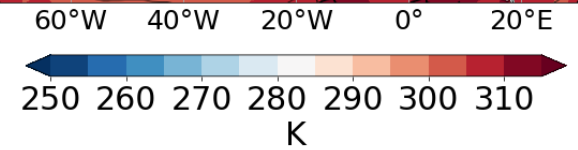



00 UTC on 16 October 1987

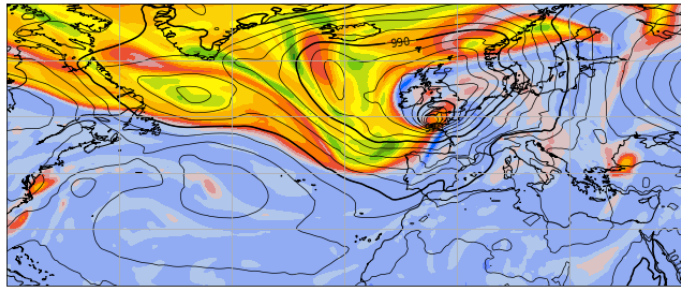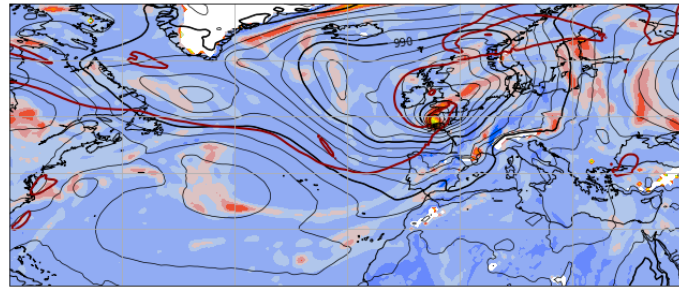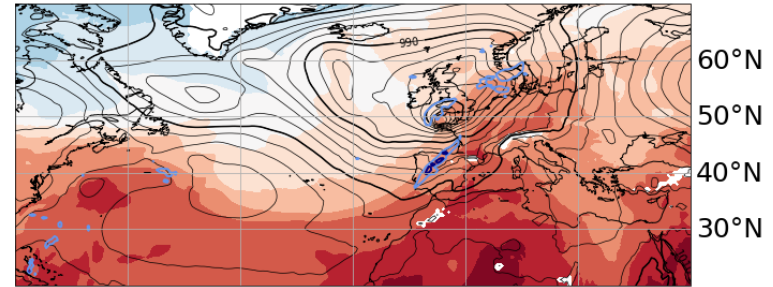

06 UTC on 16 October 1987

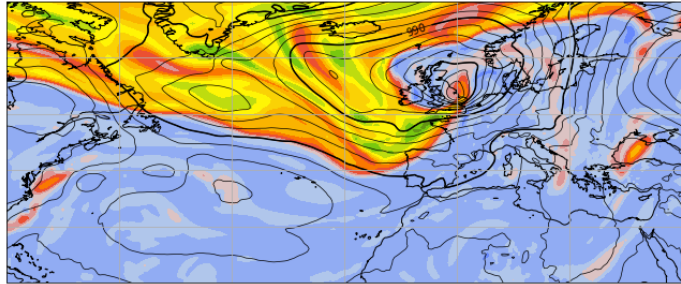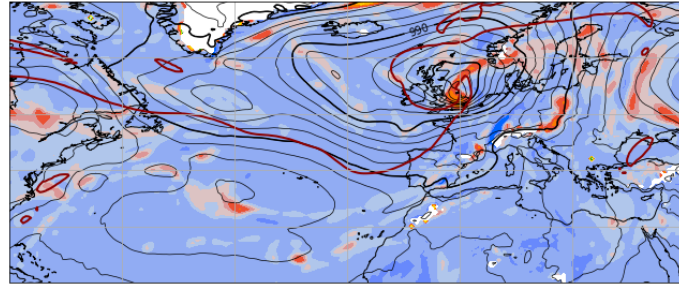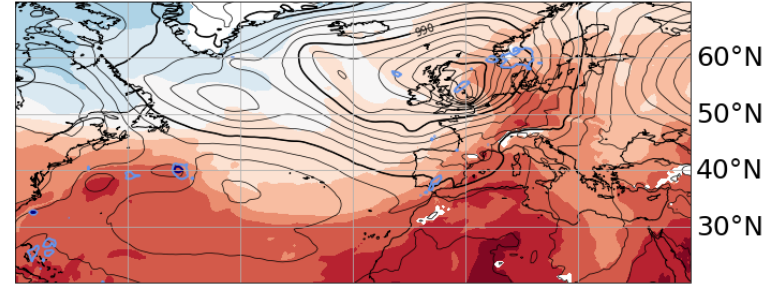

12 UTC on 16 October 1987

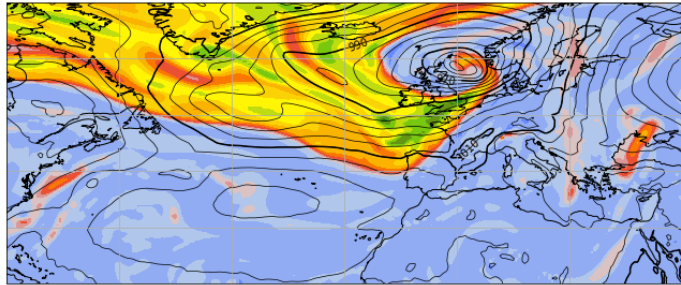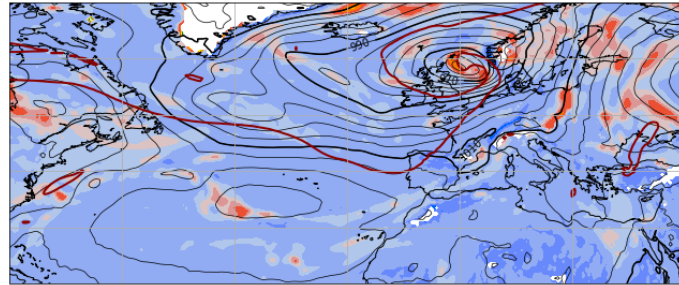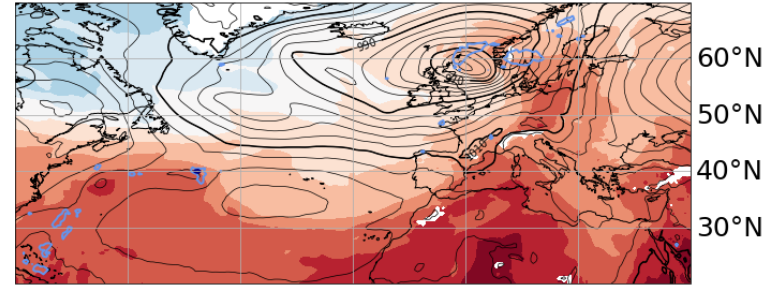

18 UTC on 16 October 1987

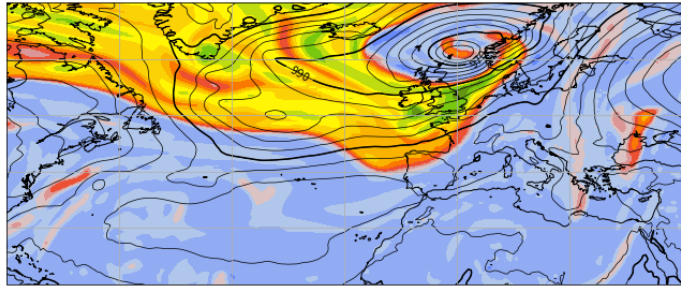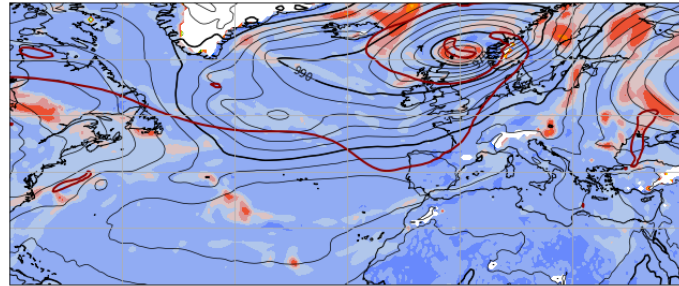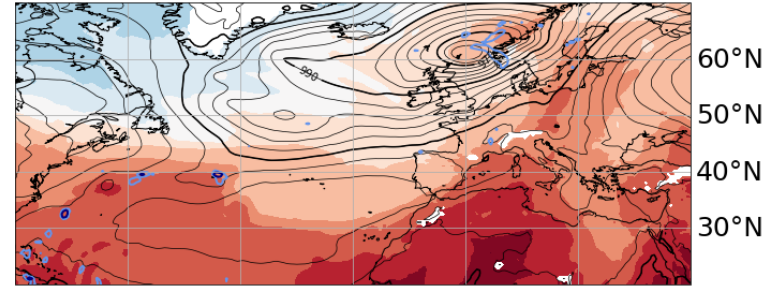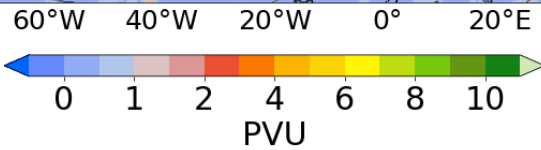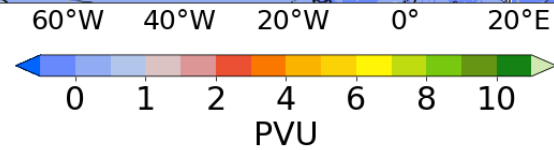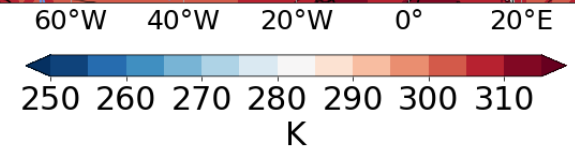

00 UTC on 17 October 1987

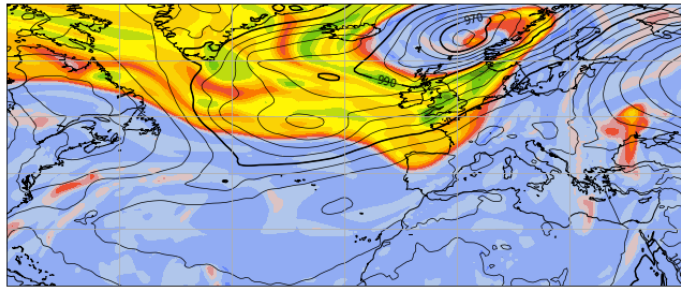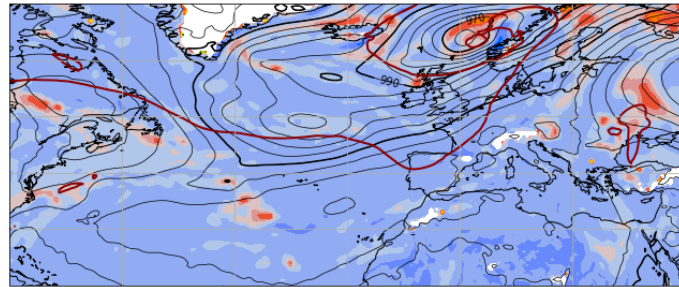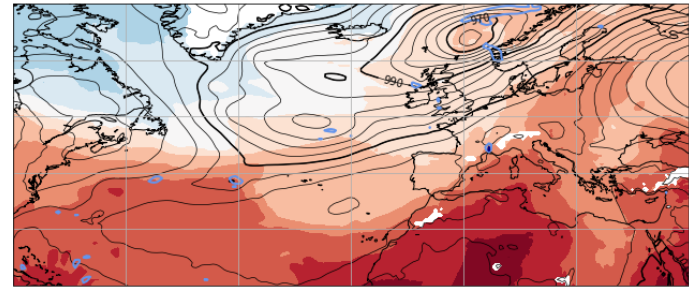

06 UTC on 17 October 1987

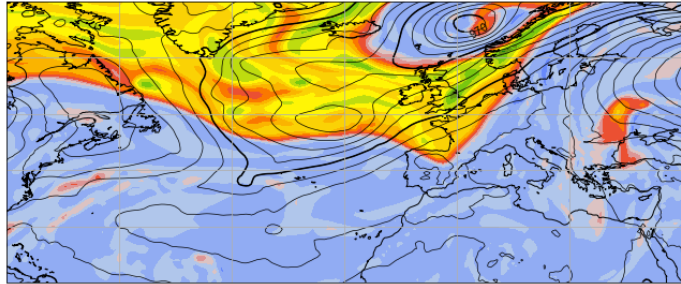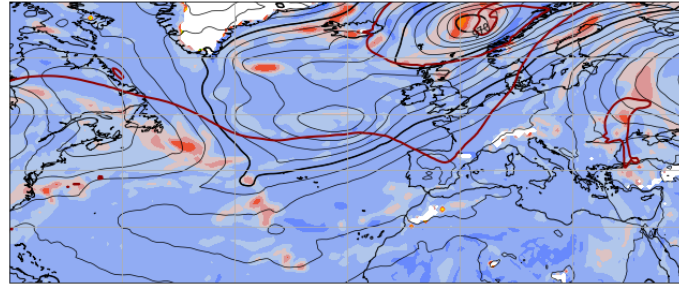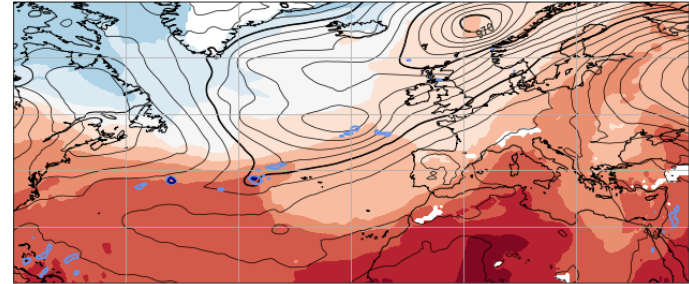

12 UTC on 17 October 1987

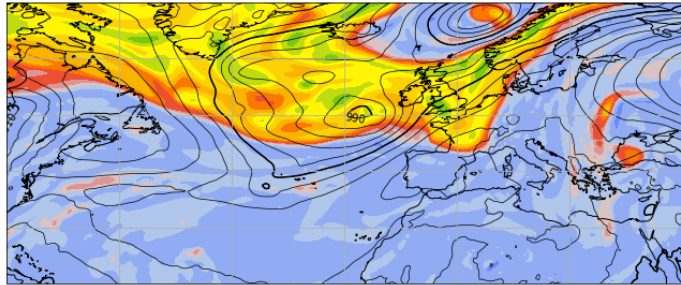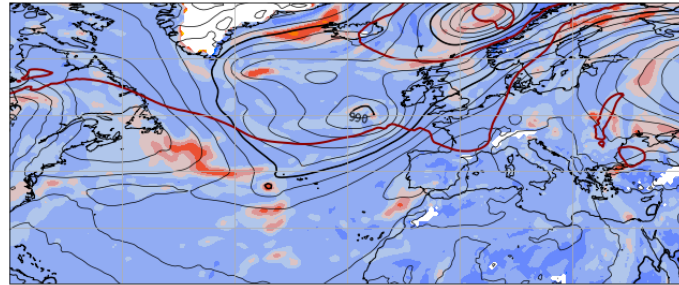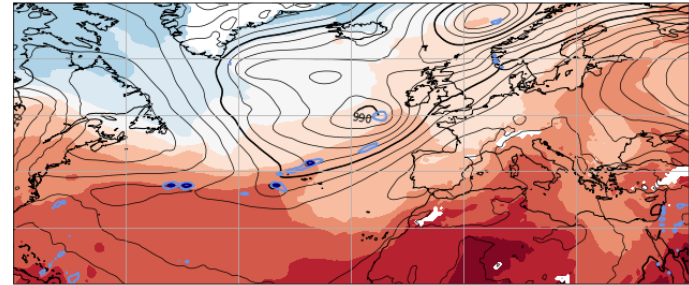

18 UTC on 17 October 1987

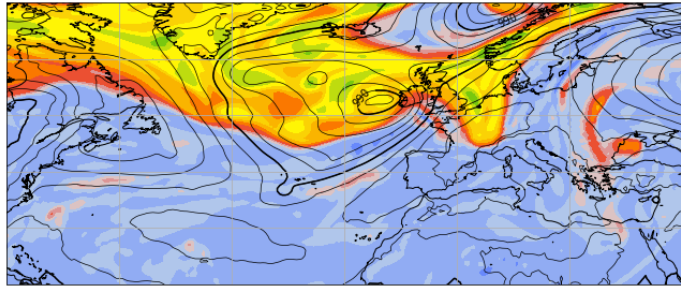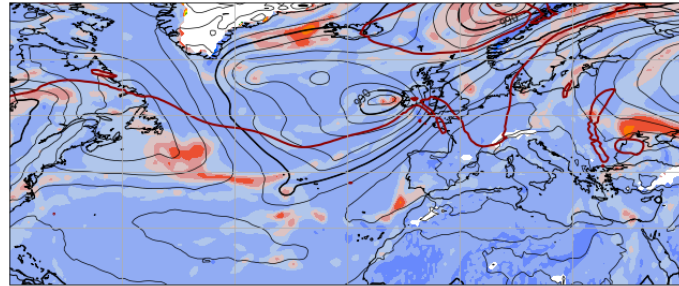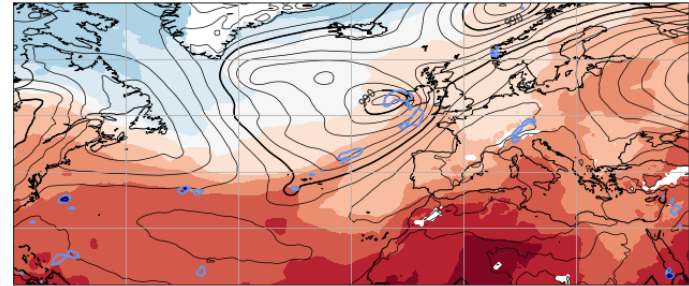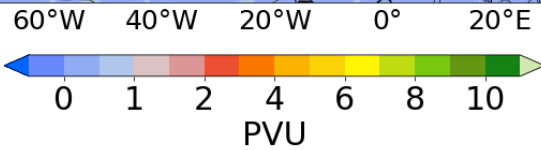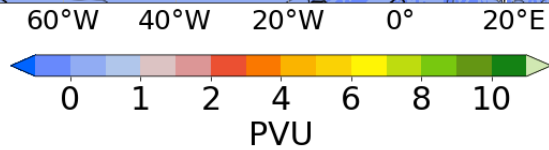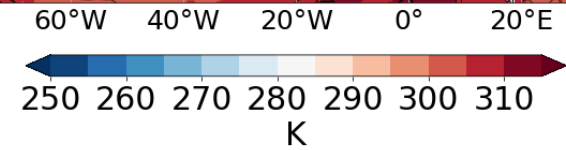

00 UTC on 18 October 1987

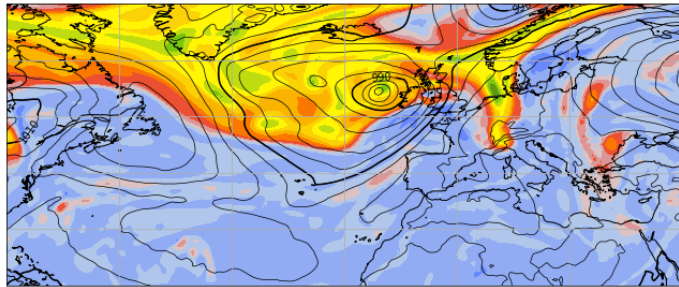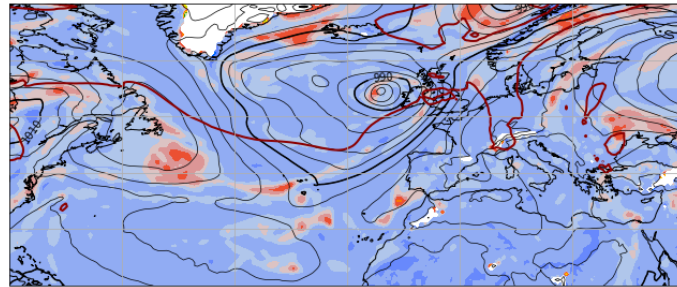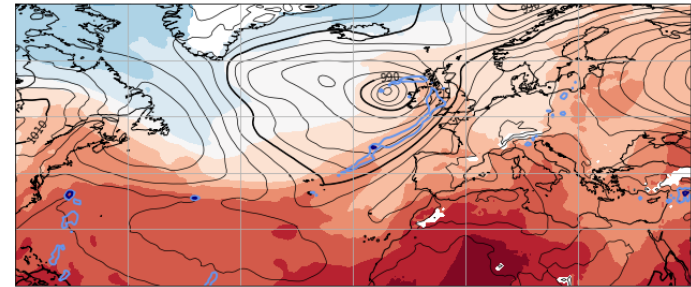

60°N  
50°N  
40°N  
30°N

06 UTC on 18 October 1987

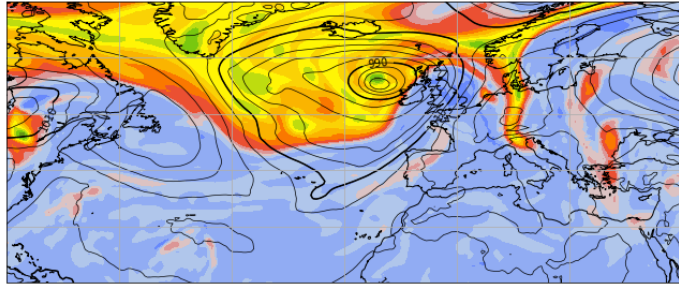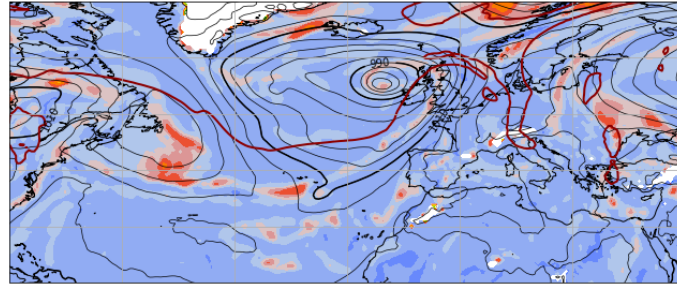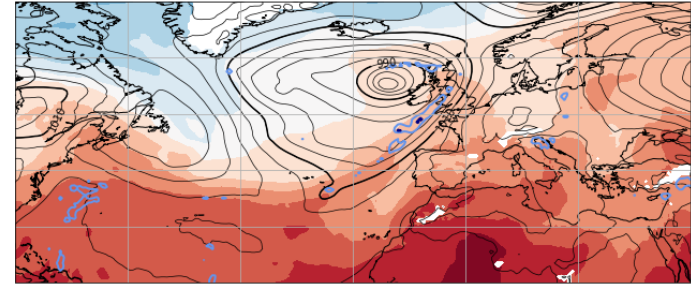

60°N  
50°N  
40°N  
30°N

12 UTC on 18 October 1987

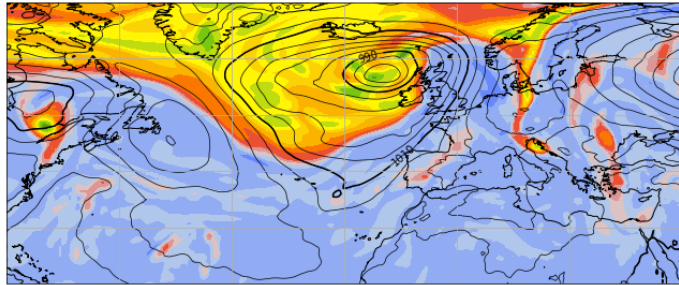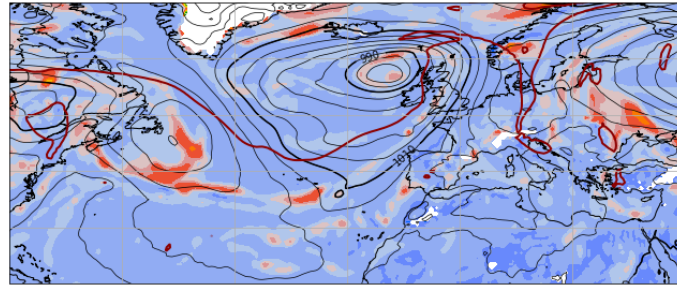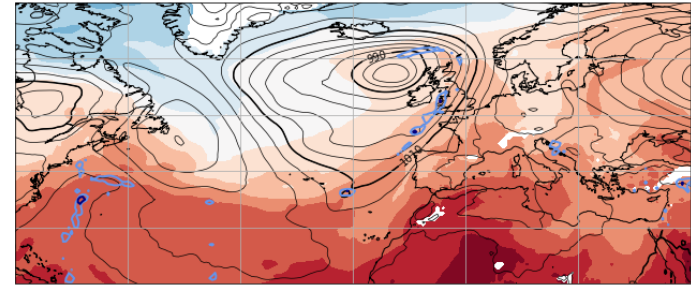

60°N  
50°N  
40°N  
30°N

18 UTC on 18 October 1987

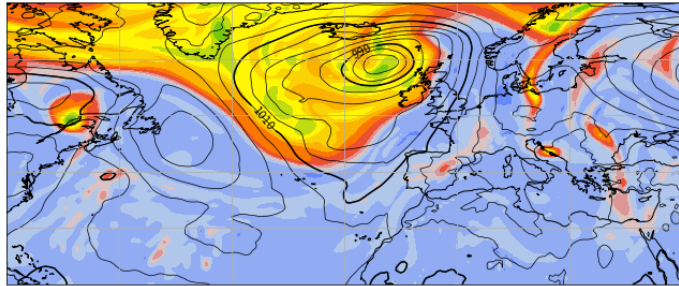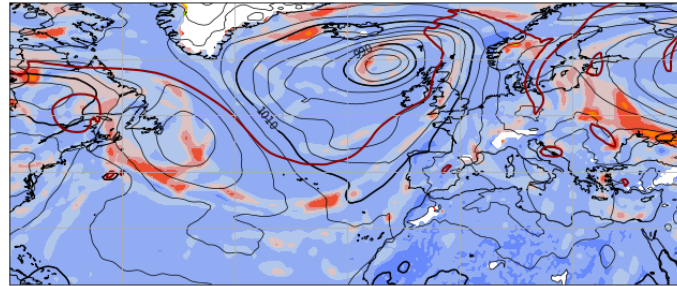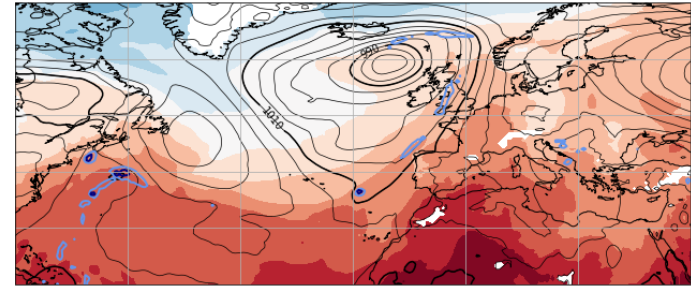

60°N  
50°N  
40°N  
30°N

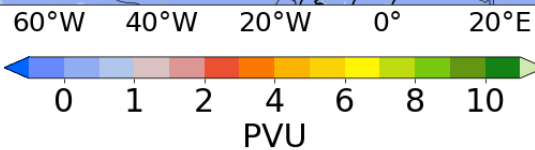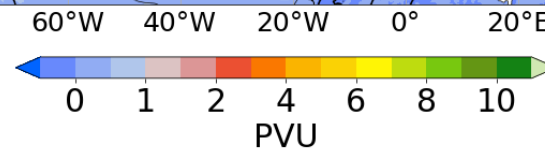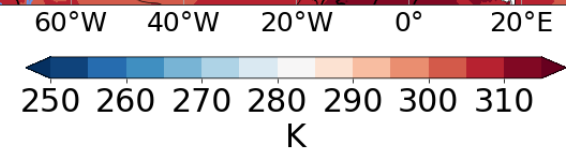

# Great UK October Storm 12 UTC 15 Oct to 06 UTC 16 Oct 1987

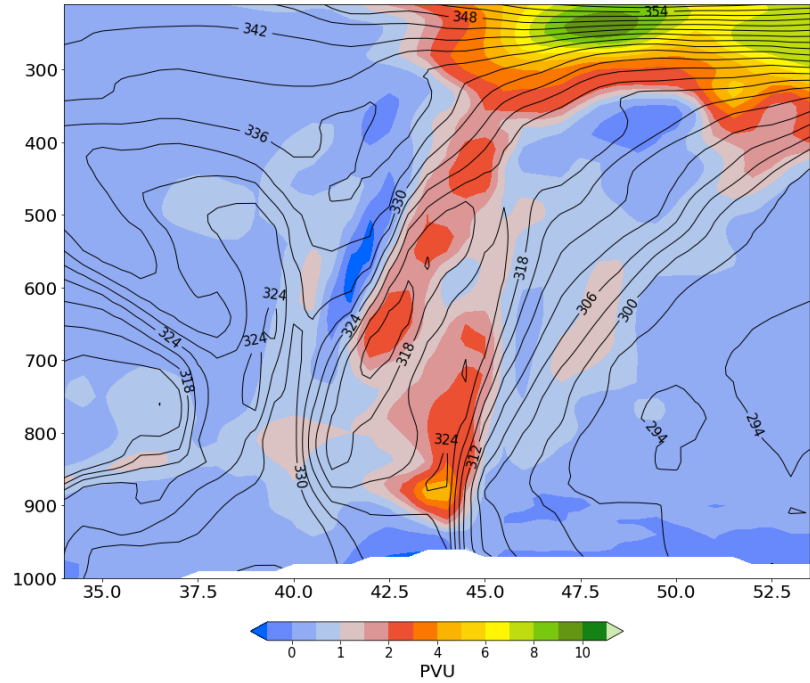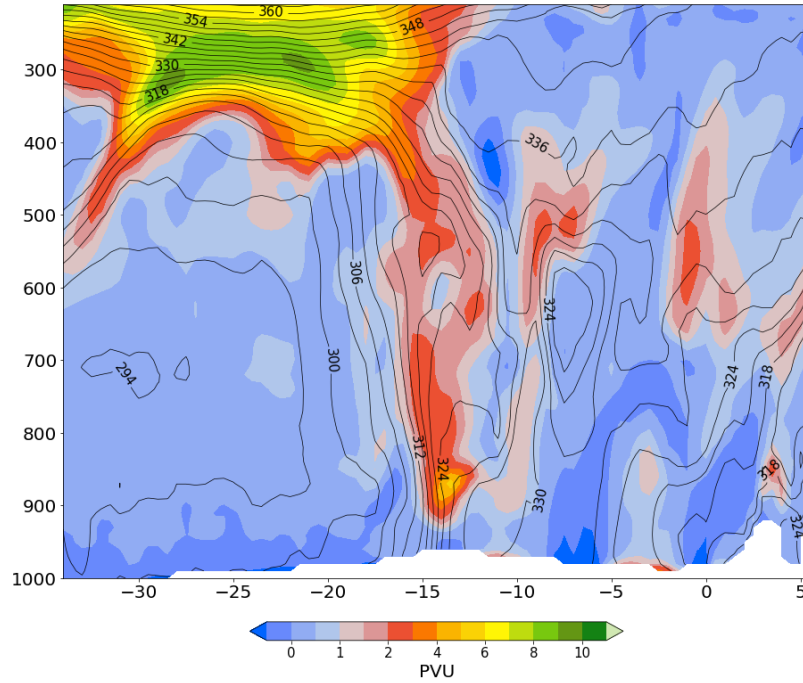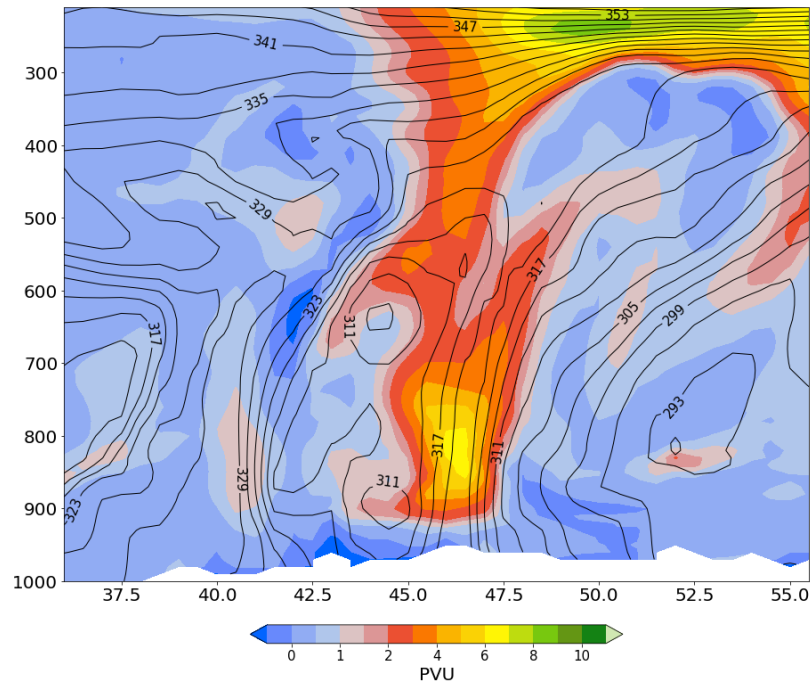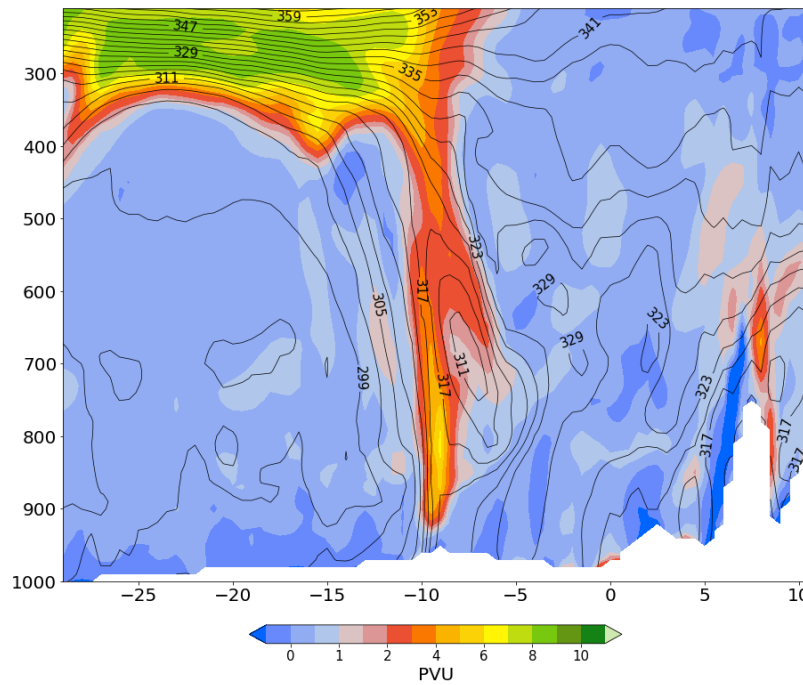

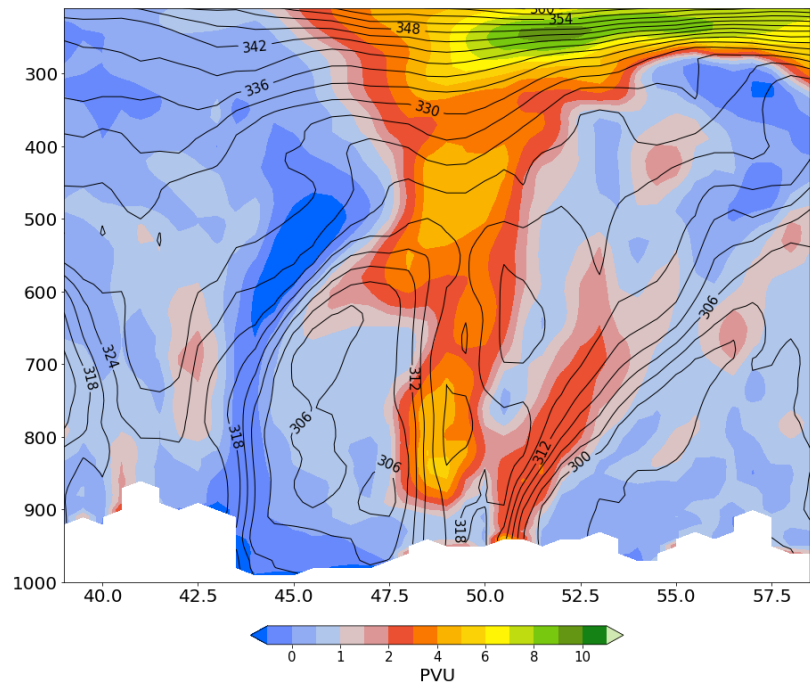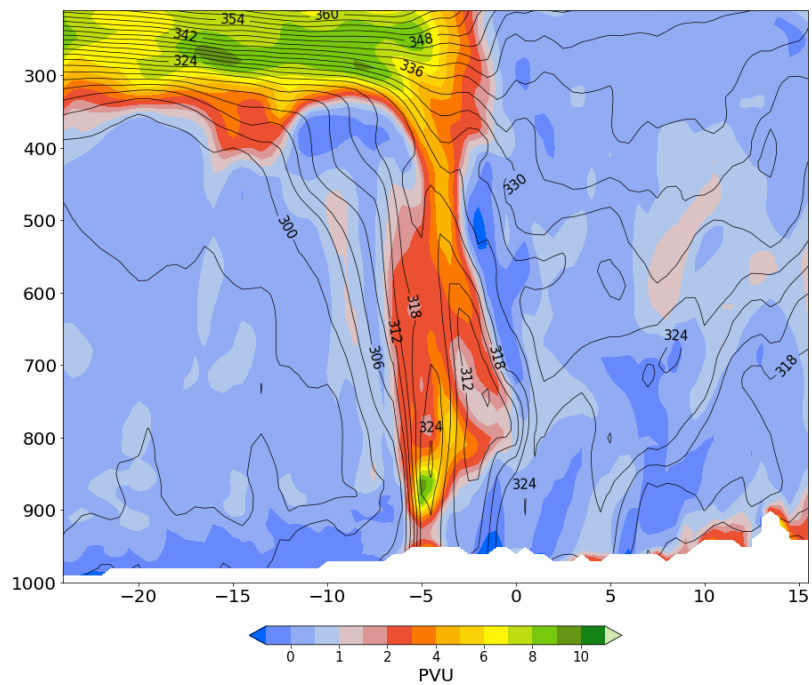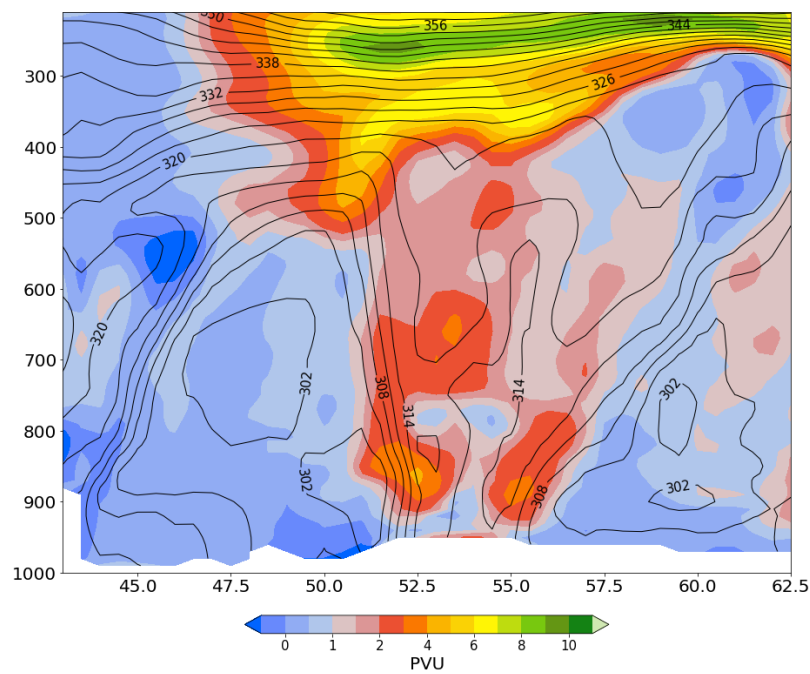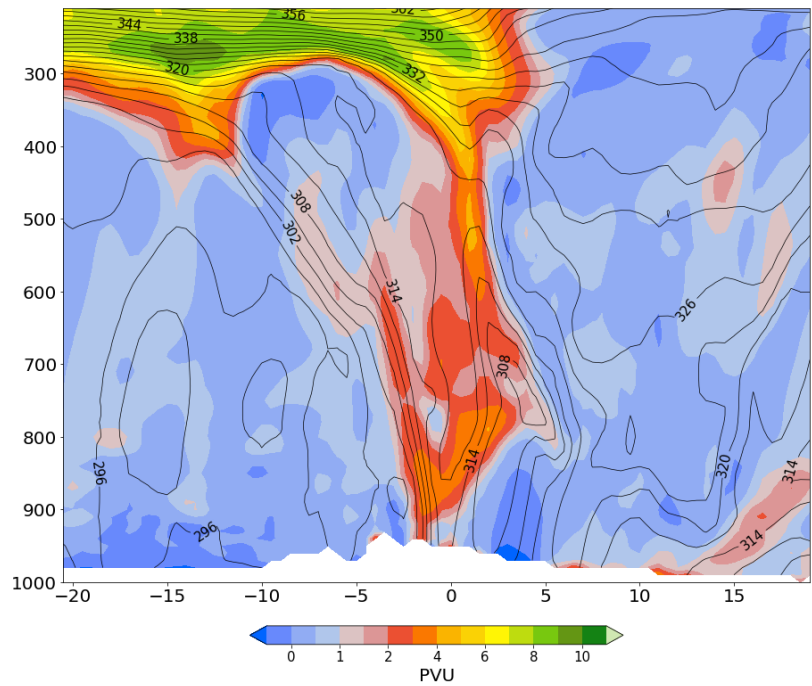

# Lothar

Horizontal maps from 00 UTC on 23 December – 18 UTC on 28 December 1999

Vertical cross sections from 06 UTC on 25 December – 12 UTC on 26 December 1999

meridional cross sections (S to N)

| date        | cyclone center | cross sections |             | minimum MSLP |
|-------------|----------------|----------------|-------------|--------------|
|             |                | from           | to          |              |
| 19991225_06 | 38°W / 44°N    | 38°W / 34°N    | 38°W / 54°N | 998 hPa      |
| 19991225_12 | 29°W / 46°N    | 29°W / 36°N    | 29°W / 56°N | 998 hPa      |
| 19991225_18 | 20°W / 47°N    | 20°W / 37°N    | 20°W / 57°N | 994 hPa      |
| 19991226_00 | 9°W / 48°N     | 9°W / 38°N     | 9°W / 58°N  | 986 hPa      |
| 19991226_06 | 2°E / 49°N     | 2°E / 39°N     | 2°E / 59°N  | 978 hPa      |
| 19991226_12 | 10°E / 50°N    | 10°E / 40°N    | 10°E / 60°N | 978 hPa      |

zonal cross sections (W to E)

| date        | cyclone center | cross sections |             | minimum MSLP |
|-------------|----------------|----------------|-------------|--------------|
|             |                | from           | to          |              |
| 19991225_06 | 38°W / 44°N    | 58°W / 44°N    | 18°W / 44°N | 998 hPa      |
| 19991225_12 | 29°W / 46°N    | 49°W / 46°N    | 9°W / 46°N  | 998 hPa      |
| 19991225_18 | 20°W / 47°N    | 40°W / 47°N    | 0°E / 47°N  | 994 hPa      |
| 19991226_00 | 9°W / 48°N     | 29°W / 48°N    | 11°E / 48°N | 986 hPa      |
| 19991226_06 | 2°E / 49°N     | 18°W / 49°N    | 22°E / 49°N | 978 hPa      |
| 19991226_12 | 10°E / 50°N    | 10°W / 50°N    | 30°E / 50°N | 978 hPa      |

00 UTC on 23 December 1999

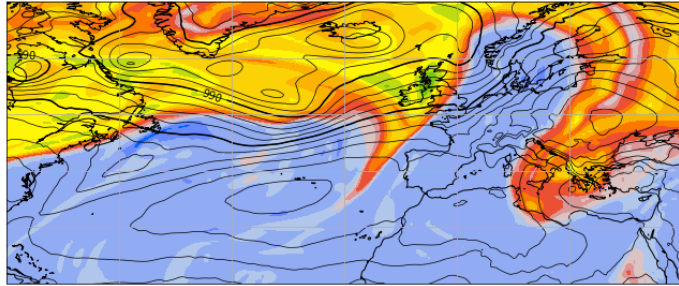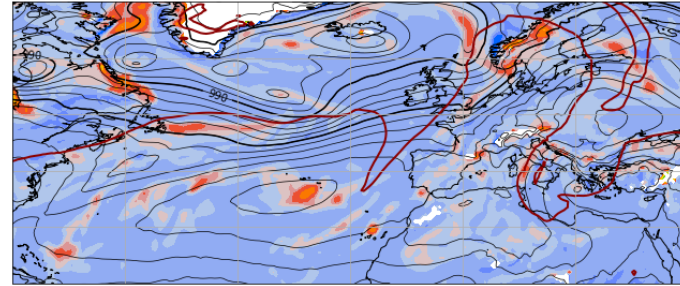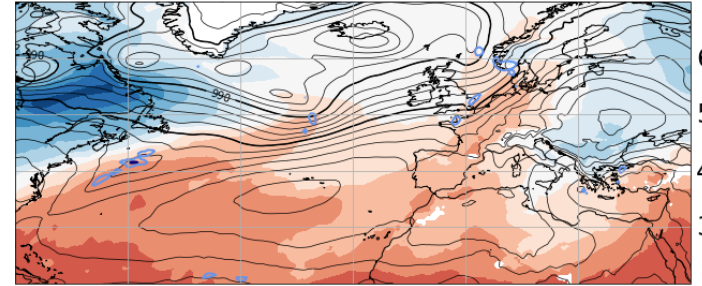

60°N  
50°N  
40°N  
30°N

06 UTC on 23 December 1999

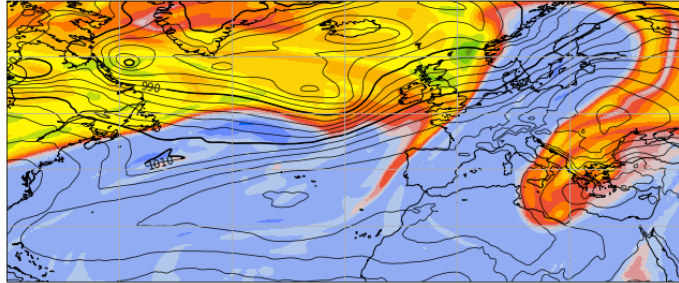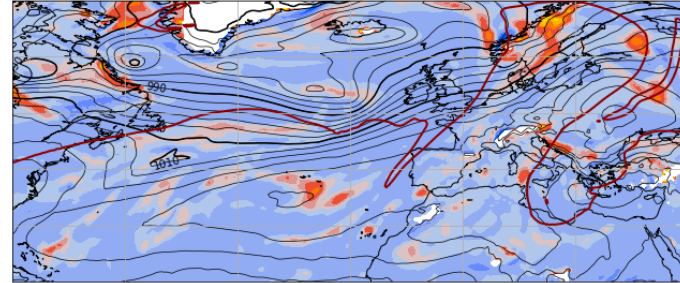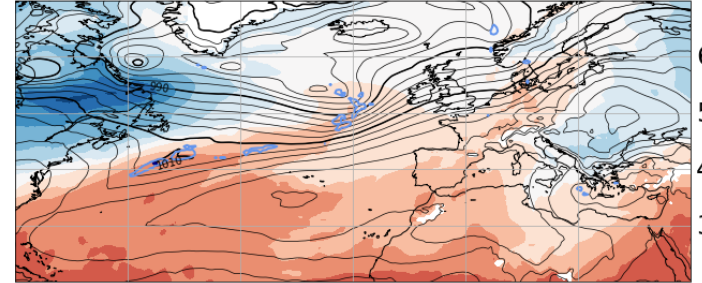

60°N  
50°N  
40°N  
30°N

12 UTC on 23 December 1999

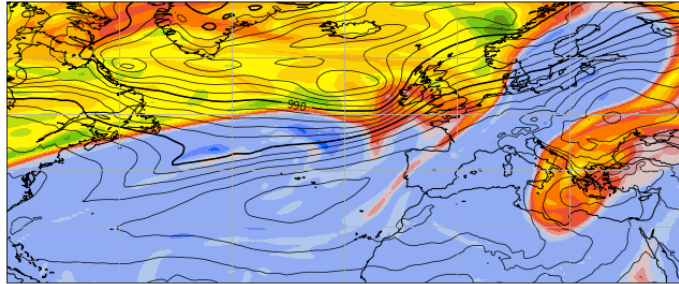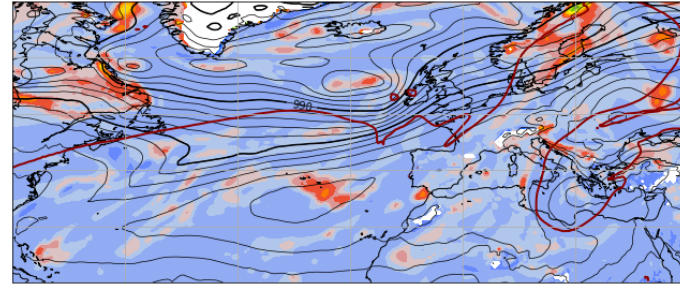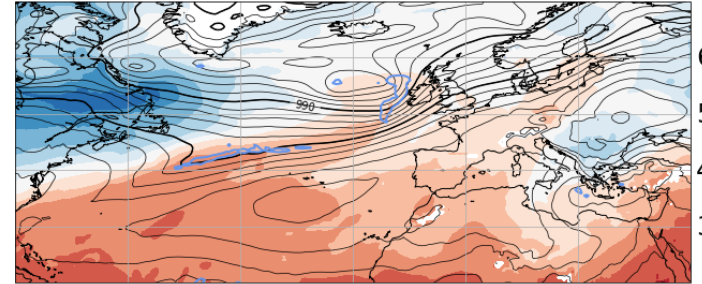

60°N  
50°N  
40°N  
30°N

18 UTC on 23 December 1999

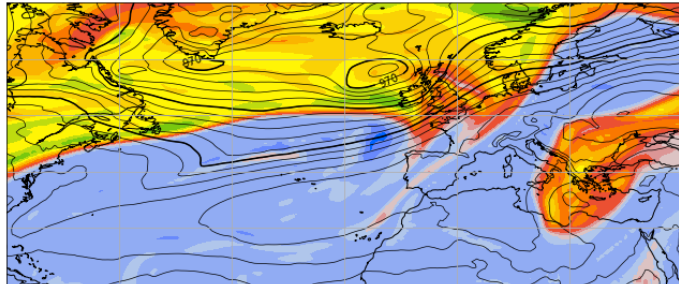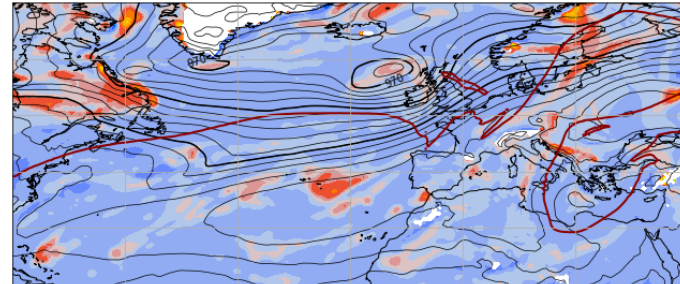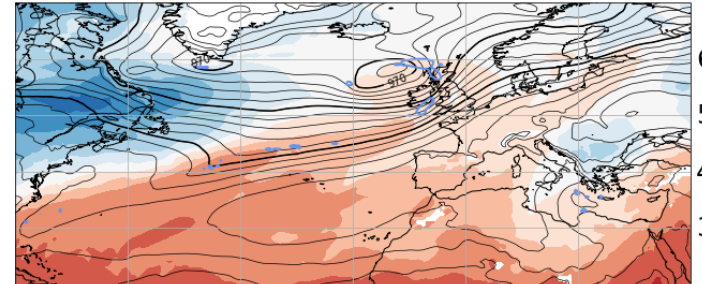

60°N  
50°N  
40°N  
30°N

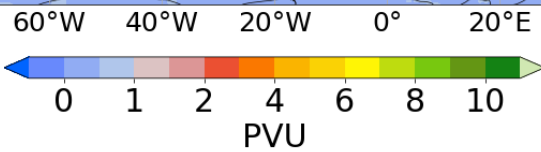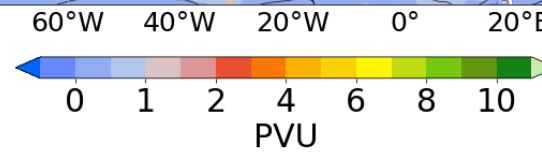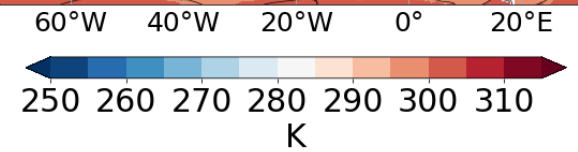

00 UTC on 24 December 1999

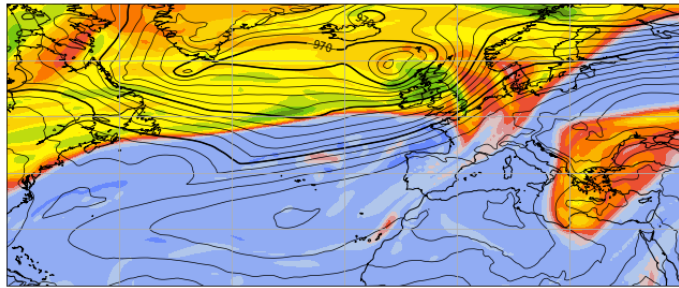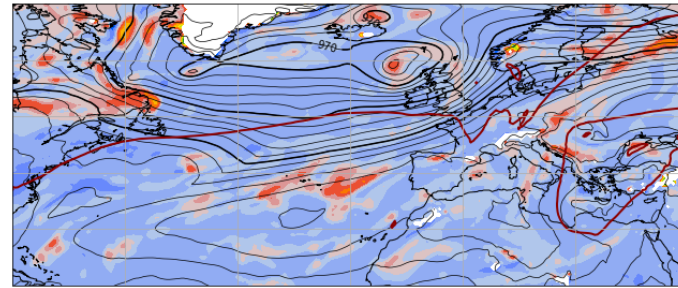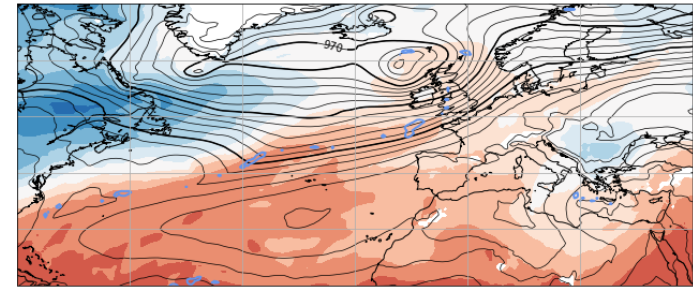

60°N  
50°N  
40°N  
30°N

06 UTC on 24 December 1999

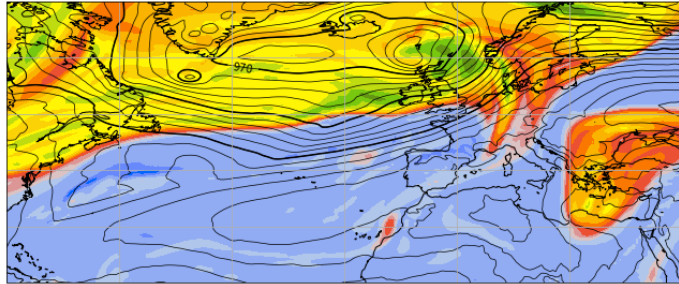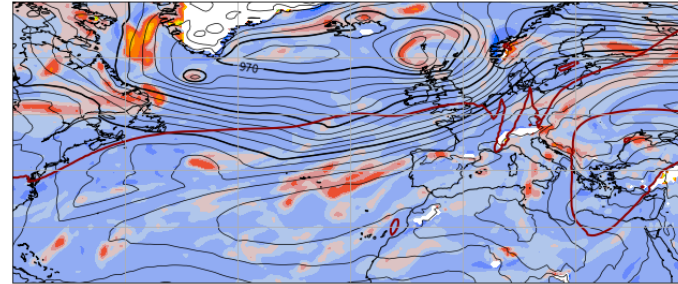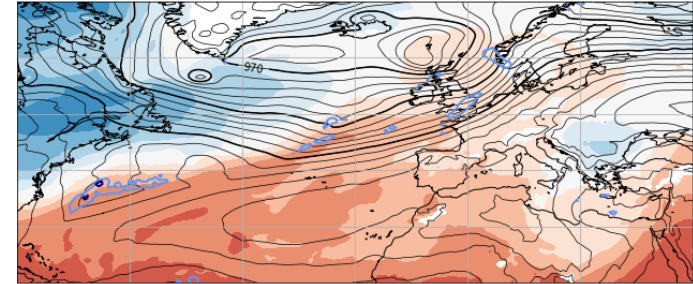

60°N  
50°N  
40°N  
30°N

12 UTC on 24 December 1999

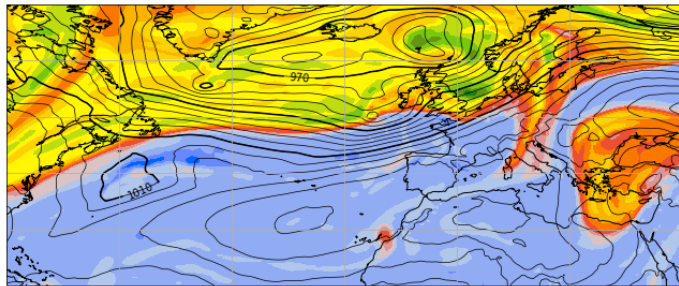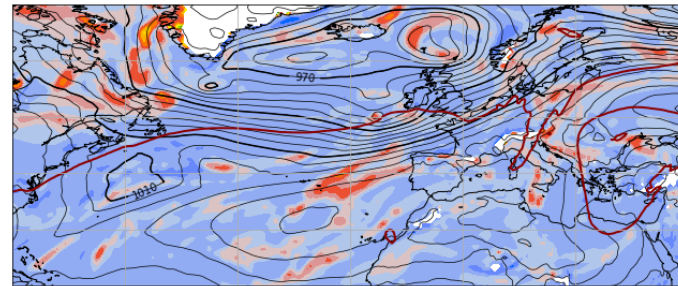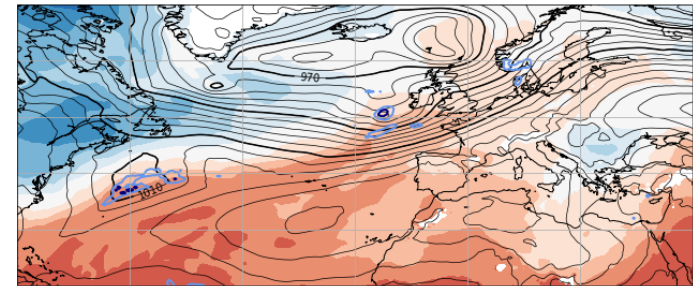

60°N  
50°N  
40°N  
30°N

18 UTC on 24 December 1999

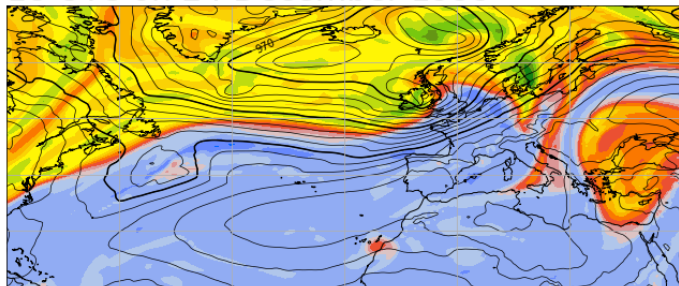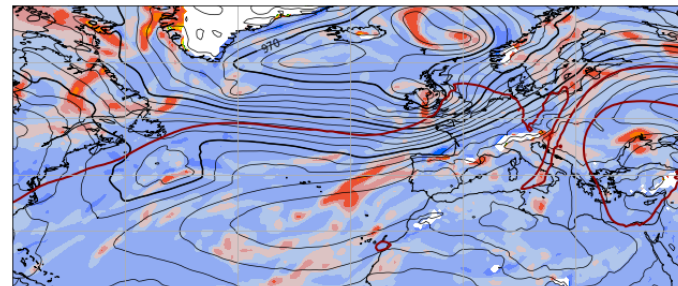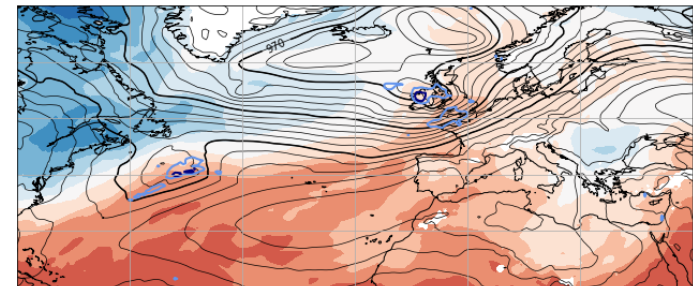

60°N  
50°N  
40°N  
30°N

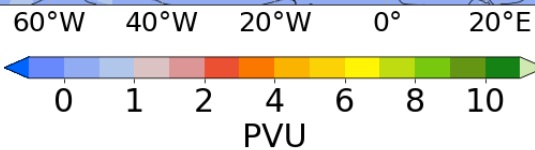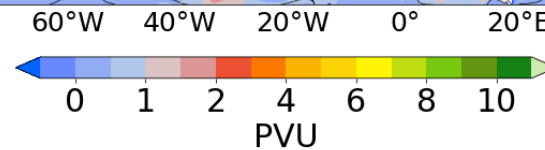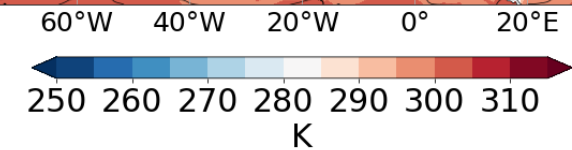



00 UTC on 25 December 1999

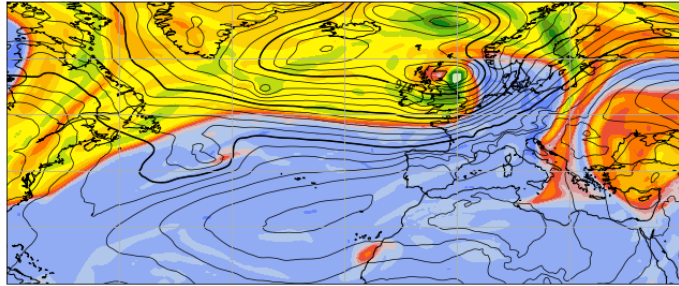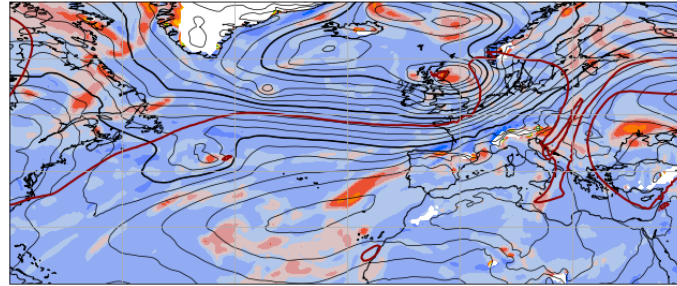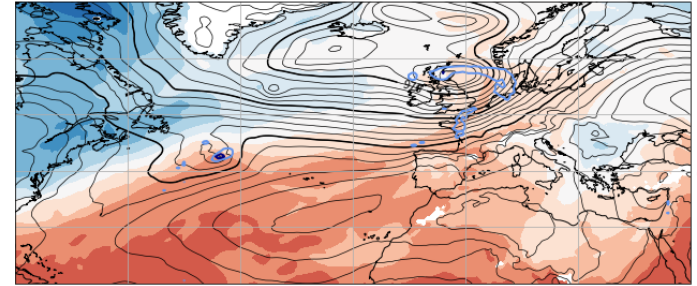

60°N  
50°N  
40°N  
30°N

06 UTC on 25 December 1999

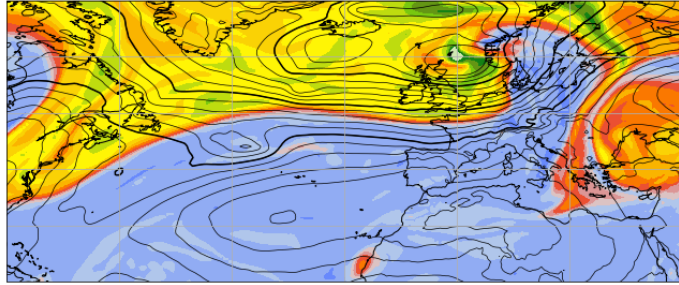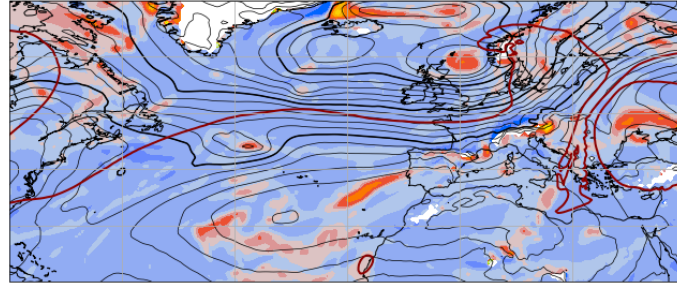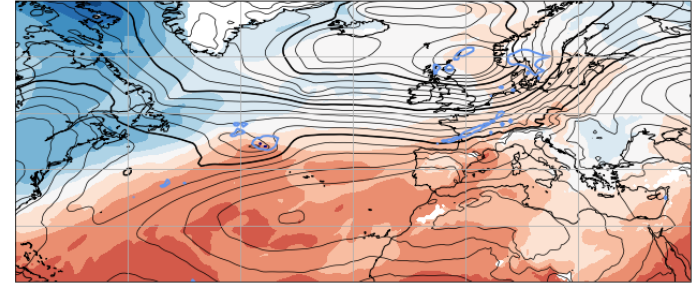

60°N  
50°N  
40°N  
30°N

12 UTC on 25 December 1999

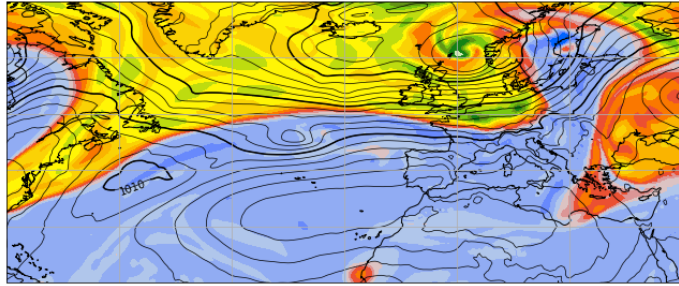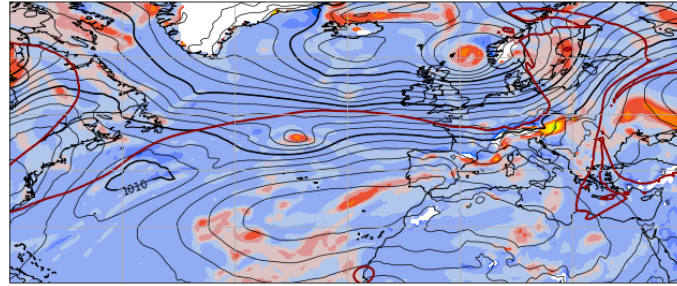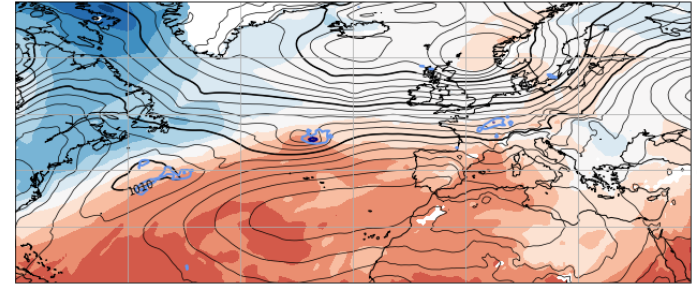

60°N  
50°N  
40°N  
30°N

18 UTC on 25 December 1999

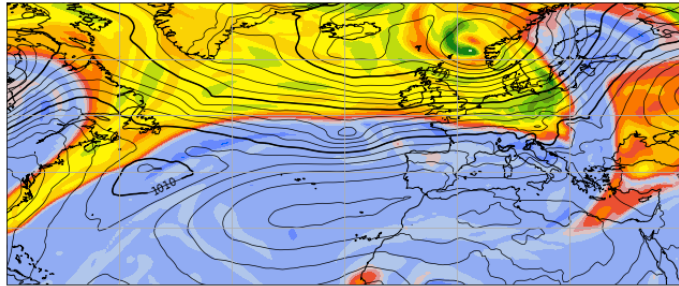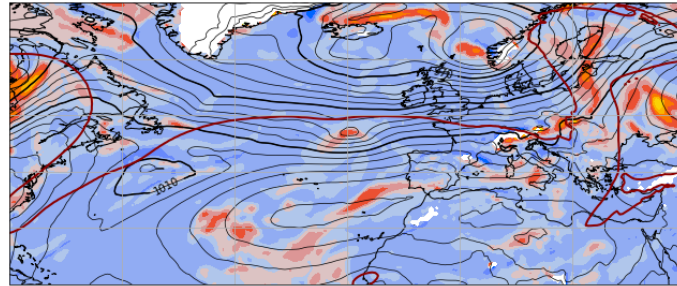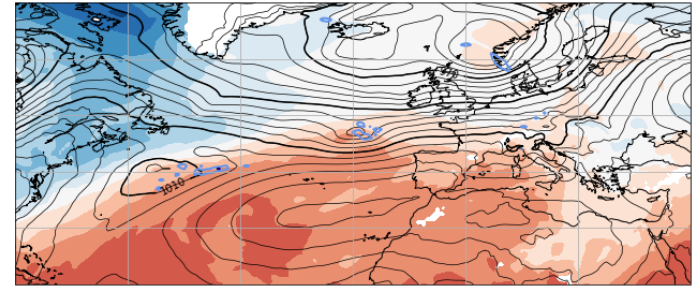

60°N  
50°N  
40°N  
30°N

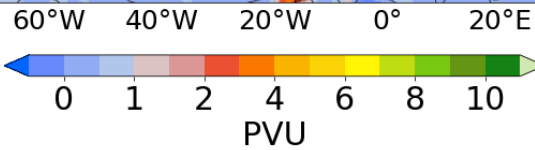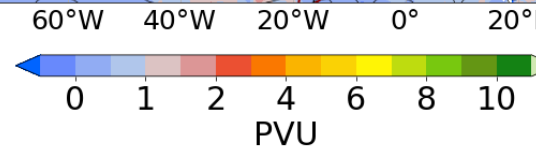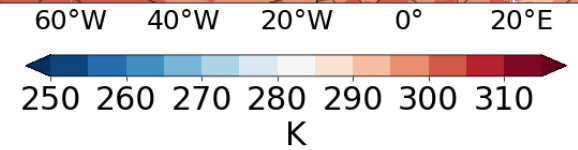

00 UTC on 26 December 1999

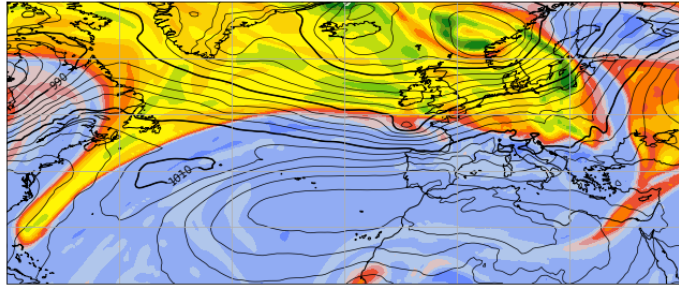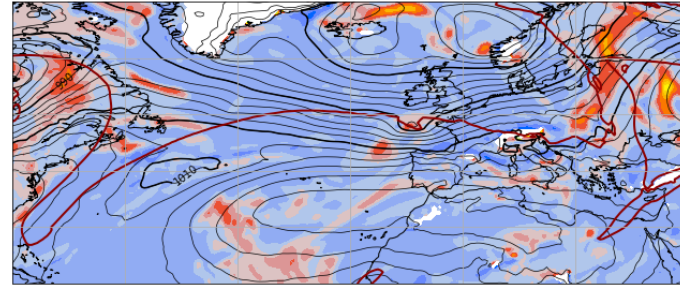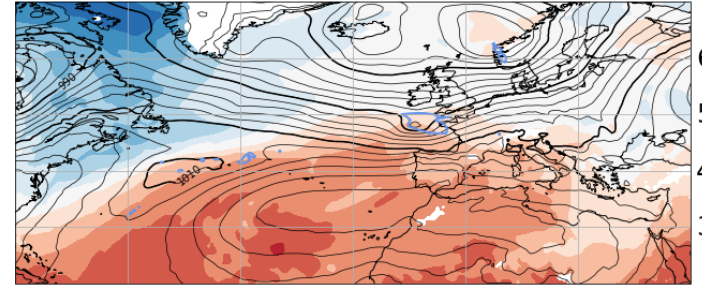

60°N  
50°N  
40°N  
30°N

06 UTC on 26 December 1999

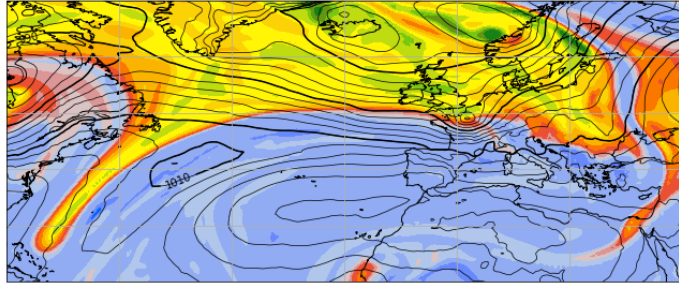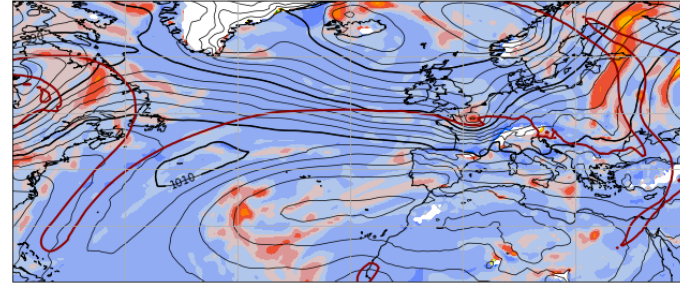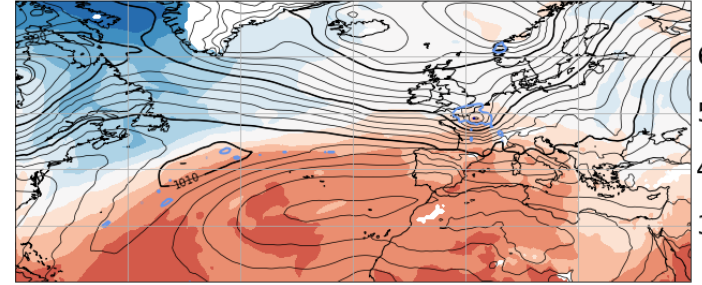

60°N  
50°N  
40°N  
30°N

12 UTC on 26 December 1999

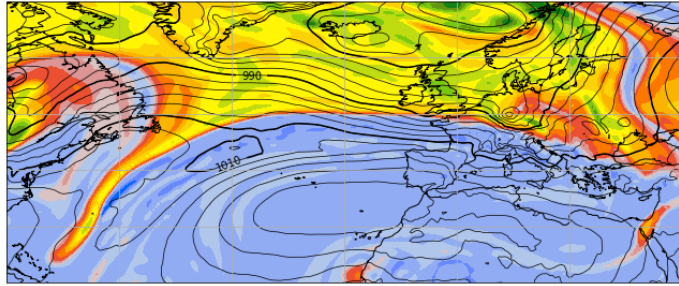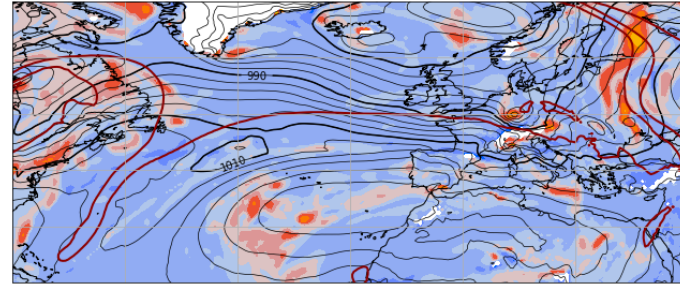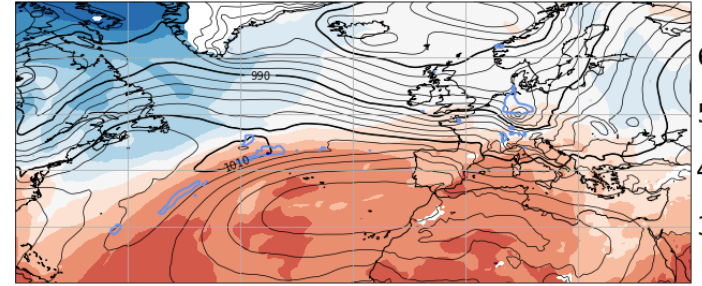

60°N  
50°N  
40°N  
30°N

18 UTC on 26 December 1999

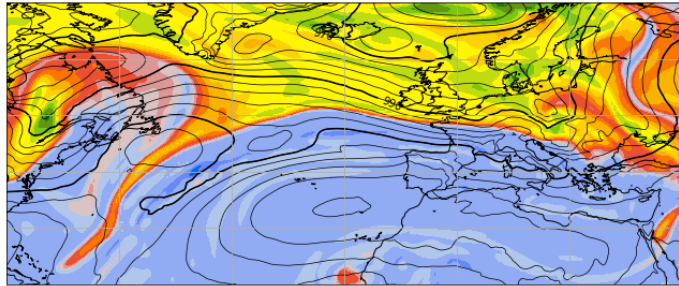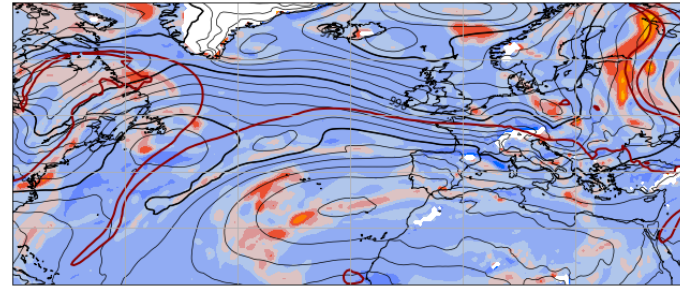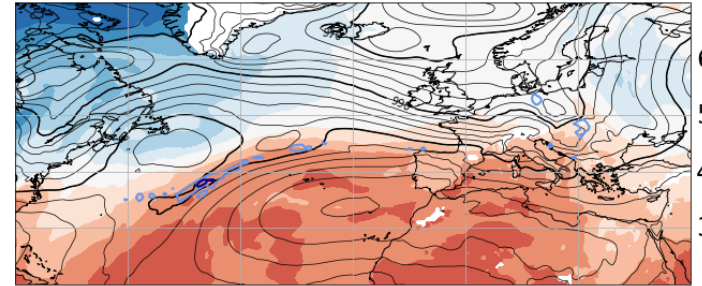

60°N  
50°N  
40°N  
30°N

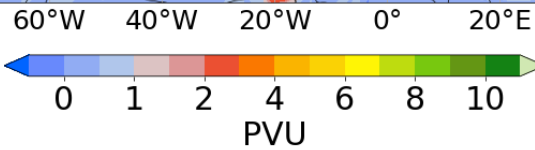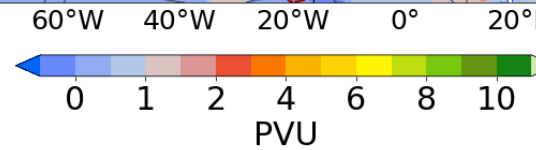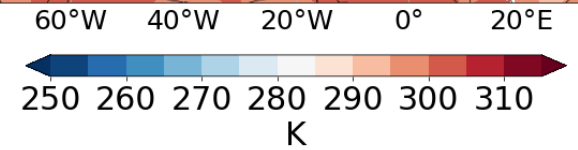

00 UTC on 27 December 1999

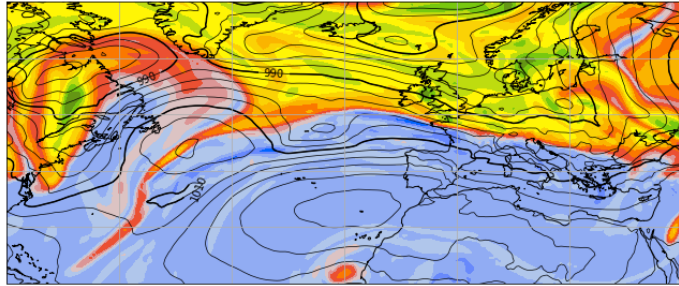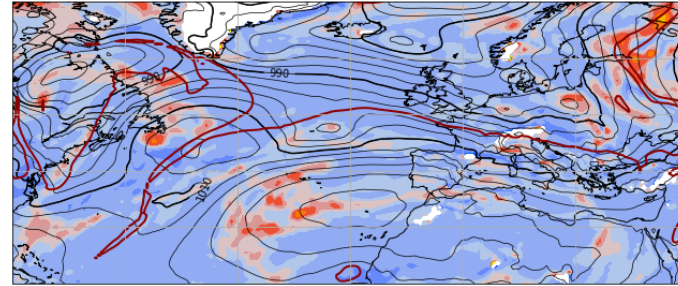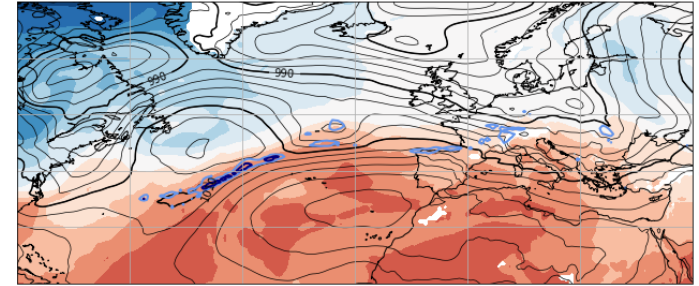

06 UTC on 27 December 1999

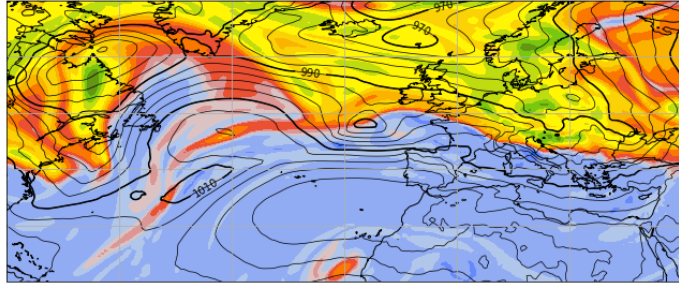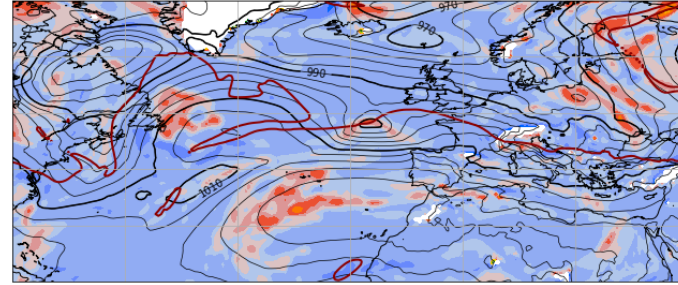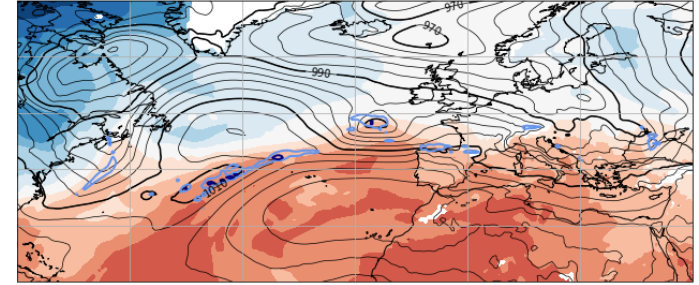

12 UTC on 27 December 1999

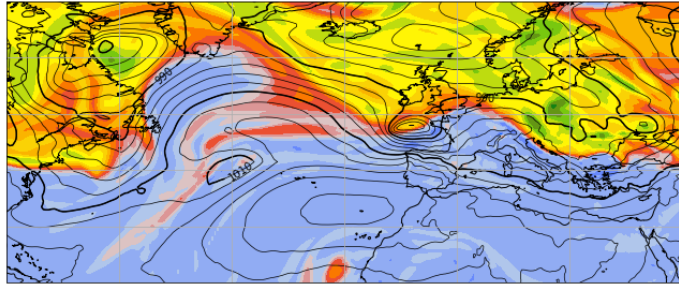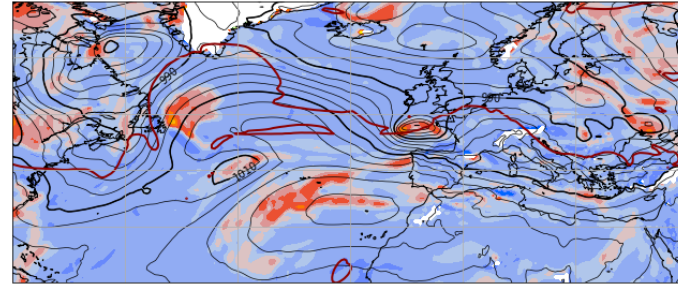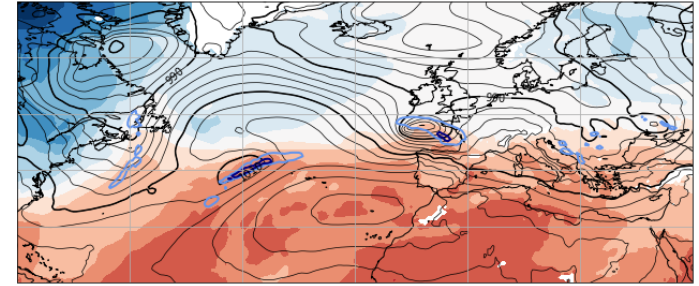

18 UTC on 27 December 1999

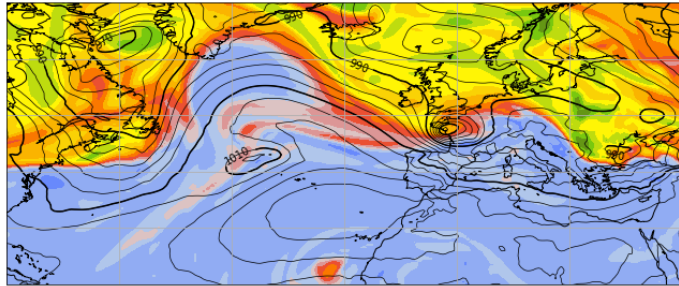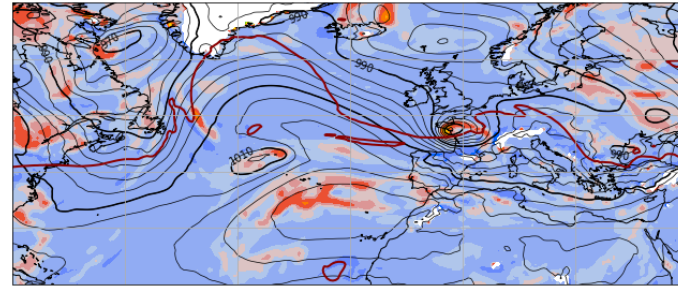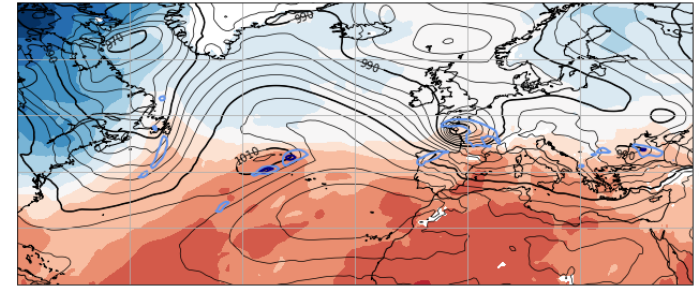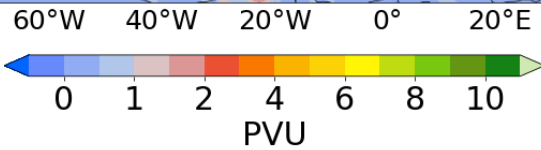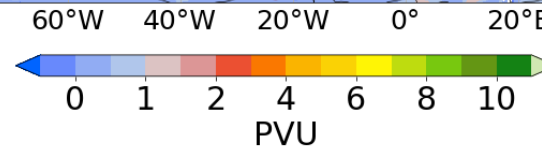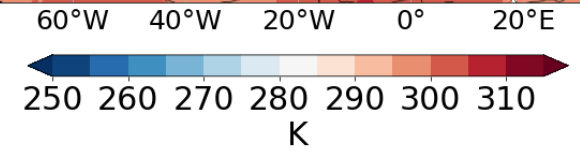

00 UTC on 28 December 1999

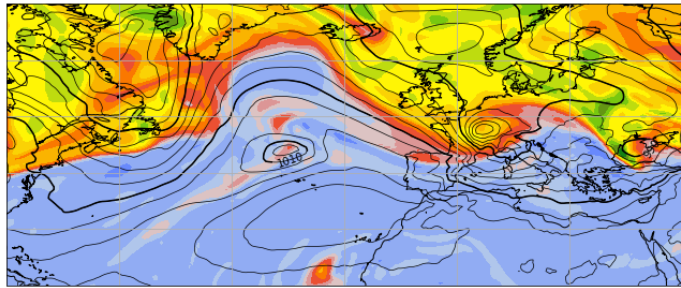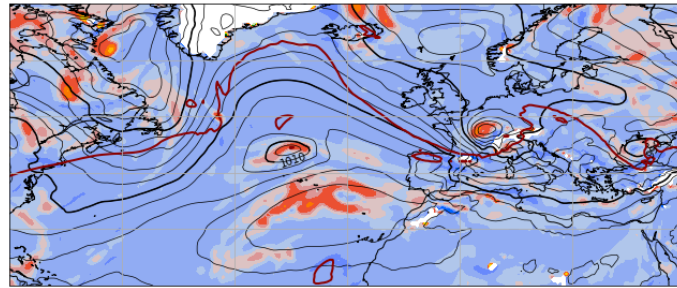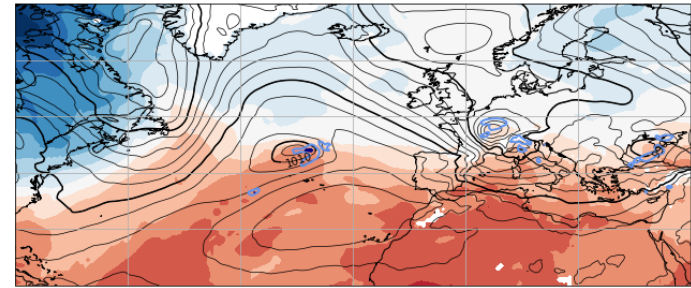

60°N  
50°N  
40°N  
30°N

06 UTC on 28 December 1999

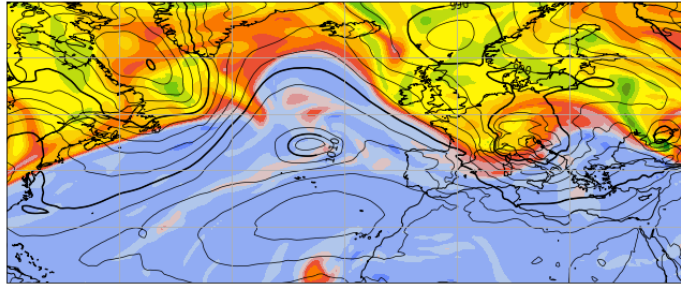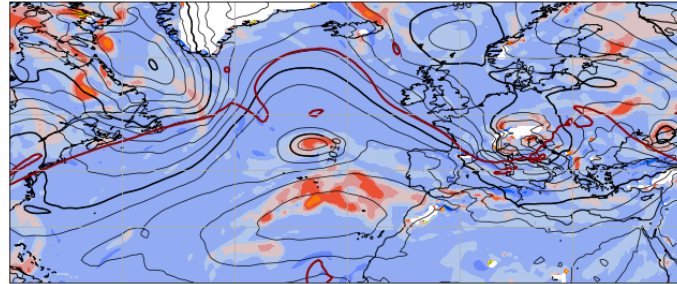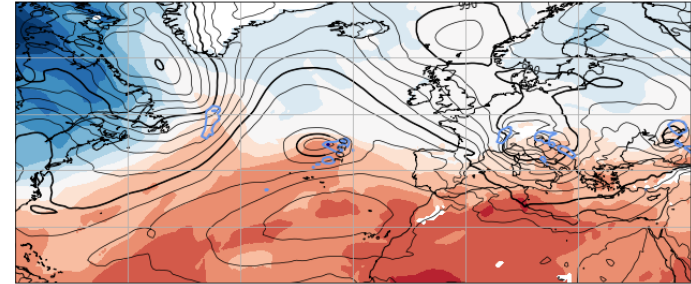

60°N  
50°N  
40°N  
30°N

12 UTC on 28 December 1999

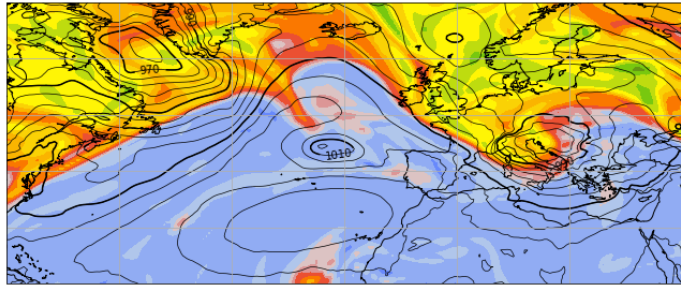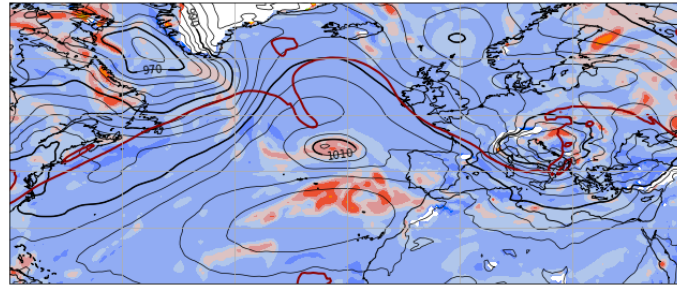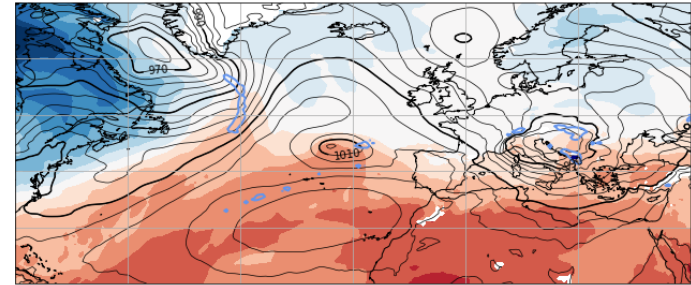

60°N  
50°N  
40°N  
30°N

18 UTC on 28 December 1999

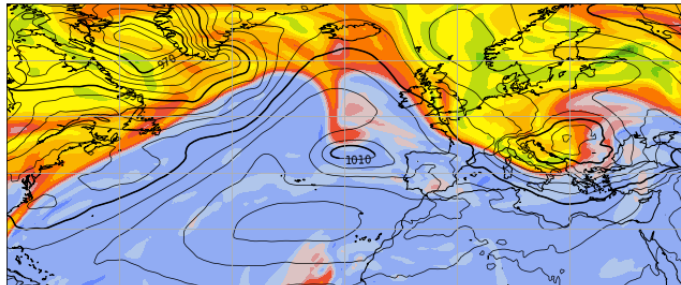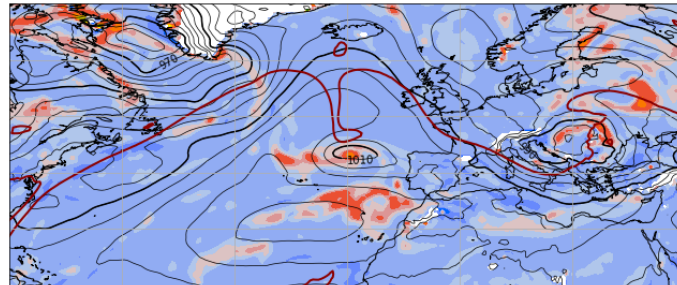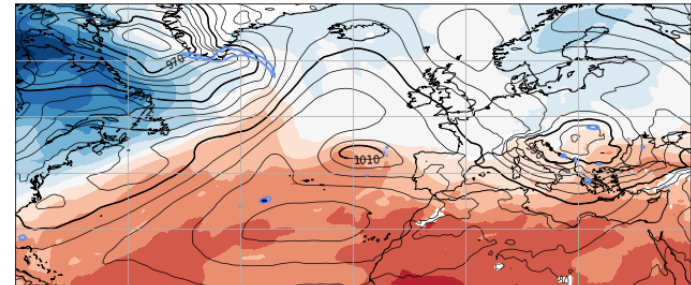

60°N  
50°N  
40°N  
30°N

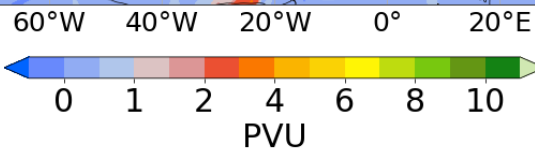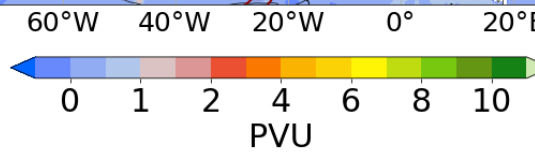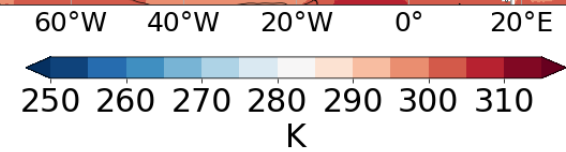

Lothar 06 UTC 25 Dec to 12 UTC 26 Dec 1999

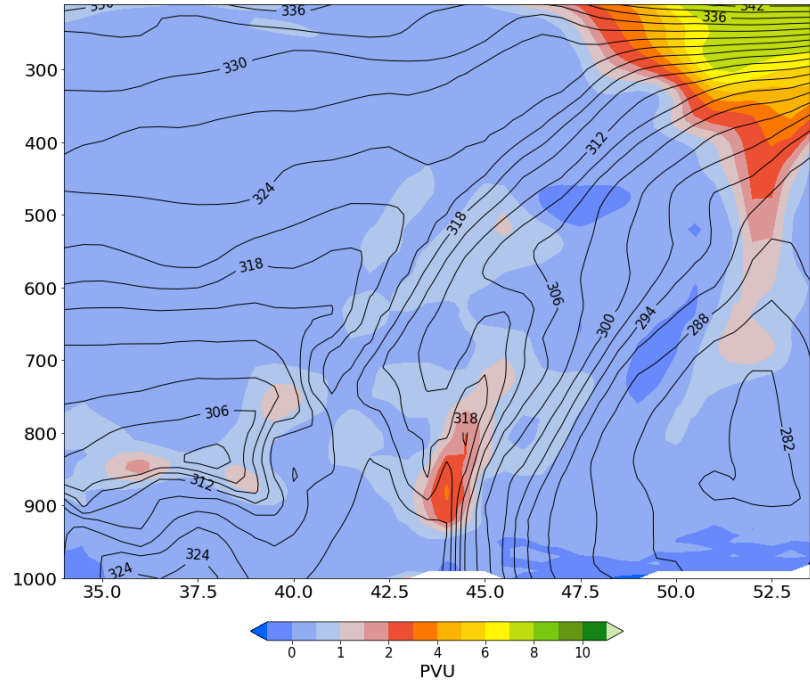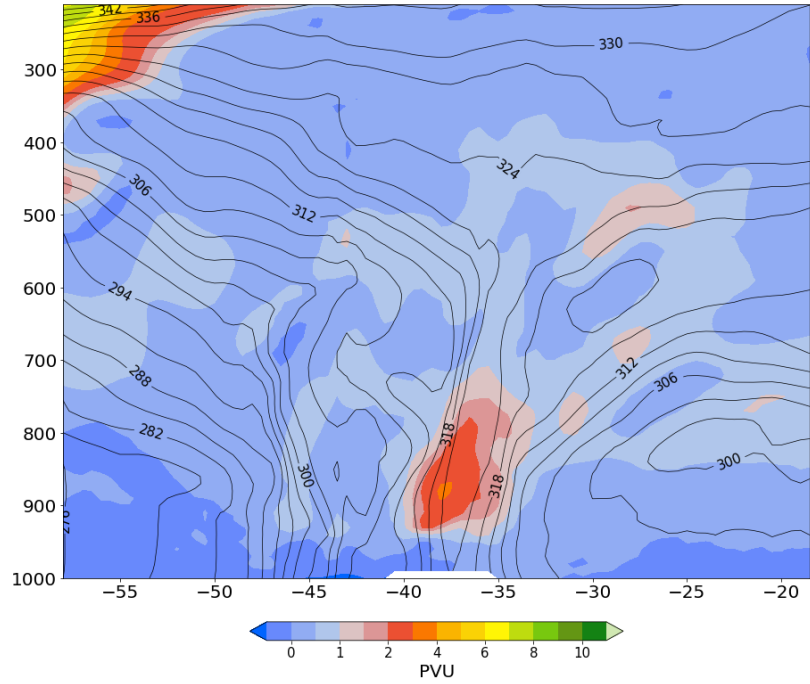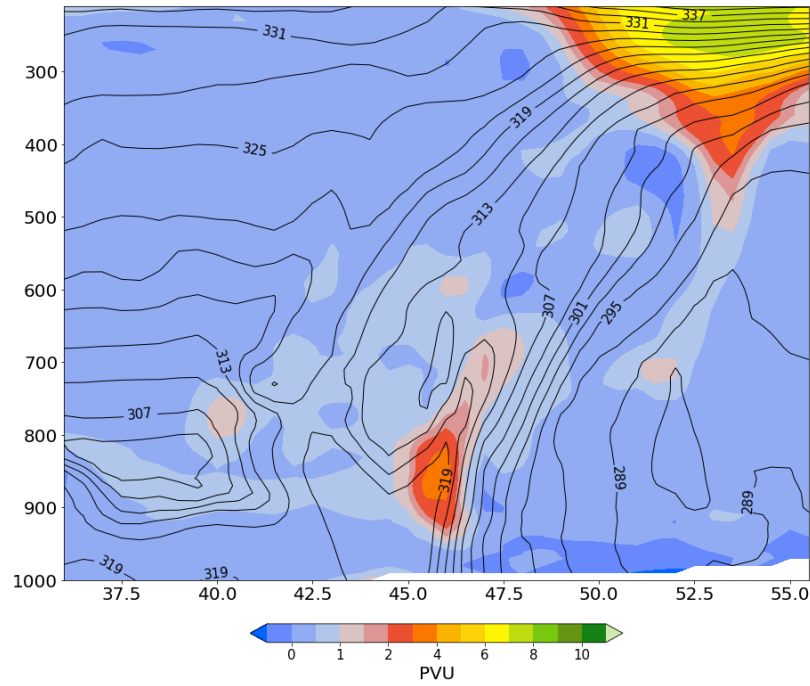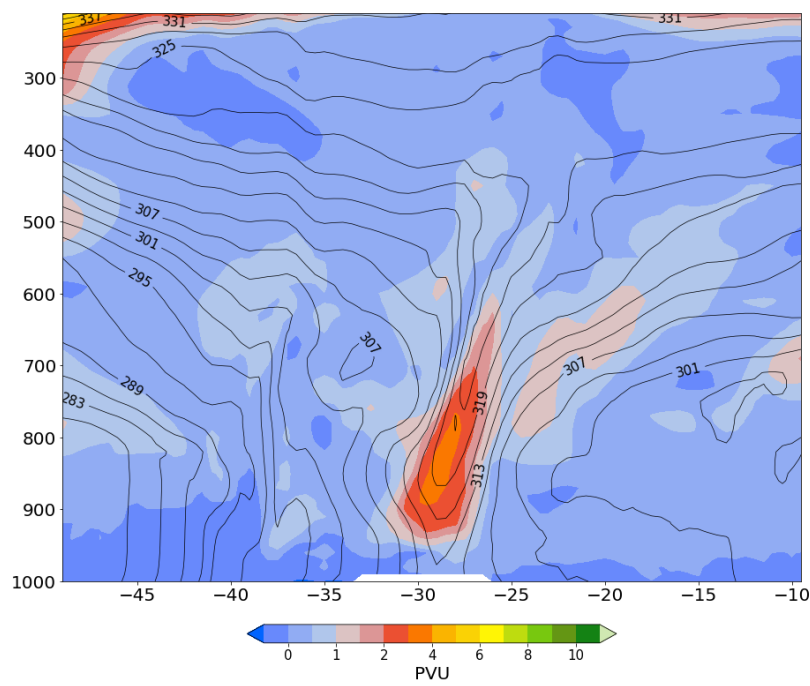

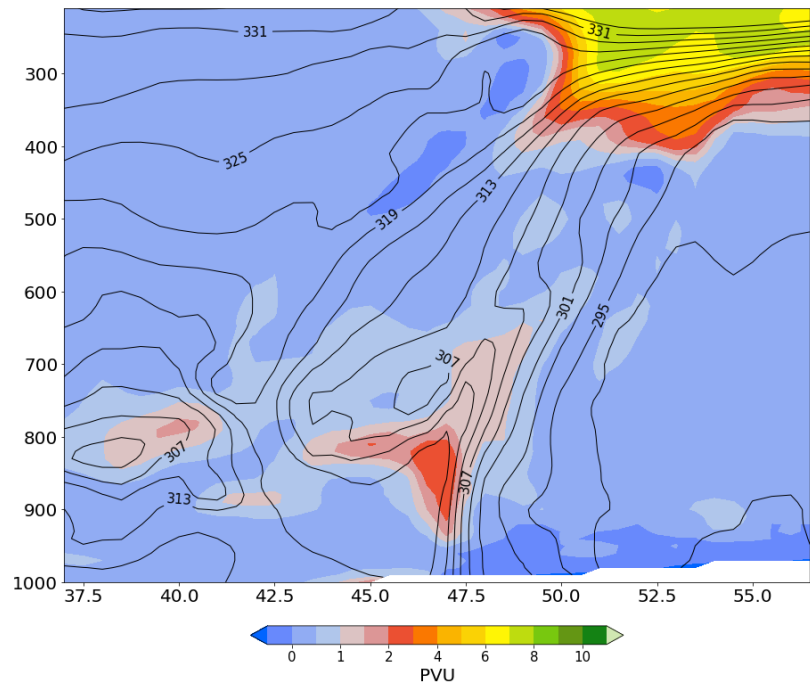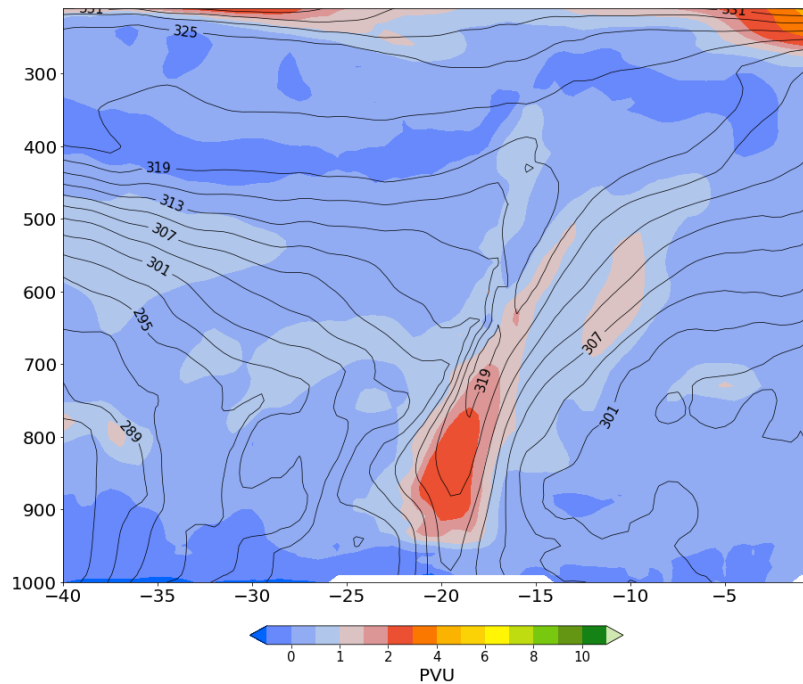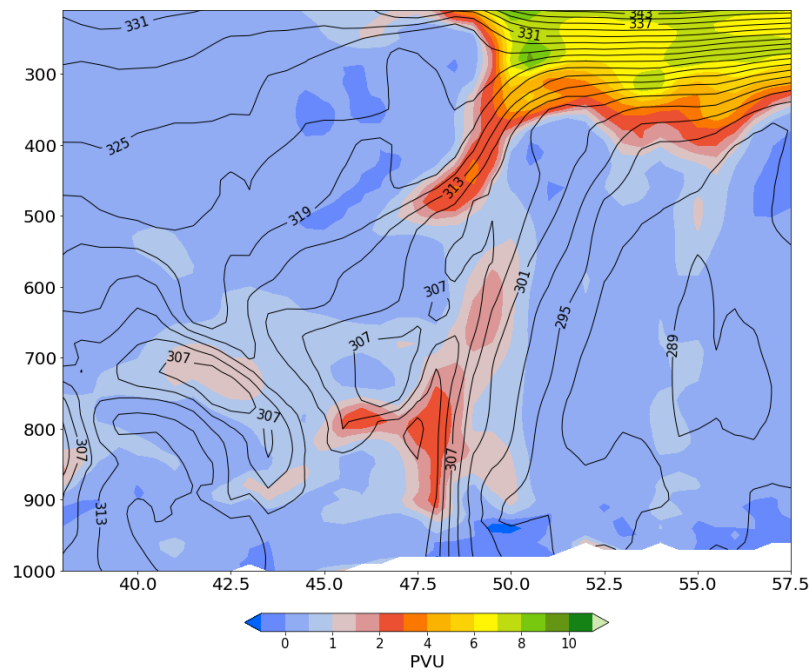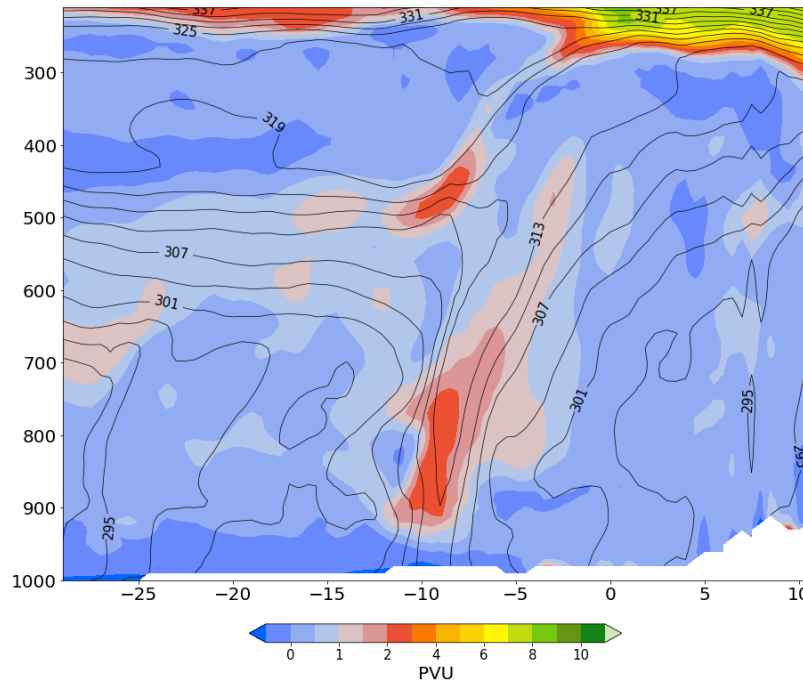

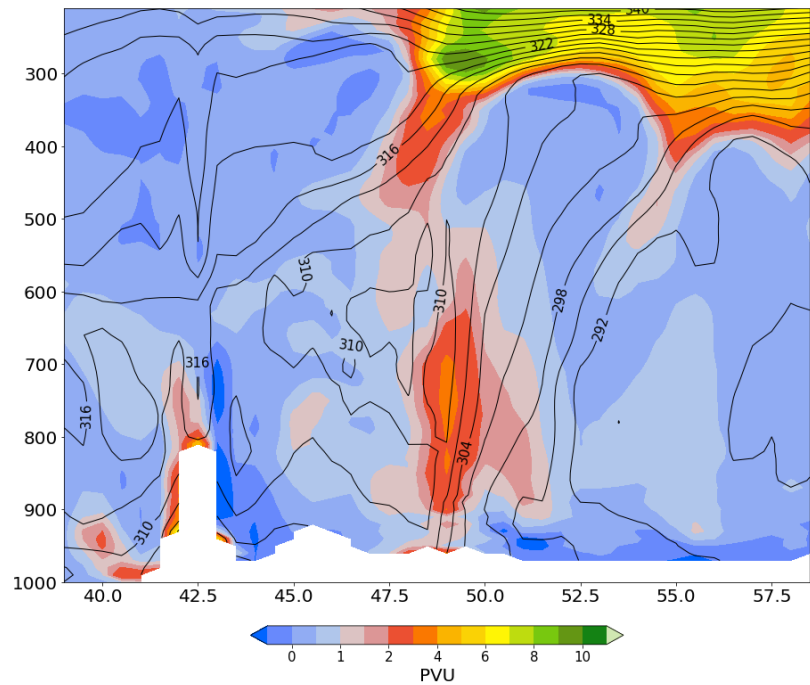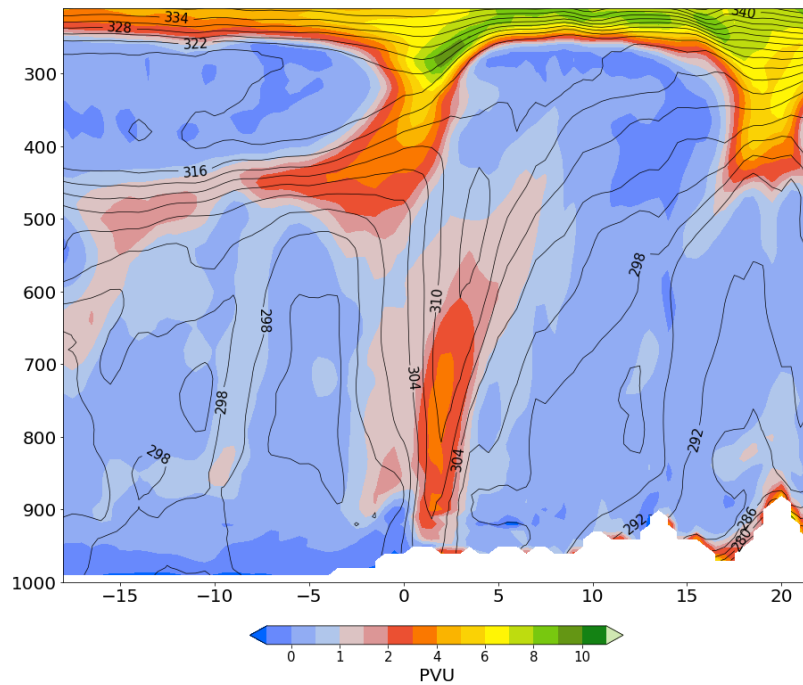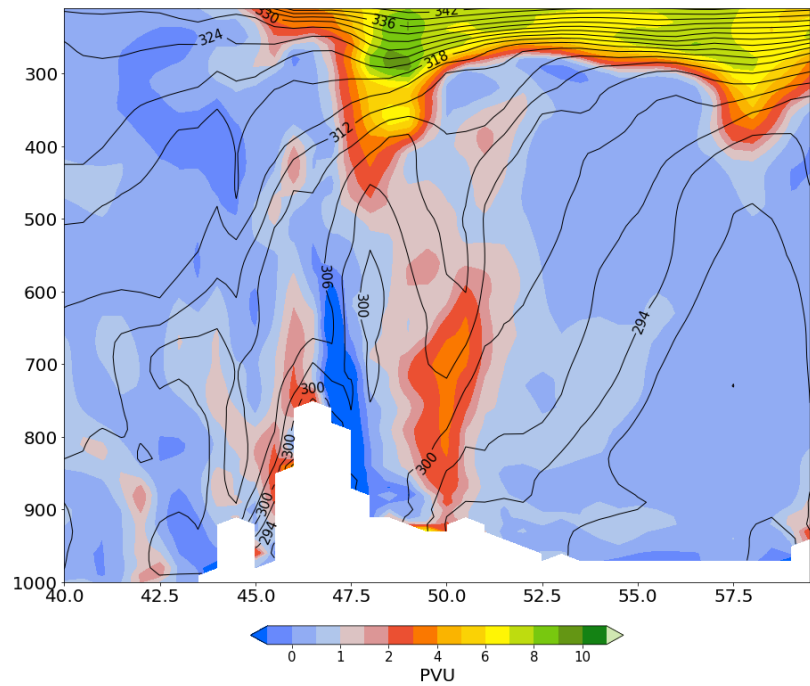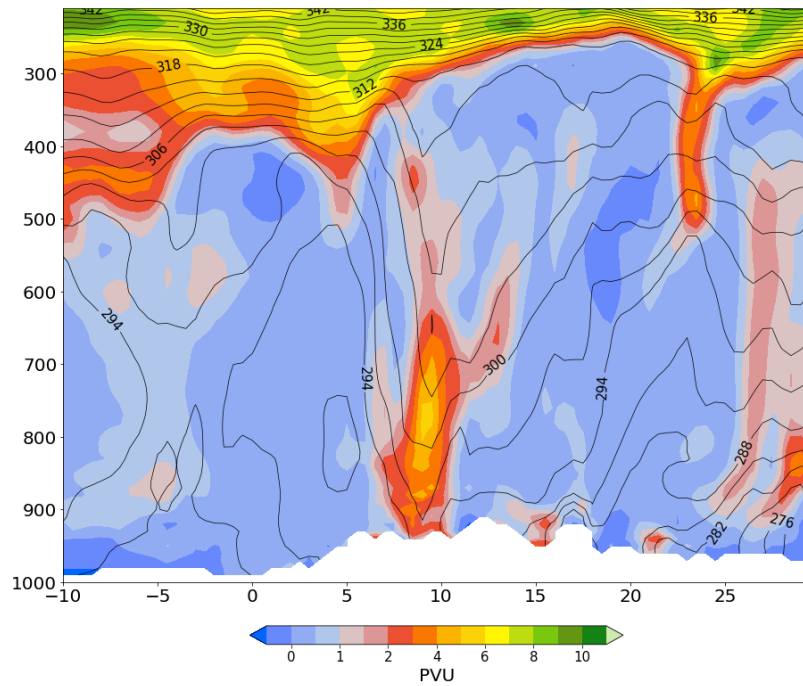

Supplement: Supplementary file 1 [file wcd-5-1299-2024-supplement.pdf]
